# Supplementary material for: The plasma peptidome
Source: Clin Proteomics. 2018 Dec 1;15:39. doi: 10.1186/s12014-018-9211-3 (PMC6271647; doi:10.1186/s12014-018-9211-3)
Supplement: Supplementary file 1 — Additional file 1. Supplemental Table I. The tryptic peptidome of human EDTA plasma. [file 12014_2018_9211_MOESM1_ESM.xlsx]

## Sheet: DistinctProteinMatrix
DistinctProteinID	Accession	TotalProteinIdentificationCount	IdentificationFilterMethod	GeneSymbol	DescriptionDatabase	DescriptionFasta	GoFunction	GoProcess	GoComponent	OriginalAccessions	X!TANDEM	SEQUEST
1	lcl|5012	120	0	DBN1	Drebrin	Drebrin DBN1	actin binding | protein binding | profilin binding |	actin filament organization | cell communication by chemical coupling | cell communication by electrical coupling | maintenance of protein location in cell | regulation of neuronal synaptic plasticity | regulation of dendrite development | neural precursor cell proliferation |	cytoplasm | plasma membrane | gap junction | cell cortex | actin cytoskeleton | dendrite | actomyosin |	F8W9Z3 530380881	4	116
2	lcl|110900	1775	0	ATP9B	PREDICTED: probable phospholipid-transporting ATPase IIB isoform X10	PREDICTED: probable phospholipid-transporting ATPase IIB isoform X10 ATP9B	magnesium ion binding | phospholipid-translocating ATPase activity | ATP binding | cation-transporting ATPase activity |	phospholipid translocation | establishment of protein localization to Golgi |	Golgi apparatus | trans-Golgi network | integral component of membrane | perinuclear region of cytoplasm |	578832465	36	1739
3	lcl|12411	206	0	CACFD1	calcium channel flower homolog isoform c	calcium channel flower homolog isoform c CACFD1	molecular_function | calcium channel activity |	biological_process | synaptic vesicle endocytosis |	cellular_component | integral component of synaptic vesicle membrane |	334724427	10	196
4	lcl|105097	4736	0	TCOF1	treacle protein isoform g	treacle protein isoform g TCOF1	transporter activity | protein binding | poly(A) RNA binding |	skeletal system development | transcription of nuclear large rRNA transcript from RNA polymerase I promoter |	nucleolus |	304376301	174	4562
5	lcl|12353	122	0	DBNL	Drebrin-like protein	Drebrin-like protein DBNL	actin binding | protein binding | protein C-terminus binding | enzyme activator activity | protein domain specific binding | actin filament binding |	immune system process | endocytosis | apoptotic process | cellular component disassembly involved in execution phase of apoptosis | activation of JUN kinase activity | synapse assembly | Rac protein signal transduction | neuron projection morphogenesis | podosome assembly |	Golgi membrane | ruffle | podosome | cytoplasm | cytosol | plasma membrane | cell cortex | postsynaptic density | lamellipodium | cell junction | dendrite | clathrin-coated vesicle membrane | extracellular vesicular exosome |	F8WCK3	0	122
6	lcl|55032	1544	0	CTAGE5	cTAGE family member 5	cTAGE family member 5 CTAGE5	enzyme activator activity |	positive regulation of catalytic activity |		G3V599	35	1509
7	lcl|5500	61	0	CTSC	Dipeptidyl peptidase 1 isoform a preproprotein (Fragment)	Dipeptidyl peptidase 1 isoform a preproprotein (Fragment) CTSC	serine-type endopeptidase activity | protein binding | cysteine-type peptidase activity | peptidase activator activity involved in apoptotic process | chloride ion binding | identical protein binding | protein self-association |	T cell mediated cytotoxicity | proteolysis | immune response | aging | response to organic substance | positive regulation of apoptotic signaling pathway |	lysosome | endoplasmic reticulum | Golgi apparatus | extracellular vesicular exosome |	I3V9V3	0	61
8	lcl|156699	146	0		PRO2272	PRO2272				Q9P174	0	146
9	lcl|13262	129	0		Folate receptor alpha isoform (Fragment)	Folate receptor alpha isoform (Fragment)				Q9NP04	0	129
10	lcl|81509	156	0	IL15RA	interleukin-15 receptor subunit alpha isoform 2 precursor	interleukin-15 receptor subunit alpha isoform 2 precursor IL15RA	signal transducer activity | cytokine receptor activity | protein binding |	signal transduction | JAK-STAT cascade | cell proliferation | negative regulation of neuron projection development | cytokine-mediated signaling pathway | response to nutrient levels | positive regulation of natural killer cell differentiation |	Golgi membrane | extracellular space | endoplasmic reticulum membrane | plasma membrane | integral component of membrane | cytoplasmic vesicle membrane | nuclear membrane |	294712549	8	148
11	lcl|128653	174	0	ART3	Ecto-ADP-ribosyltransferase 3 (Fragment)	Ecto-ADP-ribosyltransferase 3 (Fragment) ART3	NAD+ ADP-ribosyltransferase activity | NAD(P)+-protein-arginine ADP-ribosyltransferase activity |	protein ADP-ribosylation |	integral component of plasma membrane | anchored component of membrane |	E7ESB3	0	174
12	lcl|66069	382	0	RBM19	Probable RNA-binding protein 19 (Fragment)	Probable RNA-binding protein 19 (Fragment) RBM19	nucleotide binding | poly(A) RNA binding |	multicellular organismal development | positive regulation of embryonic development |	nucleoplasm | chromosome | nucleolus | nucleolus | cytoplasm |	H0YIL2	0	382
13	lcl|7022	244	0	TRA@	TRA@ protein	TRA@ protein TRA@				Q6IRV4	0	244
14	lcl|131997	516	0	MPST	Sulfurtransferase	Sulfurtransferase MPST	thiosulfate sulfurtransferase activity | 3-mercaptopyruvate sulfurtransferase activity |	cyanate catabolic process | response to toxic substance | hydrogen sulfide biosynthetic process |	mitochondrion | cell junction | neuron projection | synapse | extracellular vesicular exosome |	B1AH49	4	512
15	lcl|144635	386	0		cDNA FLJ52001, highly similar to SPARC-related modular calcium-binding protein 2	cDNA FLJ52001, highly similar to SPARC-related modular calcium-binding protein 2				B4DNB1	48	338
16	lcl|7092	53	0		Putative microtubule-binding protein (Fragment)	Putative microtubule-binding protein (Fragment)				Q9UJ35	0	53
17	lcl|5272	283	0		cDNA FLJ27209 fis, clone SYN03476	cDNA FLJ27209 fis, clone SYN03476				Q6ZNT2	0	283
18	lcl|25755	894	0		cDNA FLJ10642 fis, clone NT2RP2005752, highly similar to Tumor necrosis factor receptor superfamily member 21	cDNA FLJ10642 fis, clone NT2RP2005752, highly similar to Tumor necrosis factor receptor superfamily member 21				B3KMB6	16	878
19	lcl|3727	127	0	ND5	NADH-ubiquinone oxidoreductase chain 5	NADH-ubiquinone oxidoreductase chain 5 ND5				C8Y4J8	12	115
20	lcl|69014	2323	0	KIAA0430	PREDICTED: meiosis arrest female protein 1 isoform X4	PREDICTED: meiosis arrest female protein 1 isoform X4 KIAA0430	nucleotide binding | molecular_function | RNA binding |	double-strand break repair | female meiosis | regulation of gene expression | negative regulation of phosphatase activity | cell differentiation | oogenesis |	peroxisome |	530409429 578840059	30	2293
21	lcl|89806	448	0	NKX1-1	NK1 transcription factor-related protein 1	NK1 transcription factor-related protein 1 NKX1-1	sequence-specific DNA binding transcription factor activity | sequence-specific DNA binding |	lipid metabolic process | biological_process | regulation of glucose metabolic process | regulation of generation of precursor metabolites and energy | neurological system process |	nucleus |	587651890	82	366
22	lcl|3687	861	0	ZNF768	Zinc finger protein 768	Zinc finger protein 768 ZNF768	DNA binding | poly(A) RNA binding | metal ion binding |	regulation of transcription, DNA-templated | transcription from RNA polymerase II promoter |	DNA-directed RNA polymerase II, core complex |	H3BS42	12	849
23	lcl|128484	449	0	FZR1	PREDICTED: fizzy-related protein homolog isoform X2	PREDICTED: fizzy-related protein homolog isoform X2 FZR1	protein binding |	mitotic cell cycle | DNA repair | mitosis | positive regulation of cell proliferation | anaphase-promoting complex-dependent proteasomal ubiquitin-dependent protein catabolic process | anaphase-promoting complex-dependent proteasomal ubiquitin-dependent protein catabolic process | G2 DNA damage checkpoint | regulation of meiosis | positive regulation of protein catabolic process | negative regula…	nucleoplasm | anaphase-promoting complex | cytosol |	578833304	0	449
24	lcl|60421	503	0	ZNF559-ZNF177	zinc finger protein 177 isoform b	zinc finger protein 177 isoform b ZNF559-ZNF177	DNA binding | metal ion binding |	negative regulation of transcription from RNA polymerase II promoter | transcription, DNA-templated |	nucleus | blood microparticle |	289547609 289547607	0	503
25	lcl|67197	470	0	ACSF3	Acyl-CoA synthetase family member 3, mitochondrial (Fragment)	Acyl-CoA synthetase family member 3, mitochondrial (Fragment) ACSF3	ATP binding | acid-thiol ligase activity | malonyl-CoA synthetase activity |	fatty acid metabolic process | fatty acid biosynthetic process | malonate catabolic process |	mitochondrion |	F5H755	22	448
26	lcl|68095	765	0		cDNA, FLJ96701	cDNA, FLJ96701				B2RDP1	10	755
27	lcl|11035	265	0	HLA-A	MHC class I antigen (Fragment)	MHC class I antigen (Fragment) HLA-A	receptor binding | receptor binding | protein binding | peptide antigen binding | peptide antigen binding | peptide antigen binding | poly(A) RNA binding | TAP binding |	positive regulation of T cell mediated cytotoxicity | positive regulation of T cell mediated cytotoxicity | antigen processing and presentation of peptide antigen via MHC class I | antigen processing and presentation of exogenous peptide antigen via MHC class I, TAP-dependent | antigen processing and presentation of exogenous peptide antigen via MHC class I, TAP-independent | antigen processing a…	Golgi membrane | plasma membrane | integral component of plasma membrane | cell surface | ER to Golgi transport vesicle membrane | phagocytic vesicle membrane | early endosome membrane | MHC class I protein complex | MHC class I protein complex | extracellular vesicular exosome | integral component of lumenal side of endoplasmic reticulum membrane |	F8R114 H2BE90	0	265
28	lcl|8344	7242	0	MYCBP2	Probable E3 ubiquitin-protein ligase MYCBP2	Probable E3 ubiquitin-protein ligase MYCBP2 MYCBP2	ubiquitin-protein ligase activity | protein binding | zinc ion binding | protein homodimerization activity |	transcription, DNA-templated | regulation of transcription, DNA-templated | branchiomotor neuron axon guidance | central nervous system projection neuron axonogenesis | regulation of protein localization | regulation of cytoskeleton organization |	nucleus | microtubule cytoskeleton | axon |	O75592	120	7122
29	lcl|36135	141	0	SALL1	SALL1 protein	SALL1 protein SALL1	DNA binding | chromatin binding | sequence-specific DNA binding transcription factor activity | histone deacetylase activity | protein binding | beta-catenin binding | metal ion binding |	negative regulation of transcription from RNA polymerase II promoter | ureteric bud development | branching involved in ureteric bud morphogenesis | kidney development | neural tube closure | ventricular septum development | mesenchymal to epithelial transition involved in metanephros morphogenesis | transcription, DNA-templated | heart development | gonad development | histone deacetylation | ol…	heterochromatin | nucleus | cytoplasm | chromocenter | NuRD complex |	Q14CE9	4	137
30	lcl|150871	394	0		cDNA FLJ56667, highly similar to Phenylalanine-4-hydroxylase (EC 1.14.16.1)	cDNA FLJ56667, highly similar to Phenylalanine-4-hydroxylase (EC 1.14.16.1)				B4DPN2	12	382
31	lcl|37564	1350	0	C11orf30	PREDICTED: protein EMSY isoform X9	PREDICTED: protein EMSY isoform X9 C11orf30		DNA repair | transcription, DNA-templated | regulation of transcription, DNA-templated | chromatin modification |	nucleus |	578821616	51	1299
32	lcl|71288	259	0	FAM153A	PREDICTED: protein FAM153A isoform X4	PREDICTED: protein FAM153A isoform X4 FAM153A				578811069 578811071 578811073 578811075 578811077	0	259
33	lcl|39632	215	0	SAYSD1	SAYSvFN domain-containing protein 1	SAYSvFN domain-containing protein 1 SAYSD1			integral component of membrane | cytoplasmic vesicle membrane |	Q9NPB0 8922867	10	205
34	lcl|3452	293	0	HLA-A	MHC class I antigen (Fragment)	MHC class I antigen (Fragment) HLA-A	receptor binding | receptor binding | protein binding | peptide antigen binding | peptide antigen binding | peptide antigen binding | poly(A) RNA binding | TAP binding |	positive regulation of T cell mediated cytotoxicity | positive regulation of T cell mediated cytotoxicity | antigen processing and presentation of peptide antigen via MHC class I | antigen processing and presentation of exogenous peptide antigen via MHC class I, TAP-dependent | antigen processing and presentation of exogenous peptide antigen via MHC class I, TAP-independent | antigen processing a…	Golgi membrane | plasma membrane | integral component of plasma membrane | cell surface | ER to Golgi transport vesicle membrane | phagocytic vesicle membrane | early endosome membrane | MHC class I protein complex | MHC class I protein complex | extracellular vesicular exosome | integral component of lumenal side of endoplasmic reticulum membrane |	L7X986 Q4A1H0	0	293
35	lcl|10001	936	0	RAP1GAP	rap1 GTPase-activating protein 1 isoform a	rap1 GTPase-activating protein 1 isoform a RAP1GAP	GTPase activity | GTPase activator activity | protein binding | Ras GTPase binding | protein homodimerization activity | Rap GTPase activator activity |	GTP catabolic process | signal transduction | regulation of Ras GTPase activity | positive regulation of Rap GTPase activity |	Golgi membrane | cytosol | cytosol | membrane |	224809578	26	910
36	lcl|125367	414	0		cDNA FLJ12859 fis, clone NT2RP2003522, highly similar to Zinc finger protein 281	cDNA FLJ12859 fis, clone NT2RP2003522, highly similar to Zinc finger protein 281				B3KMX4	0	414
37	lcl|144581	563	0	PRAMEF25	PREDICTED: putative PRAME family member 25	PREDICTED: putative PRAME family member 25 PRAMEF25	retinoic acid receptor binding |	positive regulation of cell proliferation | negative regulation of apoptotic process | negative regulation of cell differentiation | negative regulation of transcription, DNA-templated | negative regulation of retinoic acid receptor signaling pathway |		578839316	6	557
38	lcl|1836	499	0	DRC1	PREDICTED: dynein regulatory complex protein 1 isoform X2	PREDICTED: dynein regulatory complex protein 1 isoform X2 DRC1		cilium-dependent cell motility | axonemal dynein complex assembly | bacterial-type flagellum-dependent cell motility |	cytoskeleton | axoneme |	530368272	12	487
39	lcl|142595	86	0		Gamma-globin (Fragment)	Gamma-globin (Fragment)				Q9UJ01	4	82
40	lcl|37519	216	0	PDCD10	Programmed cell death protein 10 (Fragment)	Programmed cell death protein 10 (Fragment) PDCD10	protein binding | protein homodimerization activity | protein N-terminus binding |	angiogenesis | apoptotic process | positive regulation of cell proliferation | negative regulation of apoptotic process | positive regulation of MAP kinase activity |	Golgi membrane | cytosol | plasma membrane | extracellular vesicular exosome |	C9J932	4	212
41	lcl|69673	4	0	PTSG1	Cyclooxygenase-1 (Fragment)	Cyclooxygenase-1 (Fragment) PTSG1				Q6LCE7	0	4
42	lcl|71388	569	0	RFTN1	RFTN1 protein (Fragment)	RFTN1 protein (Fragment) RFTN1	double-stranded RNA binding |	dsRNA transport | toll-like receptor 3 signaling pathway | response to exogenous dsRNA |	cytoplasm | endosome | plasma membrane | protein complex | membrane raft | extracellular vesicular exosome |	Q8N5I0	4	565
43	lcl|45475	20	0	ND6	NADH-ubiquinone oxidoreductase chain 6	NADH-ubiquinone oxidoreductase chain 6 ND6				E5KYD5	0	20
44	lcl|30434	941	0	DKFZp566E044	Putative uncharacterized protein DKFZp566E044	Putative uncharacterized protein DKFZp566E044 DKFZp566E044				Q9NSW6	4	937
45	lcl|83803	1490	0	DFNB31	DFNB31 protein	DFNB31 protein DFNB31	protein binding |	retina homeostasis | sensory perception of sound | sensory perception of light stimulus | inner ear receptor stereocilium organization |	stereocilia ankle link complex | cytoplasm | actin filament | cilium | growth cone | stereocilium |	B9EGE6 290746380	30	1460
46	lcl|61684	498	0		cDNA FLJ57362, highly similar to Homo sapiens BTB (POZ) domain containing 1 (BTBD1), transcript variant 2, mRNA	cDNA FLJ57362, highly similar to Homo sapiens BTB (POZ) domain containing 1 (BTBD1), transcript variant 2, mRNA				B7Z271	0	498
47	lcl|72102	311	0	GDNFR3	GDNF family receptor alpha-3 variant	GDNF family receptor alpha-3 variant GDNFR3				K9J968	12	299
48	lcl|96974	126	0	LCMT2	cDNA FLJ51321, highly similar to Leucine carboxyl methyltransferase 2 (EC 2.1.1.-)	cDNA FLJ51321, highly similar to Leucine carboxyl methyltransferase 2 (EC 2.1.1.-) LCMT2	protein binding | methyltransferase activity |	tRNA processing |		B4DUW3	0	126
49	lcl|55249	300	0	FAM122C	PREDICTED: protein FAM122C isoform X3	PREDICTED: protein FAM122C isoform X3 FAM122C				530422366	4	296
50	lcl|15484	209	0	PDCD6IP	Programmed cell death 6-interacting protein (Fragment)	Programmed cell death 6-interacting protein (Fragment) PDCD6IP	protein binding | SH3 domain binding | protein dimerization activity | calcium-dependent protein binding |	apoptotic process | cell cycle | protein transport | viral process | viral life cycle | cell division |	immunological synapse | microtubule organizing center | cytosol | melanosome | extracellular vesicular exosome |	C9IZF9	0	209
51	lcl|108546	115	0	HLA-A	MHC class I antigen (Fragment)	MHC class I antigen (Fragment) HLA-A	receptor binding | receptor binding | protein binding | peptide antigen binding | peptide antigen binding | peptide antigen binding | poly(A) RNA binding | TAP binding |	positive regulation of T cell mediated cytotoxicity | positive regulation of T cell mediated cytotoxicity | antigen processing and presentation of peptide antigen via MHC class I | antigen processing and presentation of exogenous peptide antigen via MHC class I, TAP-dependent | antigen processing and presentation of exogenous peptide antigen via MHC class I, TAP-independent | antigen processing a…	Golgi membrane | plasma membrane | integral component of plasma membrane | cell surface | ER to Golgi transport vesicle membrane | phagocytic vesicle membrane | early endosome membrane | MHC class I protein complex | MHC class I protein complex | extracellular vesicular exosome | integral component of lumenal side of endoplasmic reticulum membrane |	C0M143 G0KXH1	0	115
52	lcl|56363	58	0	DPY19L4	Probable C-mannosyltransferase DPY19L4 (Fragment)	Probable C-mannosyltransferase DPY19L4 (Fragment) DPY19L4	transferase activity, transferring glycosyl groups |		integral component of membrane |	H0YBK6	4	54
53	lcl|104043	4516	0	MAP4	PREDICTED: microtubule-associated protein 4 isoform X32	PREDICTED: microtubule-associated protein 4 isoform X32 MAP4	structural molecule activity | protein binding | microtubule binding | poly(A) RNA binding |	mitotic spindle organization | microtubule sliding | establishment of spindle orientation | establishment of spindle orientation | cell division |	microtubule | microtubule associated complex | mitotic spindle |	578806075	82	4434
54	lcl|89320	1025	0	CD109	CD109 antigen isoform 2 precursor	CD109 antigen isoform 2 precursor CD109	serine-type endopeptidase inhibitor activity | transforming growth factor beta binding |	negative regulation of transforming growth factor beta receptor signaling pathway | negative regulation of wound healing |	extracellular space | plasma membrane | anchored component of membrane |	227430301	10	1015
55	lcl|104285	996	0	FASTKD2	FAST kinase domain-containing protein 2	FAST kinase domain-containing protein 2 FASTKD2	protein kinase activity | poly(A) RNA binding |	cellular respiration |	mitochondrion |	Q9NYY8 45267832 209969830 209969832	6	990
56	lcl|83914	382	0	VEGFA	vascular endothelial growth factor A isoform j precursor	vascular endothelial growth factor A isoform j precursor VEGFA	fibronectin binding | cytokine activity | cytokine activity | platelet-derived growth factor receptor binding | vascular endothelial growth factor receptor binding | protein binding | growth factor activity | growth factor activity | heparin binding | heparin binding | chemoattractant activity | identical protein binding | protein homodimerization activity | vascular endothelial growth factor rec…	negative regulation of transcription from RNA polymerase II promoter | angiogenesis | ovarian follicle development | patterning of blood vessels | vasculogenesis | response to hypoxia | in utero embryonic development | kidney development | positive regulation of protein phosphorylation | positive regulation of endothelial cell proliferation | positive regulation of endothelial cell proliferation …	extracellular region | proteinaceous extracellular matrix | extracellular space | extracellular space | cytoplasm | cell surface | membrane | secretory granule | platelet alpha granule lumen |	284172461	0	382
57	lcl|101413	35	0	MYO10	MYO10 protein	MYO10 protein MYO10	protein binding | calmodulin binding | ATP binding | phosphatidylinositol-3,4,5-trisphosphate binding | spectrin binding | actin-dependent ATPase activity | actin filament binding | plus-end directed microfilament motor activity |	ATP catabolic process | axon guidance | metabolic process | regulation of cell shape | positive regulation of cell-cell adhesion | cytoskeleton-dependent intracellular transport | Fc-gamma receptor signaling pathway involved in phagocytosis | innate immune response | regulation of filopodium assembly |	ruffle | cytosol | cell cortex | myosin complex | lamellipodium | filopodium membrane | filopodium tip | neuron projection | neuronal cell body |	Q8IVX5	0	35
58	lcl|149994	280	0	GPR89B	PREDICTED: Golgi pH regulator B isoform X5	PREDICTED: Golgi pH regulator B isoform X5 GPR89B	voltage-gated ion channel activity |	protein transport |	Golgi membrane | integral component of membrane |	578801083 530432100 303304977	4	276
59	lcl|146392	71	0		CDNA: FLJ23555 fis, clone LNG09438	CDNA: FLJ23555 fis, clone LNG09438				Q9H5D5	0	71
60	lcl|46066	680	0	ZNF215	Zinc finger protein 215	Zinc finger protein 215 ZNF215	sequence-specific DNA binding RNA polymerase II transcription factor activity | DNA binding | sequence-specific DNA binding transcription factor activity | metal ion binding |	regulation of transcription from RNA polymerase II promoter | transcription from RNA polymerase II promoter |	nucleus |	Q9UL58 578820768 93004074	4	676
61	lcl|114009	165	0	PDCD6	programmed cell death protein 6 isoform 4	programmed cell death protein 6 isoform 4 PDCD6	calcium-dependent cysteine-type endopeptidase activity | calcium ion binding | protein binding | protein homodimerization activity | protein dimerization activity | calcium-dependent protein binding | binding, bridging |	angiogenesis | positive regulation of endothelial cell proliferation | proteolysis | intracellular protein transport | activation of cysteine-type endopeptidase activity involved in apoptotic process | positive regulation of endothelial cell migration | negative regulation of vascular endothelial growth factor receptor signaling pathway | negative regulation of TOR signaling | cellular response t…	nucleus | cytoplasm | endosome | endoplasmic reticulum | endoplasmic reticulum membrane | cytoplasmic vesicle | nuclear membrane | extracellular vesicular exosome |	389565487	4	161
62	lcl|84601	66	0	CSN1S1	Alpha-S1-casein (Fragment)	Alpha-S1-casein (Fragment) CSN1S1	transporter activity |		extracellular region |	H0Y8K1	4	62
63	lcl|53604	507	0		cDNA FLJ16416 fis, clone BRACE3001066, highly similar to Homo sapiens BTB (POZ) domain containing 11 (BTBD11), transcript variant 3, mRNA	cDNA FLJ16416 fis, clone BRACE3001066, highly similar to Homo sapiens BTB (POZ) domain containing 11 (BTBD11), transcript variant 3, mRNA				B3KVD0	12	495
64	lcl|49402	365	0	MROH9	Maestro heat-like repeat-containing protein family member 9	Maestro heat-like repeat-containing protein family member 9 MROH9				Q5TGP6 117956387	4	361
65	lcl|49222	100	0	SLC25A22	Mitochondrial glutamate carrier 1 (Fragment)	Mitochondrial glutamate carrier 1 (Fragment) SLC25A22	L-glutamate transmembrane transporter activity | symporter activity |	L-glutamate transport |	mitochondrial inner membrane | integral component of membrane |	K4DIB4	4	96
66	lcl|108005	313	0	TOLLIP	Toll-interacting protein	Toll-interacting protein TOLLIP	signal transducer activity | interleukin-1, Type I receptor binding | protein binding | kinase binding | ubiquitin conjugating enzyme binding | ubiquitin protein ligase binding | SUMO binding | Toll-like receptor binding |	inflammatory response | signal transduction | cell-cell signaling | phosphorylation | epithelial cell differentiation | positive regulation of protein sumoylation | intracellular signal transduction | protein localization to endosome | innate immune response | leukocyte activation |	cytoplasm | cytosol | nuclear body | interleukin-18 receptor complex | interleukin-1 receptor complex | perinuclear region of cytoplasm | extracellular vesicular exosome |	Q9H0E2 Q6FIE9 21361619	0	313
67	lcl|154146	327	0		HT018	HT018				Q9HBL2	0	327
68	lcl|18761	217	0	ODF4	Outer dense fiber protein 4	Outer dense fiber protein 4 ODF4		multicellular organismal development | spermatogenesis | cell differentiation |	outer dense fiber | integral component of membrane | motile cilium |	Q2M2E3 171184433	4	213
69	lcl|131313	837	0		cDNA FLJ12857 fis, clone NT2RP2003513, highly similar to Homo sapiens paralemmin (PALM), transcript variant 2, mRNA	cDNA FLJ12857 fis, clone NT2RP2003513, highly similar to Homo sapiens paralemmin (PALM), transcript variant 2, mRNA				B3KMX3	24	813
70	lcl|6158	331	0	HLA-C	MHC class I antigen (Fragment)	MHC class I antigen (Fragment) HLA-C	receptor binding | peptide antigen binding | peptide antigen binding | peptide antigen binding | TAP binding |	positive regulation of T cell mediated cytotoxicity | antigen processing and presentation of peptide antigen via MHC class I | antigen processing and presentation of exogenous peptide antigen via MHC class I, TAP-dependent | antigen processing and presentation of exogenous peptide antigen via MHC class I, TAP-independent | antigen processing and presentation of endogenous peptide antigen via MHC …	Golgi membrane | extracellular region | plasma membrane | integral component of plasma membrane | cell surface | cell surface | ER to Golgi transport vesicle membrane | phagocytic vesicle membrane | early endosome membrane | MHC class I protein complex | MHC class I protein complex | extracellular vesicular exosome | integral component of lumenal side of endoplasmic reticulum membrane |	I6SJ85	0	331
71	lcl|7554	80	0	PSMD5	26S proteasome non-ATPase regulatory subunit 5	26S proteasome non-ATPase regulatory subunit 5 PSMD5	protein binding | protein binding involved in protein folding |	G1/S transition of mitotic cell cycle | protein polyubiquitination | mitotic cell cycle | antigen processing and presentation of peptide antigen via MHC class I | antigen processing and presentation of exogenous peptide antigen via MHC class I, TAP-dependent | regulation of cellular amino acid metabolic process | apoptotic process | DNA damage response, signal transduction by p53 class mediator r…	proteasome complex | nucleoplasm | cytosol | proteasome regulatory particle, base subcomplex | proteasome accessory complex |	Q4VXG9	8	72
72	lcl|108424	41	0	HLA-B	MHC class I antigen (Fragment)	MHC class I antigen (Fragment) HLA-B	receptor binding | receptor binding | peptide antigen binding | peptide antigen binding | peptide antigen binding | TAP binding | TAP binding |	positive regulation of T cell mediated cytotoxicity | positive regulation of T cell mediated cytotoxicity | antigen processing and presentation of peptide antigen via MHC class I | antigen processing and presentation of peptide antigen via MHC class I | antigen processing and presentation of exogenous peptide antigen via MHC class I, TAP-dependent | antigen processing and presentation of exogenou…	Golgi membrane | plasma membrane | integral component of plasma membrane | cell surface | cell surface | ER to Golgi transport vesicle membrane | membrane | integral component of membrane | phagocytic vesicle membrane | early endosome membrane | MHC class I protein complex | MHC class I protein complex | extracellular vesicular exosome | integral component of lumenal side of endoplasmic reticulum…	C0KLS4 D7R0V8 E5G0Z8	0	41
73	lcl|73927	385	0	LUC7L3	Luc7-like protein 3 (Fragment)	Luc7-like protein 3 (Fragment) LUC7L3	DNA binding | mRNA binding | protein binding | poly(A) RNA binding |	mRNA splice site selection | RNA splicing |	nucleus | U1 snRNP | nuclear speck |	H0YA81	0	385
74	lcl|28119	15	0	ZNF559	Zinc finger protein 559 (Fragment)	Zinc finger protein 559 (Fragment) ZNF559	DNA binding | metal ion binding |	transcription, DNA-templated | regulation of transcription, DNA-templated |	nucleus |	K7EK98	0	15
75	lcl|154777	1634	0	PPP1R12B	Protein phosphatase 1 regulatory subunit 12B	Protein phosphatase 1 regulatory subunit 12B PPP1R12B	enzyme activator activity |	G2/M transition of mitotic cell cycle | mitotic cell cycle | regulation of muscle contraction | signal transduction | positive regulation of catalytic activity |	nucleoplasm | cytoplasm |	F8W8M3	80	1554
76	lcl|52507	477	0	RAI14	Ankycorbin (Fragment)	Ankycorbin (Fragment) RAI14			mitochondrion | cell cortex |	D6RE17	4	473
77	lcl|142803	194	0	YIPF3	Protein YIPF3 (Fragment)	Protein YIPF3 (Fragment) YIPF3		cell differentiation |	plasma membrane | integral component of membrane | transport vesicle |	D6RGY8	2	192
78	lcl|113626	149	0	HLA-DQB1	MHC class II antigen (Fragment)	MHC class II antigen (Fragment) HLA-DQB1	MHC class II receptor activity |	immunoglobulin production involved in immunoglobulin mediated immune response | humoral immune response mediated by circulating immunoglobulin | immune response | cytokine-mediated signaling pathway | antigen processing and presentation of exogenous peptide antigen via MHC class II | T cell costimulation | T cell receptor signaling pathway | interferon-gamma-mediated signaling pathway |	Golgi membrane | lysosomal membrane | plasma membrane | endosome membrane | ER to Golgi transport vesicle membrane | membrane | transport vesicle membrane | endocytic vesicle membrane | clathrin-coated endocytic vesicle membrane | trans-Golgi network membrane | MHC class II protein complex | integral component of lumenal side of endoplasmic reticulum membrane |	N0AA53	0	149
79	lcl|82281	1113	0	PHACTR1	Phosphatase and actin regulator	Phosphatase and actin regulator PHACTR1	actin binding | protein phosphatase inhibitor activity |	actomyosin structure organization | actin cytoskeleton reorganization | stress fiber assembly | cell motility |	nucleus | cytosol | cell junction | synapse |	F8W882	4	1109
80	lcl|112356	80	0	PAQR3	PREDICTED: progestin and adipoQ receptor family member 3 isoform X6	PREDICTED: progestin and adipoQ receptor family member 3 isoform X6 PAQR3	receptor activity |	negative regulation of protein phosphorylation | negative regulation of neuron projection development | negative regulation of peptidyl-serine phosphorylation | protein localization to Golgi apparatus | negative regulation of MAP kinase activity |	Golgi membrane | Golgi apparatus | integral component of membrane |	578808819	0	80
81	lcl|3011	250	0	MT1G	Metallothionein-1G	Metallothionein-1G MT1G	protein binding | zinc ion binding |	monocyte differentiation | cellular response to vascular endothelial growth factor stimulus | monocyte activation | negative regulation of growth | cellular response to cadmium ion | cellular response to copper ion | cellular response to zinc ion | cellular response to zinc ion |	nucleus | cytoplasm | perinuclear region of cytoplasm |	P13640	4	246
82	lcl|48598	427	0	PCBP2	Poly(rC)-binding protein 2	Poly(rC)-binding protein 2 PCBP2	DNA binding | RNA binding | protein binding | enzyme binding | ubiquitin protein ligase binding | poly(A) RNA binding |	mRNA splicing, via spliceosome | RNA splicing | gene expression | mRNA metabolic process | negative regulation of type I interferon production | proteasome-mediated ubiquitin-dependent protein catabolic process | innate immune response | negative regulation of defense response to virus | defense response to virus |	nucleus | nucleoplasm | cytoplasm | cytosol | ribonucleoprotein complex |	Q15366 193083108	0	427
83	lcl|33636	167	0	PSEN2	Presenilin-2	Presenilin-2 PSEN2	endopeptidase activity | aspartic-type endopeptidase activity | protein binding |	response to hypoxia | cell fate specification | somitogenesis | negative regulation of protein phosphorylation | hematopoietic progenitor cell differentiation | T cell activation involved in immune response | myeloid leukocyte differentiation | membrane protein ectodomain proteolysis | calcium ion transport | regulation of epidermal growth factor-activated receptor activity | Notch signaling path…	Golgi membrane | kinetochore | nuclear inner membrane | mitochondrial inner membrane | lysosomal membrane | endoplasmic reticulum | endoplasmic reticulum membrane | Golgi apparatus | centrosome | cytosol | plasma membrane | integral component of plasma membrane | cell cortex | cell surface | apical plasma membrane | Z disc | axon | growth cone | neuromuscular junction | ciliary rootlet | neuronal…	P49810 530366342 156105679	0	167
84	lcl|115222	381	0		V-ets erythroblastosis virus E26 oncogene homolog 1 (Avian)	V-ets erythroblastosis virus E26 oncogene homolog 1 (Avian)				Q5U0M2	0	381
85	lcl|86335	460	0	DKFZp686D0714	Adenylyl cyclase-associated protein	Adenylyl cyclase-associated protein DKFZp686D0714				Q5JPJ8	6	454
86	lcl|32877	616	0	NPTN	Neuroplastin	Neuroplastin NPTN	type 1 fibroblast growth factor receptor binding | cell adhesion molecule binding |	positive regulation of protein phosphorylation | homophilic cell adhesion | positive regulation of cytosolic calcium ion concentration | positive regulation of neuron projection development | positive regulation of fibroblast growth factor receptor signaling pathway | positive regulation of long-term neuronal synaptic plasticity | long-term synaptic potentiation |	integral component of membrane | presynaptic membrane |	F5GZD0	14	602
87	lcl|19289	213	0		cDNA FLJ13074 fis, clone NT2RP3001855, moderately similar to HOMEOBOX PROTEIN PKNOX1	cDNA FLJ13074 fis, clone NT2RP3001855, moderately similar to HOMEOBOX PROTEIN PKNOX1				Q9H921	2	211
88	lcl|40959	2092	0	ZFP62	Zinc finger protein 62 homolog	Zinc finger protein 62 homolog ZFP62	nucleic acid binding | metal ion binding |	transcription, DNA-templated | regulation of transcription, DNA-templated |	nucleus |	J3QSW3	2	2090
89	lcl|2647	757	0	LRRC48	Leucine rich repeat containing 48, isoform CRA_a	Leucine rich repeat containing 48, isoform CRA_a LRRC48			cytoplasm |	D3DXC5	4	753
90	lcl|762	269	0	ITLN1	Intelectin 1	Intelectin 1 ITLN1		positive regulation of protein phosphorylation | response to nematode | positive regulation of glucose import |	anchored component of membrane | brush border membrane | receptor complex | membrane raft | extracellular vesicular exosome |	Q5IWS5	0	269
91	lcl|92160	24	0	ND5	NADH-ubiquinone oxidoreductase chain 5	NADH-ubiquinone oxidoreductase chain 5 ND5				H9P242	16	8
92	lcl|48126	778	0	PNMA6A	Paraneoplastic antigen-like protein 6A	Paraneoplastic antigen-like protein 6A PNMA6A				P0CW24 P0C5W0 187607308	0	778
93	lcl|57351	1972	0	SREBF1	Sterol regulatory element-binding protein 1	Sterol regulatory element-binding protein 1 SREBF1	DNA binding | chromatin binding | sequence-specific DNA binding transcription factor activity | protein binding | protein kinase binding | protein complex binding | sterol response element binding | sequence-specific DNA binding | protein dimerization activity |	negative regulation of transcription from RNA polymerase II promoter | regulation of heart rate by chemical signal | transcription, DNA-templated | regulation of transcription from RNA polymerase II promoter | lipid metabolic process | aging | cholesterol metabolic process | insulin receptor signaling pathway | lipid biosynthetic process | cellular response to starvation | response to glucose | p…	Golgi membrane | nucleus | nuclear envelope | nucleoplasm | cytoplasm | endoplasmic reticulum | endoplasmic reticulum membrane | cytosol | ER to Golgi transport vesicle membrane | integral component of membrane | protein complex |	P36956 22547195	23	1949
94	lcl|152620	257	0	ARMC6	Armadillo repeat-containing protein 6 (Fragment)	Armadillo repeat-containing protein 6 (Fragment) ARMC6				F5GWV0	0	257
95	lcl|137694	62	0	HLA-B	MHC class I antigen (Fragment)	MHC class I antigen (Fragment) HLA-B	receptor binding | receptor binding | peptide antigen binding | peptide antigen binding | peptide antigen binding | TAP binding | TAP binding |	positive regulation of T cell mediated cytotoxicity | positive regulation of T cell mediated cytotoxicity | antigen processing and presentation of peptide antigen via MHC class I | antigen processing and presentation of peptide antigen via MHC class I | antigen processing and presentation of exogenous peptide antigen via MHC class I, TAP-dependent | antigen processing and presentation of exogenou…	Golgi membrane | plasma membrane | integral component of plasma membrane | cell surface | cell surface | ER to Golgi transport vesicle membrane | membrane | integral component of membrane | phagocytic vesicle membrane | early endosome membrane | MHC class I protein complex | MHC class I protein complex | extracellular vesicular exosome | integral component of lumenal side of endoplasmic reticulum…	W0YKF2	0	62
96	lcl|117327	39	0	HLA-Cw	MHC class I antigen (Fragment)	MHC class I antigen (Fragment) HLA-Cw				C0M128 D3U744	0	39
97	lcl|140956	630	0	PHOSPHO1	phosphoethanolamine/phosphocholine phosphatase isoform 1	phosphoethanolamine/phosphocholine phosphatase isoform 1 PHOSPHO1	pyrophosphatase activity | metal ion binding | phosphocholine phosphatase activity | phosphoethanolamine phosphatase activity |	endochondral ossification | phospholipid metabolic process | phosphatidylethanolamine biosynthetic process | phosphatidylcholine biosynthetic process | dephosphorylation | regulation of bone mineralization | bone mineralization involved in bone maturation | small molecule metabolic process | glycerophospholipid biosynthetic process |	cytosol |	219689097	14	616
98	lcl|88052	1992	0	INPP5J	PREDICTED: phosphatidylinositol 4,5-bisphosphate 5-phosphatase A isoform X1	PREDICTED: phosphatidylinositol 4,5-bisphosphate 5-phosphatase A isoform X1 INPP5J	inositol-polyphosphate 5-phosphatase activity | SH3 domain binding | phosphatidylinositol-3,4,5-trisphosphate 5-phosphatase activity | inositol-1,4,5-trisphosphate 5-phosphatase activity | inositol-1,3,4,5-tetrakisphosphate 5-phosphatase activity |	phospholipid metabolic process | phosphatidylinositol biosynthetic process | negative regulation of neuron projection development | negative regulation of microtubule polymerization | negative regulation of peptidyl-serine phosphorylation | inositol phosphate metabolic process | small molecule metabolic process | phosphatidylinositol dephosphorylation |	ruffle | cytoplasm | cytosol | plasma membrane | growth cone | dendritic shaft |	578837172	93	1899
99	lcl|126064	710	0	TP53TG5	PREDICTED: TP53-target gene 5 protein isoform X1	PREDICTED: TP53-target gene 5 protein isoform X1 TP53TG5	molecular_function |	negative regulation of cell growth | intracellular signal transduction |	nucleus | cytoplasm |	578835957	18	692
100	lcl|97518	515	0	TUBGCP6	Gamma-tubulin complex component 6 (Fragment)	Gamma-tubulin complex component 6 (Fragment) TUBGCP6	microtubule binding |	G2/M transition of mitotic cell cycle | mitotic cell cycle | microtubule nucleation |	spindle pole | centrosome | cytosol | microtubule | gamma-tubulin ring complex |	H7C2H5	28	487
101	lcl|32887	238	0	PRSS3	Trypsin-3 (Fragment)	Trypsin-3 (Fragment) PRSS3	serine-type endopeptidase activity | calcium ion binding | protein binding | serine-type peptidase activity |	proteolysis | proteolysis | vitamin metabolic process | water-soluble vitamin metabolic process | digestion | cobalamin metabolic process | zymogen activation | endothelial cell migration | small molecule metabolic process | innate immune response |	extracellular region | extracellular space |	B1AN99	0	238
102	lcl|46010	121	0	hCG_1778670	HCG1778670	HCG1778670 hCG_1778670				Q9NW77	0	121
103	lcl|124534	43	0	ACT	Actin-like protein (Fragment)	Actin-like protein (Fragment) ACT				Q562R3	0	43
104	lcl|29827	553	0	ARFGAP1	ADP-ribosylation factor GTPase-activating protein 1 (Fragment)	ADP-ribosylation factor GTPase-activating protein 1 (Fragment) ARFGAP1	GTPase activator activity | protein binding | ARF GTPase activator activity | zinc ion binding |	retrograde vesicle-mediated transport, Golgi to ER | activation of signaling protein activity involved in unfolded protein response | protein transport | endoplasmic reticulum unfolded protein response | regulation of ARF GTPase activity | positive regulation of GTPase activity | cellular protein metabolic process | COPI coating of Golgi vesicle | membrane organization |	cytosol | Golgi-associated vesicle membrane | synapse |	E5RHC5	8	545
105	lcl|106597	516	0	STARD3	stAR-related lipid transfer protein 3 isoform 3	stAR-related lipid transfer protein 3 isoform 3 STARD3	cholesterol binding | cholesterol transporter activity |	lipid metabolic process | progesterone biosynthetic process | mitochondrial transport | steroid metabolic process | cholesterol metabolic process |	cytoplasm | mitochondrion | lysosomal membrane | integral component of membrane | late endosome membrane |	260763906	18	498
106	lcl|72571	106	0	DES	Desmin (Fragment)	Desmin (Fragment) DES	structural constituent of cytoskeleton | protein binding | cytoskeletal protein binding | identical protein binding |	muscle contraction | cytoskeleton organization | regulation of heart contraction | muscle filament sliding |	cytosol | intermediate filament | fascia adherens | Z disc | neuromuscular junction | sarcolemma |	L7R9R4	0	106
107	lcl|7142	89	0	HLA-DRB1	MHC class II antigen (Fragment)	MHC class II antigen (Fragment) HLA-DRB1	MHC class II protein complex binding | MHC class II receptor activity | MHC class II receptor activity | peptide antigen binding |	immunoglobulin production involved in immunoglobulin mediated immune response | immunoglobulin production involved in immunoglobulin mediated immune response | inflammatory response to antigenic stimulus | humoral immune response mediated by circulating immunoglobulin | humoral immune response mediated by circulating immunoglobulin | immune response | immune response | detection of bacterium | cy…	Golgi membrane | lysosomal membrane | lysosomal membrane | plasma membrane | integral component of plasma membrane | external side of plasma membrane | ER to Golgi transport vesicle membrane | membrane | transport vesicle membrane | endocytic vesicle membrane | clathrin-coated endocytic vesicle membrane | late endosome membrane | trans-Golgi network membrane | MHC class II protein complex | extra…	Q9TQ70	0	89
108	lcl|134687	363	0		cDNA FLJ52909, highly similar to SH3-containing GRB2-like protein 2 (EC 2.3.1.-)	cDNA FLJ52909, highly similar to SH3-containing GRB2-like protein 2 (EC 2.3.1.-)				B7Z7W3	4	359
109	lcl|50454	463	0	ETNK1	Ethanolamine kinase 1	Ethanolamine kinase 1 ETNK1	ethanolamine kinase activity | ATP binding |	phospholipid metabolic process | phosphatidylethanolamine biosynthetic process | phosphatidylethanolamine biosynthetic process | phosphatidylethanolamine biosynthetic process | small molecule metabolic process | glycerophospholipid biosynthetic process |	cytosol |	Q9HBU6 10092615	14	449
110	lcl|17281	1035	0	ARHGAP10	PREDICTED: rho GTPase-activating protein 10 isoform X3	PREDICTED: rho GTPase-activating protein 10 isoform X3 ARHGAP10	Rho GTPase activator activity | protein binding |	apoptotic process | cytoskeleton organization | small GTPase mediated signal transduction | regulation of apoptotic process | negative regulation of apoptotic process | regulation of small GTPase mediated signal transduction |	cytosol | plasma membrane | perinuclear region of cytoplasm |	530378149	28	1007
111	lcl|66995	436	0		cDNA FLJ33094 fis, clone TRACH2000703, highly similar to Mitochondrial-processing peptidase subunit beta, mitochondrial (EC 3.4.24.64)	cDNA FLJ33094 fis, clone TRACH2000703, highly similar to Mitochondrial-processing peptidase subunit beta, mitochondrial (EC 3.4.24.64)				B3KQ85	12	424
112	lcl|135472	368	0	ZBTB48	Zinc finger and BTB domain-containing protein 48 (Fragment)	Zinc finger and BTB domain-containing protein 48 (Fragment) ZBTB48	DNA binding | sequence-specific DNA binding transcription factor activity | metal ion binding |	transcription, DNA-templated |		Q5SY21	6	362
113	lcl|41006	7	0	CYP4f12	Cytochrome P450 4F12 (Fragment)	Cytochrome P450 4F12 (Fragment) CYP4f12	iron ion binding | arachidonic acid epoxygenase activity | alkane 1-monooxygenase activity | heme binding | vitamin-K-epoxide reductase (warfarin-sensitive) activity | leukotriene-B4 20-monooxygenase activity | aromatase activity |	very long-chain fatty acid metabolic process | long-chain fatty acid metabolic process | renal water homeostasis | pressure natriuresis | xenobiotic metabolic process | drug metabolic process | arachidonic acid metabolic process | epoxygenase P450 pathway | negative regulation of blood coagulation | leukotriene B4 catabolic process | vitamin E metabolic process | vitamin K biosynthetic process | …	cytoplasm | endoplasmic reticulum membrane | integral component of membrane | apical plasma membrane | intracellular membrane-bounded organelle |	Q6QF45	4	3
114	lcl|88732	191	0	GDAP1	Ganglioside-induced differentiation-associated protein 1	Ganglioside-induced differentiation-associated protein 1 GDAP1		mitochondrial fission | protein targeting to mitochondrion | cell death | response to retinoic acid |	nucleus | integral component of mitochondrial outer membrane |	E5RGI2	0	191
115	lcl|156324	173	0		Cryocrystalglobulin CC2 heavy chain variable region (Fragment)	Cryocrystalglobulin CC2 heavy chain variable region (Fragment)				B1N7B7	10	163
116	lcl|79235	108	0	HLA-B	MHC class I antigen (Fragment)	MHC class I antigen (Fragment) HLA-B	receptor binding | receptor binding | peptide antigen binding | peptide antigen binding | peptide antigen binding | TAP binding | TAP binding |	positive regulation of T cell mediated cytotoxicity | positive regulation of T cell mediated cytotoxicity | antigen processing and presentation of peptide antigen via MHC class I | antigen processing and presentation of peptide antigen via MHC class I | antigen processing and presentation of exogenous peptide antigen via MHC class I, TAP-dependent | antigen processing and presentation of exogenou…	Golgi membrane | plasma membrane | integral component of plasma membrane | cell surface | cell surface | ER to Golgi transport vesicle membrane | membrane | integral component of membrane | phagocytic vesicle membrane | early endosome membrane | MHC class I protein complex | MHC class I protein complex | extracellular vesicular exosome | integral component of lumenal side of endoplasmic reticulum…	I2B2Y1	0	108
117	lcl|21006	35	0	DRD4	Dopamine D4 receptor (Fragment)	Dopamine D4 receptor (Fragment) DRD4	dopamine neurotransmitter receptor activity, coupled via Gi/Go | dopamine neurotransmitter receptor activity, coupled via Gi/Go | dopamine neurotransmitter receptor activity | protein binding | drug binding | potassium channel regulator activity | SH3 domain binding | dopamine binding | identical protein binding |	activation of MAPK activity | behavioral fear response | synaptic transmission, dopaminergic | response to amphetamine | cellular calcium ion homeostasis | negative regulation of adenylate cyclase activity | adenylate cyclase-inhibiting dopamine receptor signaling pathway | dopamine receptor signaling pathway | short-term memory | circadian rhythm | adult locomotory behavior | olfactory learning …	plasma membrane | integral component of plasma membrane | cell cortex | vesicle membrane | membrane | neuronal cell body | terminal bouton | dendritic spine |	A4LBB9	0	35
118	lcl|9786	61	0	COX2	Cytochrome c oxidase subunit 2	Cytochrome c oxidase subunit 2 COX2				A6Z6E8	0	61
119	lcl|100828	3543	0	SHANK2	PREDICTED: SH3 and multiple ankyrin repeat domains protein 2 isoform X1	PREDICTED: SH3 and multiple ankyrin repeat domains protein 2 isoform X1 SHANK2	protein binding | SH3 domain binding | GKAP/Homer scaffold activity | ionotropic glutamate receptor binding |	synapse assembly | learning | adult behavior | social behavior | long-term synaptic potentiation | long term synaptic depression | vocalization behavior |	photoreceptor outer segment | photoreceptor inner segment | cellular_component | neurofilament | plasma membrane | ionotropic glutamate receptor complex | postsynaptic density | apical plasma membrane | cell junction | growth cone | brush border membrane | neuron projection | neuronal cell body | dendritic spine | postsynaptic membrane | ciliary membrane |	530432959 226817313	68	3475
120	lcl|143996	423	0	ODF2	ODF2 protein (Fragment)	ODF2 protein (Fragment) ODF2	structural molecule activity | protein binding |	G2/M transition of mitotic cell cycle | mitotic cell cycle | multicellular organismal development | spermatid development |	spindle pole | outer dense fiber | nucleus | centrosome | centriole | cytosol | microtubule |	Q6PJQ8	4	419
121	lcl|26292	489	0	IRF2	Interferon regulatory factor 2 (Fragment)	Interferon regulatory factor 2 (Fragment) IRF2	regulatory region DNA binding | DNA binding | sequence-specific DNA binding transcription factor activity | protein binding |	negative regulation of transcription from RNA polymerase II promoter | transcription, DNA-templated | regulation of transcription, DNA-templated | blood coagulation | cell proliferation | cytokine-mediated signaling pathway | interferon-gamma-mediated signaling pathway | type I interferon signaling pathway |	nucleoplasm | cytosol |	D6R9N5	4	485
122	lcl|31945	542	0	RGN	regucalcin isoform 2	regucalcin isoform 2 RGN	gluconolactonase activity | calcium ion binding | calcium ion binding | zinc ion binding | enzyme regulator activity |	cellular calcium ion homeostasis | L-ascorbic acid biosynthetic process | positive regulation of ATPase activity | regulation of calcium-mediated signaling |	nucleus | cytoplasm |	544583589	24	518
123	lcl|61928	150	0	CCR5	C-C chemokine receptor type 5	C-C chemokine receptor type 5 CCR5	actin binding | phosphatidylinositol phospholipase C activity | chemokine receptor activity | protein binding | coreceptor activity | C-C chemokine receptor activity | C-C chemokine receptor activity | C-C chemokine binding | chemokine (C-C motif) ligand 5 binding |	MAPK cascade | blood vessel remodeling | dendritic cell chemotaxis | calcium ion transport | chemotaxis | inflammatory response | immune response | cellular defense response | cell surface receptor signaling pathway | G-protein coupled receptor signaling pathway | positive regulation of cytosolic calcium ion concentration | cell-cell signaling | release of sequestered calcium ion into cytosol by …	cytoplasm | endosome | plasma membrane | integral component of plasma membrane | external side of plasma membrane | cell surface |	H9MHP9	0	150
124	lcl|91427	219	0	OSBPL1A	Oxysterol-binding protein-related protein 1	Oxysterol-binding protein-related protein 1 OSBPL1A	protein binding | phospholipid binding | cholesterol binding |	lipid transport | cholesterol metabolic process | vesicle-mediated transport | antigen processing and presentation of exogenous peptide antigen via MHC class II |	intracellular | lysosomal membrane | late endosome | extracellular vesicular exosome |	E7ER58	0	219
125	lcl|144135	738	0	GP2	PREDICTED: pancreatic secretory granule membrane major glycoprotein GP2 isoform X4	PREDICTED: pancreatic secretory granule membrane major glycoprotein GP2 isoform X4 GP2	antigen binding |	antigen transcytosis by M cells in mucosal-associated lymphoid tissue |	extracellular region | apical plasma membrane | anchored component of membrane |	530407935	4	734
126	lcl|42527	59	0	FARP1	FERM, RhoGEF and pleckstrin domain-containing protein 1 isoform 2	FERM, RhoGEF and pleckstrin domain-containing protein 1 isoform 2 FARP1	Rho guanyl-nucleotide exchange factor activity | cytoskeletal protein binding | Rac guanyl-nucleotide exchange factor activity | Rac GTPase binding |	synapse assembly | negative regulation of phosphatase activity | regulation of Rac GTPase activity | regulation of Rho GTPase activity | dendrite morphogenesis |	cytosol | cytoskeleton | cell junction | filopodium | dendrite | extrinsic component of cytoplasmic side of plasma membrane | dendritic spine | synapse |	159032537	0	59
127	lcl|102967	462	0	CEBPE	CCAAT/enhancer-binding protein epsilon	CCAAT/enhancer-binding protein epsilon CEBPE	sequence-specific DNA binding transcription factor activity | protein homodimerization activity | sequence-specific DNA binding | protein heterodimerization activity |	transcription, DNA-templated | phagocytosis | defense response | positive regulation of gene expression | macrophage differentiation | cytokine biosynthetic process | defense response to bacterium | cellular response to lipopolysaccharide |		Q15744 28872800	22	440
128	lcl|66138	86	0	ND2	NADH-ubiquinone oxidoreductase chain 2	NADH-ubiquinone oxidoreductase chain 2 ND2				G9LJA4	16	70
129	lcl|53295	143	0	EIF3D	Eukaryotic translation initiation factor 3 subunit D (Fragment)	Eukaryotic translation initiation factor 3 subunit D (Fragment) EIF3D	translation initiation factor activity | translation initiation factor activity | protein binding | poly(A) RNA binding |	formation of translation preinitiation complex | formation of translation initiation complex | translation | translational initiation | translational initiation | translational initiation | regulation of translational initiation | gene expression | cellular protein metabolic process |	cytosol | eukaryotic translation initiation factor 3 complex | eukaryotic 43S preinitiation complex | eukaryotic 48S preinitiation complex |	B0QYA8	0	143
130	lcl|67089	173	0	POLR2H	DNA-directed RNA polymerases I, II, and III subunit RPABC3 (Fragment)	DNA-directed RNA polymerases I, II, and III subunit RPABC3 (Fragment) POLR2H	RNA polymerase I activity | RNA polymerase II activity | RNA polymerase III activity | DNA binding |	mRNA splicing, via spliceosome | DNA repair | transcription-coupled nucleotide-excision repair | nucleotide-excision repair | transcription from RNA polymerase I promoter | transcription initiation from RNA polymerase I promoter | transcription elongation from RNA polymerase I promoter | termination of RNA polymerase I transcription | transcription from RNA polymerase II promoter | transcription …	nucleus | nucleoplasm | DNA-directed RNA polymerase II, core complex | DNA-directed RNA polymerase III complex | DNA-directed RNA polymerase I complex | cytosol |	C9JLU1	4	169
131	lcl|137929	520	0	TMEM55A	Type 2 phosphatidylinositol 4,5-bisphosphate 4-phosphatase (Fragment)	Type 2 phosphatidylinositol 4,5-bisphosphate 4-phosphatase (Fragment) TMEM55A	hydrolase activity |		lysosomal membrane | integral component of membrane | late endosome membrane |	E5RFT4	16	504
132	lcl|85277	922	0	VIT	vitrin isoform 4 precursor	vitrin isoform 4 precursor VIT	glycosaminoglycan binding |	positive regulation of cell-substrate adhesion | extracellular matrix organization |	interstitial matrix |	295789109	2	920
133	lcl|95004	1611	0	CADPS	PREDICTED: calcium-dependent secretion activator 1 isoform X4	PREDICTED: calcium-dependent secretion activator 1 isoform X4 CADPS	protein binding | lipid binding | metal ion binding |	exocytosis | protein transport | vesicle organization | synaptic vesicle priming | catecholamine secretion |	cytosol | cell junction | cytoplasmic vesicle membrane | synapse |	578806657	14	1597
134	lcl|92102	384	0		cDNA FLJ61423, highly similar to Interleukin-6	cDNA FLJ61423, highly similar to Interleukin-6				B4DVM1	6	378
135	lcl|46592	359	0	IL10RA	Interleukin 10 alpha receptor	Interleukin 10 alpha receptor IL10RA	signal transducer activity | receptor activity | interleukin-10 receptor activity | protein binding | interleukin-10 binding |	signal transduction | cytokine-mediated signaling pathway | response to lipopolysaccharide |	cytoplasm | plasma membrane | integral component of membrane |	H2DF05	2	357
136	lcl|22721	139	0	AFMID	AFMID protein	AFMID protein AFMID	arylformamidase activity |	tryptophan catabolic process | tryptophan catabolic process to kynurenine | 'de novo' NAD biosynthetic process from tryptophan | cellular nitrogen compound metabolic process | small molecule metabolic process |	nucleus | cytosol |	A5PLM3	12	127
137	lcl|35561	1044	0		cDNA FLJ61275, highly similar to Probable phospholipid-transporting ATPase IA(EC 3.6.3.1)	cDNA FLJ61275, highly similar to Probable phospholipid-transporting ATPase IA(EC 3.6.3.1)				B4DII6	8	1036
138	lcl|70298	427	0	GLRA2	glycine receptor subunit alpha-2 isoform C	glycine receptor subunit alpha-2 isoform C GLRA2	glycine binding | extracellular-glycine-gated chloride channel activity | transmitter-gated ion channel activity |	ion transport | neuropeptide signaling pathway | synapse assembly | ion transmembrane transport | transmembrane transport | chloride transmembrane transport |	plasma membrane | integral component of plasma membrane | cell junction | chloride channel complex | postsynaptic membrane |	284925161	18	409
139	lcl|50574	659	0	RTN2	Reticulon-2	Reticulon-2 RTN2	protein binding |	cell death | regulation of glucose import | intracellular protein transmembrane transport |	endoplasmic reticulum | terminal cisterna | integral component of endoplasmic reticulum membrane | T-tubule |	O75298 5032055	26	633
140	lcl|74744	424	0	FUT1	Fucosyltransferase 1	Fucosyltransferase 1 FUT1	galactoside 2-alpha-L-fucosyltransferase activity | fucosyltransferase activity |	carbohydrate metabolic process | protein glycosylation | protein glycosylation | L-fucose catabolic process |	Golgi apparatus | integral component of plasma membrane | membrane | Golgi cisterna membrane |	I7C6Y9	0	424
141	lcl|120315	183	0	THBS3	Thrombospondin-3	Thrombospondin-3 THBS3	calcium ion binding | heparin binding |	growth plate cartilage development | cell-matrix adhesion | ossification involved in bone maturation | bone trabecula formation |	extracellular region | perinuclear region of cytoplasm |	F5H4Z8	4	179
142	lcl|141221	192	0	XPOT	Exportin-T (Fragment)	Exportin-T (Fragment) XPOT	tRNA binding | Ran GTPase binding |	tRNA export from nucleus | intracellular protein transport |	nuclear pore | nucleoplasm | cytoplasm |	F8WDU6	0	192
143	lcl|99653	108	0	IGSF23	Immunoglobulin superfamily member 23 (Fragment)	Immunoglobulin superfamily member 23 (Fragment) IGSF23			integral component of membrane |	H0Y773	0	108
144	lcl|23880	480	0	C2orf62	Uncharacterized protein C2orf62	Uncharacterized protein C2orf62 C2orf62				Q7Z7H3 38348396	12	468
145	lcl|116086	172	0	ZFAND6	AN1-type zinc finger protein 6	AN1-type zinc finger protein 6 ZFAND6	molecular_function | DNA binding | protein binding | zinc ion binding | polyubiquitin binding |	protein targeting to peroxisome | apoptotic process | negative regulation of apoptotic process | regulation of I-kappaB kinase/NF-kappaB signaling | cellular response to tumor necrosis factor |	cellular_component | cytoplasm |	H0YK54	0	172
146	lcl|81108	444	0	KLF4	Krueppel-like factor 4 (Fragment)	Krueppel-like factor 4 (Fragment) KLF4	core promoter proximal region sequence-specific DNA binding | sequence-specific DNA binding transcription factor recruiting transcription factor activity | RNA polymerase II core promoter proximal region sequence-specific DNA binding transcription factor activity involved in positive regulation of transcription | RNA polymerase II transcription factor binding | RNA polymerase II transcription fac…	negative regulation of transcription from RNA polymerase II promoter | transcription from RNA polymerase II promoter | mesodermal cell fate determination | negative regulation of cell proliferation | epidermal cell differentiation | negative regulation of phosphatidylinositol 3-kinase signaling | negative regulation of muscle hyperplasia | stem cell maintenance | post-embryonic camera-type eye de…	nuclear chromatin | transcription factor complex |	Q5T3J6	14	430
147	lcl|116814	144	0	KIR2DL3	Natural killer-associated transcript 2 (Fragment)	Natural killer-associated transcript 2 (Fragment) KIR2DL3	antigen binding | receptor activity | protein binding |	immune response | regulation of immune response |	plasma membrane | integral component of plasma membrane | integral component of membrane |	Q9UPI8	0	144
148	lcl|129506	131	0	CD200	PREDICTED: OX-2 membrane glycoprotein isoform X6	PREDICTED: OX-2 membrane glycoprotein isoform X6 CD200	protein binding |	regulation of immune response |	plasma membrane | integral component of plasma membrane |	530374682	0	131
149	lcl|25913	560	0	RORA	PREDICTED: nuclear receptor ROR-alpha isoform X1	PREDICTED: nuclear receptor ROR-alpha isoform X1 RORA	transcription corepressor binding | transcription coactivator binding | DNA binding | sequence-specific DNA binding transcription factor activity | steroid hormone receptor activity | ligand-activated sequence-specific DNA binding RNA polymerase II transcription factor activity | protein binding | transcription factor binding | oxysterol binding | zinc ion binding | sequence-specific DNA binding …	angiogenesis | regulation of transcription, DNA-templated | transcription initiation from RNA polymerase II promoter | xenobiotic metabolic process | nitric oxide biosynthetic process | regulation of smoothened signaling pathway | gene expression | positive regulation vascular endothelial growth factor production | regulation of glucose metabolic process | regulation of steroid metabolic process …	nucleus | nucleoplasm |	530406277	0	560
150	lcl|26976	332	0	ZNF18	Zinc finger protein 18 (Fragment)	Zinc finger protein 18 (Fragment) ZNF18	sequence-specific DNA binding RNA polymerase II transcription factor activity | DNA binding | metal ion binding |	regulation of transcription from RNA polymerase II promoter | transcription from RNA polymerase II promoter |	nucleus |	J3KTA0	0	332
151	lcl|156572	565	0	CTTN	Src substrate cortactin (Fragment)	Src substrate cortactin (Fragment) CTTN	protein binding |		ruffle | cytoplasm | cytoplasm | cytoskeleton | cell cortex | lamellipodium | lamellipodium | dendritic spine |	H7C314	0	565
152	lcl|26348	53	0	HLA-DRB1	MHC class II antigen (Fragment)	MHC class II antigen (Fragment) HLA-DRB1	MHC class II protein complex binding | MHC class II receptor activity | MHC class II receptor activity | peptide antigen binding |	immunoglobulin production involved in immunoglobulin mediated immune response | immunoglobulin production involved in immunoglobulin mediated immune response | inflammatory response to antigenic stimulus | humoral immune response mediated by circulating immunoglobulin | humoral immune response mediated by circulating immunoglobulin | immune response | immune response | detection of bacterium | cy…	Golgi membrane | lysosomal membrane | lysosomal membrane | plasma membrane | integral component of plasma membrane | external side of plasma membrane | ER to Golgi transport vesicle membrane | membrane | transport vesicle membrane | endocytic vesicle membrane | clathrin-coated endocytic vesicle membrane | late endosome membrane | trans-Golgi network membrane | MHC class II protein complex | extra…	C8XTK5 D2DL45 D3U4E4 E2D5U6 E3SWQ3 E3SWQ6 E3SWQ9	0	53
153	lcl|68911	236	0	NUDT3	Diphosphoinositol polyphosphate phosphohydrolase 1	Diphosphoinositol polyphosphate phosphohydrolase 1 NUDT3	magnesium ion binding | diphosphoinositol-polyphosphate diphosphatase activity | inositol diphosphate tetrakisphosphate diphosphatase activity | inositol-1-diphosphate-2,3,4,5,6-pentakisphosphate diphosphatase activity | inositol-3-diphosphate-1,2,4,5,6-pentakisphosphate diphosphatase activity | inositol-5-diphosphate-1,2,3,4,6-pentakisphosphate diphosphatase activity | inositol-1,5-bisdiphosphat…	cell-cell signaling | diadenosine polyphosphate catabolic process | inositol phosphate metabolic process | small molecule metabolic process | diphosphoinositol polyphosphate catabolic process |	cytosol |	O95989 5729804	0	236
154	lcl|123008	17	0	SNRPC	U1 small nuclear ribonucleoprotein C	U1 small nuclear ribonucleoprotein C SNRPC	single-stranded RNA binding | mRNA binding | protein binding | zinc ion binding | U1 snRNA binding | protein homodimerization activity | poly(A) RNA binding |	spliceosomal snRNP assembly | mRNA 5'-splice site recognition | mRNA splicing, via spliceosome |	commitment complex | U1 snRNP | Cajal body | U2-type prespliceosome |	Q5TAL2	0	17
155	lcl|76265	56	0		Tubby isoform b variant (Fragment)	Tubby isoform b variant (Fragment)				Q59F43	0	56
156	lcl|1033	1903	0	WAPAL	PREDICTED: wings apart-like protein homolog isoform X2	PREDICTED: wings apart-like protein homolog isoform X2 WAPAL	protein binding |	mitotic cell cycle | mitosis | negative regulation of DNA replication | response to toxic substance | viral process | negative regulation of chromatin binding | negative regulation of sister chromatid cohesion | protein localization to chromatin | regulation of cohesin localization to chromatin |	chromosome, centromeric region | chromatin | synaptonemal complex | nucleus | nucleoplasm | chromosome | cytoplasm | cytosol | cohesin complex |	578819169	24	1879
157	lcl|137849	1448	0	ACBD5	PREDICTED: acyl-CoA-binding domain-containing protein 5 isoform X1	PREDICTED: acyl-CoA-binding domain-containing protein 5 isoform X1 ACBD5	fatty-acyl-CoA binding | molecular_function | lipid binding |	transport | biological_process |	peroxisomal membrane | integral component of membrane |	578818629	40	1408
158	lcl|81823	117	0	VPS51	Vacuolar protein sorting-associated protein 51 homolog (Fragment)	Vacuolar protein sorting-associated protein 51 homolog (Fragment) VPS51	molecular_function | protein binding |	lipid transport | autophagy | protein transport | retrograde transport, endosome to Golgi |	GARP complex | Golgi apparatus | integral component of membrane |	H0YCB7	0	117
159	lcl|118338	256	0	PLEKHB1	Pleckstrin homology domain-containing family B member 1 (Fragment)	Pleckstrin homology domain-containing family B member 1 (Fragment) PLEKHB1	signal transducer activity | protein C-terminus binding | protein homodimerization activity |	multicellular organismal development | phototransduction | regulation of cell differentiation |	cytoplasm | integral component of membrane |	F5H866	4	252
160	lcl|155899	750	0	RAB34	Ras-related protein Rab-34, isoform NARR	Ras-related protein Rab-34, isoform NARR RAB34	protein binding | GTP binding |	small GTPase mediated signal transduction | antigen processing and presentation | lysosome localization | Golgi to plasma membrane protein transport | macropinocytosis | protein localization to plasma membrane | phagosome maturation | phagosome-lysosome fusion |	ruffle | Golgi apparatus | Golgi stack | phagocytic vesicle membrane | vesicle | Golgi cisterna | phagocytic vesicle | perinuclear region of cytoplasm | extracellular vesicular exosome |	A8MYQ9	4	746
161	lcl|36896	156	0	DLC1	Rho GTPase-activating protein 7 (Fragment)	Rho GTPase-activating protein 7 (Fragment) DLC1	Rho GTPase activator activity | Rho GTPase activator activity | protein binding | lipid binding | Rac GTPase activator activity | SH2 domain binding |	neural tube closure | heart morphogenesis | apoptotic process | activation of cysteine-type endopeptidase activity involved in apoptotic process | small GTPase mediated signal transduction | negative regulation of cell proliferation | negative regulation of cell proliferation | regulation of cell shape | hindbrain morphogenesis | actin cytoskeleton organization | negative regulation of cell migra…	nucleus | cytoplasm | cytosol | caveola | focal adhesion |	R4GMP5	2	154
162	lcl|128529	1430	0		cDNA FLJ61233, highly similar to Kinesin light chain 1	cDNA FLJ61233, highly similar to Kinesin light chain 1				B4DGB3	2	1428
163	lcl|123160	148	0	DTNA	Dystrobrevin alpha (Fragment)	Dystrobrevin alpha (Fragment) DTNA	calcium ion binding | protein binding | zinc ion binding |	striated muscle contraction | signal transduction | synaptic transmission | neuromuscular synaptic transmission |	cytoplasm | plasma membrane | cell junction | protein complex | synapse |	K7ENJ7	0	148
164	lcl|63042	370	0	ABO	ABO glycosyltransferase (Fragment)	ABO glycosyltransferase (Fragment) ABO	glycoprotein-fucosylgalactoside alpha-N-acetylgalactosaminyltransferase activity | fucosylgalactoside 3-alpha-galactosyltransferase activity | metal ion binding |	protein glycosylation |	extracellular region | integral component of membrane | Golgi cisterna membrane |	Q6L648	0	370
165	lcl|100801	374	0	CELF2-AS1	Putative uncharacterized protein CELF2-AS1	Putative uncharacterized protein CELF2-AS1 CELF2-AS1			extracellular region |	Q8N7Q2	6	368
166	lcl|51605	1676	0	NFRKB	PREDICTED: nuclear factor related to kappa-B-binding protein isoform X1	PREDICTED: nuclear factor related to kappa-B-binding protein isoform X1 NFRKB	protease binding | DNA binding | protein binding |	DNA repair | DNA recombination | regulation of transcription, DNA-templated | transcription from RNA polymerase II promoter | inflammatory response |	nucleus | Ino80 complex | Ino80 complex |	578822215	10	1666
167	lcl|39925	1671	0	LOC102724752	PREDICTED: serine/arginine repetitive matrix protein 1-like	PREDICTED: serine/arginine repetitive matrix protein 1-like LOC102724752				578813261	40	1631
168	lcl|110012	989	0	DISC1	Disrupted in schizophrenia 1 isoform 41	Disrupted in schizophrenia 1 isoform 41 DISC1	protein binding |	microtubule cytoskeleton organization | neuron migration | positive regulation of neuroblast proliferation | protein localization | regulation of neuron projection development | cerebral cortex radially oriented cell migration | cell proliferation in forebrain | positive regulation of Wnt signaling pathway | TOR signaling | mitochondrial calcium ion homeostasis | canonical Wnt signaling pathway |…	mitochondrion | centrosome | microtubule | postsynaptic density | cell junction | postsynaptic membrane |	C4P0C8 257153295	98	891
169	lcl|152212	663	0	CYTH2	PREDICTED: cytohesin-2 isoform X1	PREDICTED: cytohesin-2 isoform X1 CYTH2	ARF guanyl-nucleotide exchange factor activity | ARF guanyl-nucleotide exchange factor activity | protein binding | lipid binding | inositol 1,4,5 trisphosphate binding |	endocytosis | vesicle-mediated transport | actin cytoskeleton organization | regulation of cell adhesion | regulation of ARF protein signal transduction | regulation of GTPase activity | regulation of GTPase activity | regulation of GTPase activity |	cytoplasm | trans-Golgi network | plasma membrane | membrane |	578835125	0	663
170	lcl|132378	447	0		cDNA FLJ61272, highly similar to Homo sapiens fatty acid desaturase 3 (FADS3), mRNA	cDNA FLJ61272, highly similar to Homo sapiens fatty acid desaturase 3 (FADS3), mRNA				B7Z345	54	393
171	lcl|150324	966	0		cDNA FLJ35722 fis, clone TESTI2001697, highly similar to Homo sapiens spermatogenesis associated 16 (SPATA16), mRNA	cDNA FLJ35722 fis, clone TESTI2001697, highly similar to Homo sapiens spermatogenesis associated 16 (SPATA16), mRNA				B3KS78	8	958
172	lcl|37420	679	0	RGMB	RGM domain family member B	RGM domain family member B RGMB	identical protein binding |	cell adhesion | signal transduction | axon guidance | BMP signaling pathway | positive regulation of transcription, DNA-templated |	endoplasmic reticulum-Golgi intermediate compartment | membrane raft | anchored component of plasma membrane |	Q6NW40	72	607
173	lcl|99712	799	0	ZNF202	Zinc finger protein 202	Zinc finger protein 202 ZNF202	sequence-specific DNA binding RNA polymerase II transcription factor activity | DNA binding | sequence-specific DNA binding transcription factor activity | metal ion binding |	negative regulation of transcription from RNA polymerase II promoter | transcription from RNA polymerase II promoter | lipid metabolic process |	nucleus |	O95125 530398350 530398352 578822363 578822365 530398354 578822367 530398356 530398358 56699475	6	793
174	lcl|38366	1165	0	CCDC138	PREDICTED: coiled-coil domain-containing protein 138 isoform X1	PREDICTED: coiled-coil domain-containing protein 138 isoform X1 CCDC138				530368538	6	1159
175	lcl|1543	517	0	HLA-C	MHC class I antigen	MHC class I antigen HLA-C	receptor binding | peptide antigen binding | peptide antigen binding | peptide antigen binding | TAP binding |	positive regulation of T cell mediated cytotoxicity | antigen processing and presentation of peptide antigen via MHC class I | antigen processing and presentation of exogenous peptide antigen via MHC class I, TAP-dependent | antigen processing and presentation of exogenous peptide antigen via MHC class I, TAP-independent | antigen processing and presentation of endogenous peptide antigen via MHC …	Golgi membrane | extracellular region | plasma membrane | integral component of plasma membrane | cell surface | cell surface | ER to Golgi transport vesicle membrane | phagocytic vesicle membrane | early endosome membrane | MHC class I protein complex | MHC class I protein complex | extracellular vesicular exosome | integral component of lumenal side of endoplasmic reticulum membrane |	A7UM82	0	517
176	lcl|126745	252	0		60S ribosomal protein L18	60S ribosomal protein L18				B4DDY5	0	252
177	lcl|66315	19	0	ND6	NADH-ubiquinone oxidoreductase chain 6	NADH-ubiquinone oxidoreductase chain 6 ND6				K7WBE4	4	15
178	lcl|452	1079	0	FRMD4B	FERM domain-containing protein 4B	FERM domain-containing protein 4B FRMD4B		establishment of epithelial cell polarity |	ruffle | extracellular space | cytoplasm | cytoskeleton |	E9PGA7 530373641	2	1077
179	lcl|83433	675	0	NOXO1	NADPH oxidase organizer 1 isoform d	NADPH oxidase organizer 1 isoform d NOXO1	protein binding | phospholipid binding | superoxide-generating NADPH oxidase activator activity | enzyme binding | phosphatidylinositol binding | identical protein binding |	superoxide metabolic process | regulation of hydrogen peroxide metabolic process | extracellular matrix disassembly | positive regulation of catalytic activity | regulation of respiratory burst |	NADPH oxidase complex |	391353386	32	643
180	lcl|92543	64	0	ZNF561	Zinc finger protein 561	Zinc finger protein 561 ZNF561	DNA binding | metal ion binding |	transcription, DNA-templated | regulation of transcription, DNA-templated |	nucleus |	F8W7U5	0	64
181	lcl|132854	71	0	NPIPA7	KIAA0220-like protein	KIAA0220-like protein NPIPA7				Q9NRE7	0	71
182	lcl|93449	443	0	AP2A2	AP-2 complex subunit alpha-2 (Fragment)	AP-2 complex subunit alpha-2 (Fragment) AP2A2	molecular_function | protein binding | lipid binding | protein transporter activity |	intracellular protein transport | endocytosis | epidermal growth factor receptor signaling pathway | synaptic transmission | axon guidance | viral process | antigen processing and presentation of exogenous peptide antigen via MHC class II | negative regulation of epidermal growth factor receptor signaling pathway | neurotrophin TRK receptor signaling pathway | regulation of defense response to vi…	cytosol | plasma membrane | coated pit | clathrin adaptor complex | endocytic vesicle membrane | clathrin-coated endocytic vesicle membrane |	H0YEG0	0	443
183	lcl|122256	186	0	HLA-C	MHC class I antigen (Fragment)	MHC class I antigen (Fragment) HLA-C	receptor binding | peptide antigen binding | peptide antigen binding | peptide antigen binding | TAP binding |	positive regulation of T cell mediated cytotoxicity | antigen processing and presentation of peptide antigen via MHC class I | antigen processing and presentation of exogenous peptide antigen via MHC class I, TAP-dependent | antigen processing and presentation of exogenous peptide antigen via MHC class I, TAP-independent | antigen processing and presentation of endogenous peptide antigen via MHC …	Golgi membrane | extracellular region | plasma membrane | integral component of plasma membrane | cell surface | cell surface | ER to Golgi transport vesicle membrane | phagocytic vesicle membrane | early endosome membrane | MHC class I protein complex | MHC class I protein complex | extracellular vesicular exosome | integral component of lumenal side of endoplasmic reticulum membrane |	F6IQB0	4	182
184	lcl|53789	92	0	HLA-B	MHC class I antigen (Fragment)	MHC class I antigen (Fragment) HLA-B	receptor binding | receptor binding | peptide antigen binding | peptide antigen binding | peptide antigen binding | TAP binding | TAP binding |	positive regulation of T cell mediated cytotoxicity | positive regulation of T cell mediated cytotoxicity | antigen processing and presentation of peptide antigen via MHC class I | antigen processing and presentation of peptide antigen via MHC class I | antigen processing and presentation of exogenous peptide antigen via MHC class I, TAP-dependent | antigen processing and presentation of exogenou…	Golgi membrane | plasma membrane | integral component of plasma membrane | cell surface | cell surface | ER to Golgi transport vesicle membrane | membrane | integral component of membrane | phagocytic vesicle membrane | early endosome membrane | MHC class I protein complex | MHC class I protein complex | extracellular vesicular exosome | integral component of lumenal side of endoplasmic reticulum…	V6BQR4	0	92
185	lcl|80811	10	0	TMBIM1	Protein lifeguard 3 (Fragment)	Protein lifeguard 3 (Fragment) TMBIM1			lysosomal membrane | endosome membrane | integral component of membrane | extracellular vesicular exosome |	C9JAP5	4	6
186	lcl|143346	583	0	WDR41	WD repeat-containing protein 41 (Fragment)	WD repeat-containing protein 41 (Fragment) WDR41			lysosomal membrane |	D6RE66	8	575
187	lcl|126117	249	0		cDNA FLJ37787 fis, clone BRHIP2028583, weakly similar to TYPE III INTERMEDIATE FILAMENT	cDNA FLJ37787 fis, clone BRHIP2028583, weakly similar to TYPE III INTERMEDIATE FILAMENT				B3KT74	10	239
188	lcl|93130	263	0	DEFB130	Beta-defensin 130	Beta-defensin 130 DEFB130		defense response to bacterium |	extracellular region |	Q30KQ2 83699414 305410850	0	263
189	lcl|52867	386	0		cDNA FLJ57150, highly similar to Mitogen-activated protein kinase kinase kinase 7-interacting protein 1	cDNA FLJ57150, highly similar to Mitogen-activated protein kinase kinase kinase 7-interacting protein 1				B7Z3S5	12	374
190	lcl|108387	147	0	HLA-C	MHC class I antigen (Fragment)	MHC class I antigen (Fragment) HLA-C	receptor binding | peptide antigen binding | peptide antigen binding | peptide antigen binding | TAP binding |	positive regulation of T cell mediated cytotoxicity | antigen processing and presentation of peptide antigen via MHC class I | antigen processing and presentation of exogenous peptide antigen via MHC class I, TAP-dependent | antigen processing and presentation of exogenous peptide antigen via MHC class I, TAP-independent | antigen processing and presentation of endogenous peptide antigen via MHC …	Golgi membrane | extracellular region | plasma membrane | integral component of plasma membrane | cell surface | cell surface | ER to Golgi transport vesicle membrane | phagocytic vesicle membrane | early endosome membrane | MHC class I protein complex | MHC class I protein complex | extracellular vesicular exosome | integral component of lumenal side of endoplasmic reticulum membrane |	C1KBJ9	0	147
191	lcl|133082	13	0	ND1	NADH-ubiquinone oxidoreductase chain 1	NADH-ubiquinone oxidoreductase chain 1 ND1				A0S2L2	0	13
192	lcl|16007	168	0	RPS3A	40S ribosomal protein S3a (Fragment)	40S ribosomal protein S3a (Fragment) RPS3A	RNA binding | structural constituent of ribosome | protein binding | poly(A) RNA binding |	nuclear-transcribed mRNA catabolic process, nonsense-mediated decay | cytoplasmic translation | translation | translation | translation | translation | translational initiation | translational elongation | translational termination | SRP-dependent cotranslational protein targeting to membrane | gene expression | viral process | RNA metabolic process | mRNA metabolic process | viral life cycle | v…	nucleus | nucleus | nucleolus | cytoplasm | cytosol | cytosol | cytosolic small ribosomal subunit | ribonucleoprotein complex | extracellular vesicular exosome |	D6RGE0	0	168
193	lcl|71348	49	0	PPY	Pancreatic hormone	Pancreatic hormone PPY	G-protein coupled receptor binding | receptor binding | hormone activity |	digestion | protein secretion |	extracellular region |	K7EKP2	0	49
194	lcl|152492	650	0	UMPS	Orotate phosphoribosyltransferase	Orotate phosphoribosyltransferase UMPS	orotate phosphoribosyltransferase activity | orotate phosphoribosyltransferase activity | orotidine-5'-phosphate decarboxylase activity | orotidine-5'-phosphate decarboxylase activity |	pyrimidine nucleobase metabolic process | 'de novo' pyrimidine nucleobase biosynthetic process | UMP biosynthetic process | female pregnancy | lactation | cellular response to drug | 'de novo' UMP biosynthetic process | small molecule metabolic process | pyrimidine nucleoside biosynthetic process | nucleobase-containing small molecule metabolic process |	nucleus | cytoplasm | cytosol |	E9PFD2	6	644
195	lcl|145667	523	0	UBXN6	UBX domain-containing protein 6 (Fragment)	UBX domain-containing protein 6 (Fragment) UBXN6	molecular_function | protein binding |	biological_process |	nucleus | cytoplasm | microtubule organizing center | extracellular vesicular exosome |	K7EP32	6	517
196	lcl|50587	195	0	MRPL1	39S ribosomal protein L1, mitochondrial (Fragment)	39S ribosomal protein L1, mitochondrial (Fragment) MRPL1	structural constituent of ribosome | poly(A) RNA binding |	translation |	large ribosomal subunit |	H0YAB5	0	195
197	lcl|23945	55	0	ZNF181	Zinc finger protein 181 (Fragment)	Zinc finger protein 181 (Fragment) ZNF181	DNA binding | metal ion binding |	transcription, DNA-templated | regulation of transcription, DNA-templated |	nucleus |	M0R074	0	55
198	lcl|135692	699	0		Paxillin variant (Fragment)	Paxillin variant (Fragment)				Q59GS5	18	681
199	lcl|100509	1172	0	ATXN2L	PREDICTED: ataxin-2-like protein isoform X1	PREDICTED: ataxin-2-like protein isoform X1 ATXN2L	protein binding | poly(A) RNA binding |	regulation of cytoplasmic mRNA processing body assembly | stress granule assembly |	cytoplasmic stress granule | membrane | nuclear speck |	530407501 530407503 530407505	37	1135
200	lcl|102975	77	0	ENC1	Ectoderm-neural cortex protein 1 (Fragment)	Ectoderm-neural cortex protein 1 (Fragment) ENC1	actin binding | protein binding |	multicellular organismal development | nervous system development | proteasomal ubiquitin-independent protein catabolic process | protein ubiquitination | negative regulation of translation |	nucleus | cytoplasm | cytoskeleton | nuclear matrix | Cul3-RING ubiquitin ligase complex |	D6R9D7	0	77
201	lcl|56406	619	0	PGAM1	Phosphoglycerate mutase 1 (Brain)	Phosphoglycerate mutase 1 (Brain) PGAM1	bisphosphoglycerate mutase activity | bisphosphoglycerate 2-phosphatase activity | phosphoglycerate mutase activity | phosphoglycerate mutase activity | phosphoglycerate mutase activity | protein binding | protein kinase binding |	carbohydrate metabolic process | glucose metabolic process | gluconeogenesis | glycolytic process | glycolytic process | regulation of glycolytic process | regulation of pentose-phosphate shunt | small molecule metabolic process | respiratory burst |	cytoplasm | cytosol | cytosol | extracellular vesicular exosome |	Q6P6D7	0	619
202	lcl|96758	1308	0	MCPH1	PREDICTED: microcephalin isoform X1	PREDICTED: microcephalin isoform X1 MCPH1	protein binding | identical protein binding |	mitotic cell cycle |	nucleoplasm | cytoplasm | microtubule organizing center |	530387352	2	1306
203	lcl|109169	1216	0	ADAM23	Disintegrin and metalloproteinase domain-containing protein 23	Disintegrin and metalloproteinase domain-containing protein 23 ADAM23	metalloendopeptidase activity | integrin binding | protein binding | metallopeptidase activity | zinc ion binding |	cell adhesion | central nervous system development |	extracellular region | integral component of plasma membrane |	E7EWD3	68	1148
204	lcl|18978	730	0		cDNA FLJ51133, highly similar to Ribonucleoside-diphosphate reductase large subunit (EC 1.17.4.1)	cDNA FLJ51133, highly similar to Ribonucleoside-diphosphate reductase large subunit (EC 1.17.4.1)				B4DXB0	12	718
205	lcl|25704	658	0	PIK3C3	Phosphatidylinositol 3-kinase catalytic subunit type 3	Phosphatidylinositol 3-kinase catalytic subunit type 3 PIK3C3	protein kinase activity | protein binding | ATP binding | 1-phosphatidylinositol-3-kinase activity |	autophagic vacuole assembly | cytokinesis | toll-like receptor signaling pathway | phospholipid metabolic process | phosphatidylinositol biosynthetic process | endosome organization | insulin receptor signaling pathway | protein processing | toll-like receptor 9 signaling pathway | phosphatidylinositol-3-phosphate biosynthetic process | phosphatidylinositol-3-phosphate biosynthetic process | resp…	late endosome | cytosol | axoneme | phosphatidylinositol 3-kinase complex | midbody |	M0R0G8	8	650
206	lcl|122063	842	0	EMID1	EMI domain-containing protein 1 isoform 1 precursor	EMI domain-containing protein 1 isoform 1 precursor EMID1			proteinaceous extracellular matrix | collagen | endoplasmic reticulum | Golgi apparatus |	50511941	24	818
207	lcl|151900	419	0	TRMT6	PREDICTED: tRNA (adenine(58)-N(1))-methyltransferase non-catalytic subunit TRM6 isoform X1	PREDICTED: tRNA (adenine(58)-N(1))-methyltransferase non-catalytic subunit TRM6 isoform X1 TRMT6	translation initiation factor activity | poly(A) RNA binding |	regulation of translational initiation | tRNA processing |	nucleus |	530425733	4	415
208	lcl|100388	324	0		cDNA FLJ53190, highly similar to Beta-glucuronidase (EC 3.2.1.31)	cDNA FLJ53190, highly similar to Beta-glucuronidase (EC 3.2.1.31)				B4DTH9	0	324
209	lcl|55976	487	0	ATL2	Atlastin-2	Atlastin-2 ATL2	GTPase activity | protein binding | GTP binding | identical protein binding |	GTP catabolic process | ER to Golgi vesicle-mediated transport | endoplasmic reticulum organization | Golgi organization | protein homooligomerization |	endoplasmic reticulum | endoplasmic reticulum membrane | integral component of membrane |	B5MCN0	4	483
210	lcl|75684	117	0	HLA-A	MHC class I antigen (Fragment)	MHC class I antigen (Fragment) HLA-A	receptor binding | receptor binding | protein binding | peptide antigen binding | peptide antigen binding | peptide antigen binding | poly(A) RNA binding | TAP binding |	positive regulation of T cell mediated cytotoxicity | positive regulation of T cell mediated cytotoxicity | antigen processing and presentation of peptide antigen via MHC class I | antigen processing and presentation of exogenous peptide antigen via MHC class I, TAP-dependent | antigen processing and presentation of exogenous peptide antigen via MHC class I, TAP-independent | antigen processing a…	Golgi membrane | plasma membrane | integral component of plasma membrane | cell surface | ER to Golgi transport vesicle membrane | phagocytic vesicle membrane | early endosome membrane | MHC class I protein complex | MHC class I protein complex | extracellular vesicular exosome | integral component of lumenal side of endoplasmic reticulum membrane |	D5FHR8	0	117
211	lcl|64809	35	0	ND5	NADH-ubiquinone oxidoreductase chain 5	NADH-ubiquinone oxidoreductase chain 5 ND5				F2YMB8	12	23
212	lcl|25832	1929	0	ZBTB4	Zinc finger and BTB domain-containing protein 4	Zinc finger and BTB domain-containing protein 4 ZBTB4	protein binding | methyl-CpG binding | methyl-CpNpG binding | protein kinase binding | protein homodimerization activity | sequence-specific DNA binding | metal ion binding |	transcription, DNA-templated | cellular response to DNA damage stimulus | negative regulation of transcription, DNA-templated |	nucleus |	Q9P1Z0 192807286 192807284 578830003 578830005	255	1674
213	lcl|14760	1651	0	BAIAP3	BAI1-associated protein 3	BAI1-associated protein 3 BAIAP3	protein C-terminus binding |	G-protein coupled receptor signaling pathway | neurotransmitter secretion |		O94812 15451914	44	1607
214	lcl|99319	1052	0	SRPR	signal recognition particle receptor subunit alpha isoform 2	signal recognition particle receptor subunit alpha isoform 2 SRPR	GTPase activity | signal recognition particle binding | GTP binding | poly(A) RNA binding |	translation | cotranslational protein targeting to membrane | SRP-dependent cotranslational protein targeting to membrane | activation of signaling protein activity involved in unfolded protein response | gene expression | endoplasmic reticulum unfolded protein response | cellular protein metabolic process |	endoplasmic reticulum | signal recognition particle receptor complex | endoplasmic reticulum membrane | membrane | integral component of membrane | extracellular vesicular exosome |	295424842	18	1034
215	lcl|131543	98	0	HLA-B	MHC class I antigen (Fragment)	MHC class I antigen (Fragment) HLA-B	receptor binding | receptor binding | peptide antigen binding | peptide antigen binding | peptide antigen binding | TAP binding | TAP binding |	positive regulation of T cell mediated cytotoxicity | positive regulation of T cell mediated cytotoxicity | antigen processing and presentation of peptide antigen via MHC class I | antigen processing and presentation of peptide antigen via MHC class I | antigen processing and presentation of exogenous peptide antigen via MHC class I, TAP-dependent | antigen processing and presentation of exogenou…	Golgi membrane | plasma membrane | integral component of plasma membrane | cell surface | cell surface | ER to Golgi transport vesicle membrane | membrane | integral component of membrane | phagocytic vesicle membrane | early endosome membrane | MHC class I protein complex | MHC class I protein complex | extracellular vesicular exosome | integral component of lumenal side of endoplasmic reticulum…	A5PHT8	0	98
216	lcl|49990	283	0		cDNA FLJ14828 fis, clone OVARC1000915, highly similar to Homo sapiens histone deacetylase 5 mRNA	cDNA FLJ14828 fis, clone OVARC1000915, highly similar to Homo sapiens histone deacetylase 5 mRNA				Q96K29	0	283
217	lcl|66318	64	0	PLA2G1B	PLA2G1B protein	PLA2G1B protein PLA2G1B	phospholipase A2 activity | receptor binding | receptor binding | calcium ion binding | bile acid binding | calcium-dependent phospholipase A2 activity |	activation of MAPK activity | innate immune response in mucosa | neutrophil mediated immunity | fatty acid biosynthetic process | phospholipid metabolic process | phosphatidic acid biosynthetic process | actin filament organization | signal transduction | positive regulation of calcium ion transport into cytosol | glucose transport | leukotriene biosynthetic process | antibacterial humoral respon…	extracellular region | extracellular space | cell surface | secretory granule |	Q9BS22	2	62
218	lcl|143315	30	0	HLA-DRB1	MHC class II antigen (Fragment)	MHC class II antigen (Fragment) HLA-DRB1	MHC class II protein complex binding | MHC class II receptor activity | MHC class II receptor activity | peptide antigen binding |	immunoglobulin production involved in immunoglobulin mediated immune response | immunoglobulin production involved in immunoglobulin mediated immune response | inflammatory response to antigenic stimulus | humoral immune response mediated by circulating immunoglobulin | humoral immune response mediated by circulating immunoglobulin | immune response | immune response | detection of bacterium | cy…	Golgi membrane | lysosomal membrane | lysosomal membrane | plasma membrane | integral component of plasma membrane | external side of plasma membrane | ER to Golgi transport vesicle membrane | membrane | transport vesicle membrane | endocytic vesicle membrane | clathrin-coated endocytic vesicle membrane | late endosome membrane | trans-Golgi network membrane | MHC class II protein complex | extra…	Q7YQ32	0	30
219	lcl|67819	4	0	CYTB	Cytochrome b	Cytochrome b CYTB				R9Y258	4	0
220	lcl|55960	137	0	STIL	SCL-interrupting locus protein (Fragment)	SCL-interrupting locus protein (Fragment) STIL	protein binding |	embryonic axis specification | in utero embryonic development | neural tube closure | heart looping | smoothened signaling pathway | determination of left/right symmetry | cell proliferation | neural tube development | forebrain development | notochord development | floor plate development | multicellular organism growth | negative regulation of apoptotic process |	centrosome | cytosol |	Q5T0C8	0	137
221	lcl|53360	481	0	SLC25A3	phosphate carrier protein, mitochondrial isoform b precursor	phosphate carrier protein, mitochondrial isoform b precursor SLC25A3	symporter activity | phosphate ion carrier activity | protein complex binding |	generation of precursor metabolites and energy | transport | phosphate ion transmembrane transport |	mitochondrial inner membrane | integral component of plasma membrane | extracellular vesicular exosome |	47132595 4505775	0	481
222	lcl|13220	429	0	C9orf135	Uncharacterized protein C9orf135	Uncharacterized protein C9orf135 C9orf135			integral component of membrane |	Q5VTT2 58219541	10	419
223	lcl|5565	326	0	LTB	Lymphotoxin-beta	Lymphotoxin-beta LTB	receptor binding | cytokine activity | tumor necrosis factor receptor binding |	immune response | signal transduction | cell-cell signaling | gene expression | skin development | positive regulation of interleukin-12 biosynthetic process | lymph node development |	cellular_component | extracellular space | integral component of membrane |	Q06643 Q5STB2 4505035	22	304
224	lcl|151258	195	0	DUSP6	Dual specificity phosphatase 6 (Fragment)	Dual specificity phosphatase 6 (Fragment) DUSP6	protein tyrosine phosphatase activity | MAP kinase tyrosine/serine/threonine phosphatase activity |	inactivation of MAPK activity | toll-like receptor signaling pathway | MyD88-dependent toll-like receptor signaling pathway | MyD88-independent toll-like receptor signaling pathway | dorsal/ventral pattern formation | response to organic cyclic compound | cell differentiation | toll-like receptor 2 signaling pathway | toll-like receptor 3 signaling pathway | toll-like receptor 4 signaling pathway…	nucleoplasm | cytoplasm | cytosol |	Q689E8	4	191
225	lcl|112774	568	0		cDNA FLJ40166 fis, clone TESTI2016197	cDNA FLJ40166 fis, clone TESTI2016197				Q8N803	4	564
226	lcl|4640	296	0	HLA-B	MHC class I antigen (Fragment)	MHC class I antigen (Fragment) HLA-B	receptor binding | receptor binding | peptide antigen binding | peptide antigen binding | peptide antigen binding | TAP binding | TAP binding |	positive regulation of T cell mediated cytotoxicity | positive regulation of T cell mediated cytotoxicity | antigen processing and presentation of peptide antigen via MHC class I | antigen processing and presentation of peptide antigen via MHC class I | antigen processing and presentation of exogenous peptide antigen via MHC class I, TAP-dependent | antigen processing and presentation of exogenou…	Golgi membrane | plasma membrane | integral component of plasma membrane | cell surface | cell surface | ER to Golgi transport vesicle membrane | membrane | integral component of membrane | phagocytic vesicle membrane | early endosome membrane | MHC class I protein complex | MHC class I protein complex | extracellular vesicular exosome | integral component of lumenal side of endoplasmic reticulum…	F8R187	0	296
227	lcl|77846	734	0	TH	Tyrosine 3-monooxygenase	Tyrosine 3-monooxygenase TH	tyrosine 3-monooxygenase activity | tyrosine 3-monooxygenase activity | protein binding | ferrous iron binding | ferric iron binding | amino acid binding | oxygen binding | protein domain specific binding | tetrahydrobiopterin binding | dopamine binding |	response to hypoxia | synaptic transmission, dopaminergic | response to amphetamine | heart morphogenesis | dopamine biosynthetic process from tyrosine | fatty acid metabolic process | sphingolipid metabolic process | heart development | visual perception | sensory perception of sound | learning | memory | mating behavior | locomotory behavior | regulation of heart contraction | response to water…	nucleus | cytoplasm | mitochondrion | smooth endoplasmic reticulum | cytosol | synaptic vesicle | cytoplasmic side of plasma membrane | dendrite | cytoplasmic vesicle | melanosome membrane | neuron projection | terminal bouton | perikaryon |	P07101 88900501	38	696
228	lcl|68912	1928	0	ADAMTS14	A disintegrin and metalloproteinase with thrombospondin motifs 14 isoform 1 preproprotein	A disintegrin and metalloproteinase with thrombospondin motifs 14 isoform 1 preproprotein ADAMTS14	metalloendopeptidase activity | zinc ion binding |	extracellular matrix organization | collagen fibril organization | collagen catabolic process |	extracellular region | proteinaceous extracellular matrix |	110611167	8	1920
229	lcl|31011	147	0	RAD51D	DNA repair protein RAD51 homolog 4 (Fragment)	DNA repair protein RAD51 homolog 4 (Fragment) RAD51D	four-way junction DNA binding | DNA binding | single-stranded DNA binding | protein binding | ATP binding | DNA-dependent ATPase activity | gamma-tubulin binding |	telomere maintenance | double-strand break repair via homologous recombination | ATP catabolic process | DNA repair | reciprocal meiotic recombination | strand invasion |	chromosome, telomeric region | nucleus | replication fork | cytoplasm | centrosome | Rad51B-Rad51C-Rad51D-XRCC2 complex |	K7ESI1	8	139
230	lcl|77143	176	0	PTPN6	Tyrosine-protein phosphatase non-receptor type 6 (Fragment)	Tyrosine-protein phosphatase non-receptor type 6 (Fragment) PTPN6	phosphotyrosine binding | protein tyrosine phosphatase activity | transmembrane receptor protein tyrosine phosphatase activity | protein binding | SH3 domain binding | protein kinase binding | SH2 domain binding |	negative regulation of humoral immune response mediated by circulating immunoglobulin | protein dephosphorylation | apoptotic process | G-protein coupled receptor signaling pathway | blood coagulation | cell proliferation | positive regulation of cell proliferation | negative regulation of cell proliferation | positive regulation of phosphatidylinositol 3-kinase signaling | peptidyl-tyrosine phos…	nucleus | cytoplasm | cytosol | membrane | alpha-beta T cell receptor complex | extracellular vesicular exosome |	F5H5H9	4	172
231	lcl|142249	80	0	SLC24A5	Sodium/potassium/calcium exchanger 5	Sodium/potassium/calcium exchanger 5 SLC24A5	calcium, potassium:sodium antiporter activity | symporter activity |	ion transport | ion transmembrane transport | sodium ion transmembrane transport | response to stimulus | transmembrane transport |	Golgi apparatus | trans-Golgi network | plasma membrane | integral component of membrane | melanosome |	H0YLZ0	6	74
232	lcl|43062	8	0	SDHAF2	Succinate dehydrogenase assembly factor 2, mitochondrial	Succinate dehydrogenase assembly factor 2, mitochondrial SDHAF2	protein binding |	mitochondrial electron transport, succinate to ubiquinone | protein-FAD linkage |	mitochondrion |	F5H4T4	0	8
233	lcl|144122	255	0	IL15RA	PREDICTED: interleukin-15 receptor subunit alpha isoform X5	PREDICTED: interleukin-15 receptor subunit alpha isoform X5 IL15RA	signal transducer activity | cytokine receptor activity | protein binding |	signal transduction | JAK-STAT cascade | cell proliferation | negative regulation of neuron projection development | cytokine-mediated signaling pathway | response to nutrient levels | positive regulation of natural killer cell differentiation |	Golgi membrane | extracellular space | endoplasmic reticulum membrane | plasma membrane | integral component of membrane | cytoplasmic vesicle membrane | nuclear membrane |	578818404	4	251
234	lcl|7079	232	0	ARV1	Protein ARV1	Protein ARV1 ARV1		sphingolipid metabolic process | bile acid metabolic process | cholesterol transport | regulation of cholesterol metabolic process |	integral component of membrane |	Q9H2C2 12232479	0	232
235	lcl|72823	1059	0	TRIM45	tripartite motif-containing protein 45 isoform 2	tripartite motif-containing protein 45 isoform 2 TRIM45	zinc ion binding |	bone development |	nucleus | cytoplasm |	224548923	20	1039
236	lcl|116089	2981	0	FRYL	PREDICTED: protein furry homolog-like isoform X5	PREDICTED: protein furry homolog-like isoform X5 FRYL		transcription, DNA-templated | regulation of transcription, DNA-templated |		530376629	64	2917
237	lcl|85830	548	0	SMPD1	Sphingomyelin phosphodiesterase	Sphingomyelin phosphodiesterase SMPD1	sphingomyelin phosphodiesterase activity | protein binding | hydrolase activity, acting on glycosyl bonds |	sphingolipid metabolic process | sphingomyelin metabolic process | sphingomyelin catabolic process | glycosphingolipid metabolic process | signal transduction | nervous system development | cell death | termination of signal transduction | positive regulation of protein dephosphorylation | response to cocaine | response to drug | positive regulation of apoptotic process | negative regulation of M…	extracellular space | lamellar body | lysosomal lumen |	G3V1E1	8	540
238	lcl|16681	247	0	CCDC14	Coiled-coil domain-containing protein 14	Coiled-coil domain-containing protein 14 CCDC14		substantia nigra development |	centrosome |	C9J6B5	0	247
239	lcl|31087	126	0	RHOT1	Mitochondrial Rho GTPase 1 (Fragment)	Mitochondrial Rho GTPase 1 (Fragment) RHOT1	molecular_function | GTPase activity | calcium ion binding | protein binding | GTP binding |	small GTPase mediated signal transduction | cellular homeostasis | mitochondrion transport along microtubule | regulation of small GTPase mediated signal transduction | mitochondrial outer membrane permeabilization |	cytosol | plasma membrane | integral component of mitochondrial outer membrane |	J3QLG2	0	126
240	lcl|57179	812	0	MAP3K5	Mitogen-activated protein kinase kinase kinase 5	Mitogen-activated protein kinase kinase kinase 5 MAP3K5	magnesium ion binding | protein kinase activity | MAP kinase kinase kinase activity | protein binding | ATP binding | cysteine-type endopeptidase activator activity involved in apoptotic process | protein kinase binding | protein phosphatase binding | protein homodimerization activity |	MAPK cascade | activation of MAPKK activity | response to ischemia | activation of cysteine-type endopeptidase activity involved in apoptotic process | JNK cascade | activation of JUN kinase activity | intrinsic apoptotic signaling pathway in response to oxidative stress | viral process | positive regulation of apoptotic process | positive regulation of cysteine-type endopeptidase activity involv…	endoplasmic reticulum | cytosol |	A6NIA0	24	788
241	lcl|91008	13618	0	SYNE1	Nesprin-1	Nesprin-1 SYNE1	actin binding | protein binding | lamin binding | protein homodimerization activity | poly(A) RNA binding | actin filament binding |	nucleus organization | Golgi organization | cell death | muscle cell differentiation | cytoskeletal anchoring at nuclear membrane | nuclear matrix anchoring at nuclear membrane |	nucleus | nuclear envelope | nuclear outer membrane | cytoplasm | Golgi apparatus | cytoskeleton | integral component of membrane | sarcomere | SUN-KASH complex | postsynaptic membrane |	E9PEL9	96	13522
242	lcl|106135	1566	0	ANO2	anoctamin-2 isoform 2	anoctamin-2 isoform 2 ANO2	intracellular calcium activated chloride channel activity |	ion transmembrane transport | transmembrane transport | chloride transmembrane transport |	plasma membrane | plasma membrane | chloride channel complex |	515870521	40	1526
243	lcl|144173	728	0	KCNC4	Potassium voltage-gated channel subfamily C member 4	Potassium voltage-gated channel subfamily C member 4 KCNC4	voltage-gated potassium channel activity | delayed rectifier potassium channel activity | potassium channel activity |	potassium ion transport | synaptic transmission | regulation of neurotransmitter secretion | protein homooligomerization |	plasma membrane | voltage-gated potassium channel complex | neuromuscular junction | axon terminus |	Q03721 24497462	12	716
244	lcl|93815	1070	0	ZNF675	PREDICTED: zinc finger protein 675 isoform X4	PREDICTED: zinc finger protein 675 isoform X4 ZNF675	DNA binding | protein binding | zinc ion binding | ubiquitin protein ligase binding |	negative regulation of transcription from RNA polymerase II promoter | transcription, DNA-templated | I-kappaB kinase/NF-kappaB signaling | negative regulation of tumor necrosis factor-mediated signaling pathway | cytokine-mediated signaling pathway | negative regulation of NF-kappaB transcription factor activity | negative regulation of JUN kinase activity | bone resorption | negative regulation…	nucleus | perinuclear region of cytoplasm |	530414624 578833063	0	1070
245	lcl|101490	123	0		Uncharacterized protein (Fragment)	Uncharacterized protein (Fragment)				H7C1K1	4	119
246	lcl|43380	61	0		Putative uncharacterized protein	Putative uncharacterized protein				Q6YL35	0	61
247	lcl|78514	26	0	FRY	Alternative protein FRY	Alternative protein FRY FRY			spindle pole | cytoplasm | microtubule organizing center |	L8EB55	0	26
248	lcl|121845	99	0	LINC00999	Protein LINC00999	Protein LINC00999 LINC00999				R4GN31	4	95
249	lcl|28792	227	0	hCG_39342	HCG39342, isoform CRA_a	HCG39342, isoform CRA_a hCG_39342				D3DVZ1	0	227
250	lcl|26722	270	0	RIT1	GTP-binding protein Rit1 (Fragment)	GTP-binding protein Rit1 (Fragment) RIT1	protein binding | calmodulin binding | GTP binding |	GTP catabolic process | signal transduction | small GTPase mediated signal transduction | Ras protein signal transduction | neurotrophin TRK receptor signaling pathway |	plasma membrane |	V9GYC3	8	262
251	lcl|139508	266	0		cDNA FLJ59867, highly similar to Homo sapiens InaD-like (INADL), transcript variant 4, mRNA	cDNA FLJ59867, highly similar to Homo sapiens InaD-like (INADL), transcript variant 4, mRNA				B4DFP2	0	266
252	lcl|87940	329	0	DUSP3	Dual specificity protein phosphatase 3	Dual specificity protein phosphatase 3 DUSP3	protein tyrosine phosphatase activity | protein tyrosine/serine/threonine phosphatase activity | protein tyrosine/serine/threonine phosphatase activity | MAP kinase phosphatase activity |	inactivation of MAPK activity | in utero embryonic development | toll-like receptor signaling pathway | MyD88-dependent toll-like receptor signaling pathway | MyD88-independent toll-like receptor signaling pathway | toll-like receptor 2 signaling pathway | toll-like receptor 3 signaling pathway | toll-like receptor 4 signaling pathway | toll-like receptor 5 signaling pathway | toll-like receptor …	immunological synapse | nucleus | nucleoplasm | cytosol |	P51452 4758208	4	325
253	lcl|107308	18	0	CRHR2	Corticotropin-releasing factor receptor 2 (Fragment)	Corticotropin-releasing factor receptor 2 (Fragment) CRHR2	hormone activity | protein binding | corticotrophin-releasing factor receptor activity |	adenylate cyclase-modulating G-protein coupled receptor signaling pathway | negative regulation of angiogenesis | positive regulation of cAMP-mediated signaling | negative regulation of cAMP-mediated signaling |	endoplasmic reticulum | Golgi apparatus | plasma membrane | integral component of plasma membrane | cell surface |	C9JZM9	0	18
254	lcl|41383	91	0	ARHGAP28	Rho GTPase-activating protein 28	Rho GTPase-activating protein 28 ARHGAP28	GTPase activator activity |	small GTPase mediated signal transduction | regulation of small GTPase mediated signal transduction |	cytosol |	J3QLR3	0	91
255	lcl|5918	236	0	KCNN1	Small conductance calcium-activated potassium channel protein 1 (Fragment)	Small conductance calcium-activated potassium channel protein 1 (Fragment) KCNN1	calmodulin binding | calcium-activated potassium channel activity | small conductance calcium-activated potassium channel activity | protein heterodimerization activity |	potassium ion transport | synaptic transmission | potassium ion transmembrane transport |	cytoplasm | plasma membrane | plasma membrane | voltage-gated potassium channel complex | neuronal cell body |	V9GYV2	8	228
256	lcl|155245	362	0	FSIP2	Fibrous sheath-interacting protein 2 (Fragment)	Fibrous sheath-interacting protein 2 (Fragment) FSIP2				H0Y515	0	362
257	lcl|72747	3132	0	FHAD1	Forkhead-associated domain-containing protein 1	Forkhead-associated domain-containing protein 1 FHAD1				B1AJZ9 190341068	20	3112
258	lcl|156377	2817	0	ECM29	Proteasome-associated protein ECM29 homolog	Proteasome-associated protein ECM29 homolog ECM29				Q5VYK3 530390829	65	2752
259	lcl|123733	779	0	AIFM1	apoptosis-inducing factor 1, mitochondrial isoform 3	apoptosis-inducing factor 1, mitochondrial isoform 3 AIFM1	DNA binding | protein binding | electron carrier activity | NAD(P)H oxidase activity | oxidoreductase activity, acting on NAD(P)H | flavin adenine dinucleotide binding |	DNA catabolic process | apoptotic DNA fragmentation | apoptotic process | activation of cysteine-type endopeptidase activity involved in apoptotic process | neuron differentiation | chromosome condensation | mitochondrial respiratory chain complex I assembly | positive regulation of apoptotic process | cell redox homeostasis | neuron apoptotic process | intrinsic apoptotic signaling pathway in re…	nucleus | nucleus | mitochondrion | mitochondrial inner membrane | mitochondrial intermembrane space | mitochondrial intermembrane space | cytosol | perinuclear region of cytoplasm |	22202631	31	748
260	lcl|110459	904	0	RFX5	DNA-binding protein RFX5 (Fragment)	DNA-binding protein RFX5 (Fragment) RFX5	DNA binding | sequence-specific DNA binding transcription factor activity | protein binding |	negative regulation of transcription from RNA polymerase II promoter | transcription, DNA-templated |	nucleus |	H0Y4B4	2	902
261	lcl|127695	405	0	ANXA2	Annexin (Fragment)	Annexin (Fragment) ANXA2	calcium ion binding | protein binding | calcium-dependent phospholipid binding | phosphatidylinositol-4,5-bisphosphate binding | cytoskeletal protein binding | Rab GTPase binding | phospholipase A2 inhibitor activity | S100 protein binding | poly(A) RNA binding |	angiogenesis | membrane raft assembly | positive regulation of protein phosphorylation | membrane budding | body fluid secretion | collagen fibril organization | positive regulation of vesicle fusion | osteoclast development | fibrinolysis | negative regulation of catalytic activity | positive regulation of fibroblast proliferation | positive regulation of binding | protein heterotetramerization …	ruffle | basement membrane | extracellular space | nucleus | early endosome | lipid particle | cell cortex | cell surface | extrinsic component of plasma membrane | midbody | extracellular matrix | myelin sheath adaxonal region | sarcolemma | melanosome | Schmidt-Lanterman incisure | protein complex | macropinosome | membrane raft | perinuclear region of cytoplasm | extracellular vesicular exosom…	H0YL33	4	401
262	lcl|84449	257	0	ZNF610	Zinc finger protein 610 (Fragment)	Zinc finger protein 610 (Fragment) ZNF610	DNA binding | metal ion binding |	transcription, DNA-templated | regulation of transcription, DNA-templated |	nucleus |	M0QYM6	0	257
263	lcl|28469	608	0	VPS72	vacuolar protein sorting-associated protein 72 homolog isoform 1	vacuolar protein sorting-associated protein 72 homolog isoform 1 VPS72	DNA binding | protein binding |	negative regulation of transcription from RNA polymerase II promoter | chromatin organization | transcription, DNA-templated | chromatin modification | somatic stem cell maintenance |	nucleus | nucleoplasm | protein complex |	402793870	8	600
264	lcl|85804	1056	0	CCDC78	PREDICTED: coiled-coil domain-containing protein 78 isoform X8	PREDICTED: coiled-coil domain-containing protein 78 isoform X8 CCDC78		skeletal muscle contraction | cell projection organization | de novo centriole assembly |	centriole | sarcoplasmic reticulum | sarcolemma | perinuclear region of cytoplasm | deuterosome |	578827959	58	998
265	lcl|71613	1157	0	ZC3H14	PREDICTED: zinc finger CCCH domain-containing protein 14 isoform X1	PREDICTED: zinc finger CCCH domain-containing protein 14 isoform X1 ZC3H14	protein binding | poly(A) RNA binding | metal ion binding |		nucleus | cytoplasm | cytoplasm | nuclear speck |	530404626	8	1149
266	lcl|115001	246	0	AKR1C2	aldo-keto reductase family 1 member C2 isoform 2	aldo-keto reductase family 1 member C2 isoform 2 AKR1C2	alditol:NADP+ 1-oxidoreductase activity | prostaglandin F receptor activity | oxidoreductase activity, acting on NAD(P)H, quinone or similar compound as acceptor | phenanthrene 9,10-monooxygenase activity | carboxylic acid binding | bile acid binding | ketosteroid monooxygenase activity | trans-1,2-dihydrobenzene-1,2-diol dehydrogenase activity |	prostaglandin metabolic process | G-protein coupled receptor signaling pathway | digestion | steroid metabolic process | positive regulation of cell proliferation | epithelial cell differentiation | response to prostaglandin | progesterone metabolic process | daunorubicin metabolic process | doxorubicin metabolic process | positive regulation of protein kinase B signaling | oxidation-reduction pr…	cytoplasm |	207028673	0	246
267	lcl|119120	47	0	C16orf3	uncharacterized protein C16orf3	uncharacterized protein C16orf3 C16orf3	molecular_function |	biological_process |	cellular_component |	89886490	4	43
268	lcl|108568	15	0	ND5	NADH-ubiquinone oxidoreductase chain 5	NADH-ubiquinone oxidoreductase chain 5 ND5				E5DYH5	12	3
269	lcl|63552	616	0	SIL1	Nucleotide exchange factor SIL1	Nucleotide exchange factor SIL1 SIL1	unfolded protein binding |	protein folding | intracellular protein transport |	endoplasmic reticulum | endoplasmic reticulum lumen |	D6REA1	12	604
270	lcl|68119	485	0	RNF165	PREDICTED: RING finger protein 165 isoform X1	PREDICTED: RING finger protein 165 isoform X1 RNF165	zinc ion binding |			578832536	8	477
271	lcl|146120	213	0	OR11A1	Olfactory receptor 11A1	Olfactory receptor 11A1 OR11A1	G-protein coupled receptor activity | olfactory receptor activity |		plasma membrane | integral component of membrane |	Q9GZK7 530381772 530381774 530427751 530427753 530427949 530427951 530428281 530428283 530428607 530428609 530428909 530428911 530429196 530429198 7363441	0	213
272	lcl|149425	1285	0	MFN2	Mitofusin-2	Mitofusin-2 MFN2	GTPase activity | protein binding | GTP binding | ubiquitin protein ligase binding |	blastocyst formation | protein targeting to mitochondrion | mitochondrial membrane organization | cell cycle arrest | blood coagulation | mitochondrial fusion | mitochondrial fusion | cell death | negative regulation of Ras protein signal transduction | camera-type eye morphogenesis | negative regulation of smooth muscle cell proliferation | mitochondrion localization |	mitochondrion | mitochondrial outer membrane | cytosol | microtubule cytoskeleton | integral component of membrane | intrinsic component of mitochondrial outer membrane |	O95140 530360735 530360739 530360743 530360745 189083768 7662004	12	1273
273	lcl|42484	181	0	SLC27A3	Long-chain fatty acid transport protein 3 (Fragment)	Long-chain fatty acid transport protein 3 (Fragment) SLC27A3	nucleotide binding | fatty-acyl-CoA synthase activity | ligase activity |	fatty acid metabolic process |	integral component of membrane | mitochondrial membrane |	H0YDM5	0	181
274	lcl|56782	729	0	SNPH	PREDICTED: syntaphilin isoform X1	PREDICTED: syntaphilin isoform X1 SNPH	syntaxin-1 binding |	neurotransmitter secretion | brain development | synaptic vesicle docking involved in exocytosis | neuron differentiation |	cytoplasmic microtubule | integral component of membrane | cell junction | mitochondrial membrane | presynaptic membrane | neuron projection | neuronal cell body |	530426075	17	712
275	lcl|132712	33	0	TSSK3	Testis-specific serine/threonine-protein kinase 3 (Fragment)	Testis-specific serine/threonine-protein kinase 3 (Fragment) TSSK3	magnesium ion binding | protein serine/threonine kinase activity | ATP binding |	protein phosphorylation | multicellular organismal development | spermatogenesis | cell differentiation |		I3L1X4	0	33
276	lcl|5789	7	0	KRAS	K-ras (Fragment)	K-ras (Fragment) KRAS	protein binding | GTP binding | GMP binding | GDP binding | LRR domain binding | protein complex binding |	MAPK cascade | activation of MAPKK activity | positive regulation of protein phosphorylation | GTP catabolic process | epidermal growth factor receptor signaling pathway | small GTPase mediated signal transduction | Ras protein signal transduction | axon guidance | blood coagulation | positive regulation of cell proliferation | insulin receptor signaling pathway | visual learning | fibroblast gro…	mitochondrion | plasma membrane | membrane raft |	A5HC04	0	7
277	lcl|113825	957	0	ZNF34	zinc finger protein 34 isoform 3	zinc finger protein 34 isoform 3 ZNF34	DNA binding | zinc ion binding |	transcription, DNA-templated | regulation of transcription, DNA-templated |	nucleus |	557948071	18	939
278	lcl|108455	2579	0	SORBS1	PREDICTED: sorbin and SH3 domain-containing protein 1 isoform X40	PREDICTED: sorbin and SH3 domain-containing protein 1 isoform X40 SORBS1	actin binding | SH3/SH2 adaptor activity | SH3/SH2 adaptor activity | insulin receptor binding | protein binding | cytoskeletal protein binding | protein kinase binding |	muscle contraction | cell-matrix adhesion | insulin receptor signaling pathway | positive regulation of signal transduction | positive regulation of signal transduction | glucose transport | cellular response to insulin stimulus | stress fiber assembly | positive regulation of glycogen biosynthetic process | positive regulation of glucose import | positive regulation of lipid biosynthetic process…	stress fiber | nucleus | cytosol | cytosol | insulin receptor complex | cell-cell adherens junction | zonula adherens | cell-substrate adherens junction | focal adhesion | nuclear matrix | membrane raft |	578818764	118	2461
279	lcl|29319	1390	0		TNF receptor-associated protein 1 variant (Fragment)	TNF receptor-associated protein 1 variant (Fragment)				Q53FS6	14	1376
280	lcl|11787	14	0	TMEM14B	Transmembrane protein 14B	Transmembrane protein 14B TMEM14B			integral component of membrane |	F2Z2F8	2	12
281	lcl|27875	36	0	PROM1	Prominin-1 (Fragment)	Prominin-1 (Fragment) PROM1	protein binding | actinin binding | cadherin binding |	retina layer formation | photoreceptor cell maintenance | retina morphogenesis in camera-type eye | camera-type eye photoreceptor cell differentiation | camera-type eye photoreceptor cell differentiation | glomerular visceral epithelial cell differentiation | glomerular parietal epithelial cell differentiation | positive regulation of nephron tubule epithelial cell differentiation |	photoreceptor outer segment | extracellular space | plasma membrane | integral component of plasma membrane | brush border | cell surface | apical plasma membrane | microvillus membrane | stereocilium | photoreceptor outer segment membrane | extracellular vesicular exosome |	H0Y9Q5	0	36
282	lcl|3726	1299	0	SLC12A2	SLC12A2 protein	SLC12A2 protein SLC12A2	protein binding | sodium:potassium:chloride symporter activity | ammonium transmembrane transporter activity |	transport | ion transport | potassium ion transport | sodium ion transport | hyperosmotic response | gamma-aminobutyric acid signaling pathway | ammonium transport | transepithelial chloride transport | multicellular organism growth | positive regulation of cell volume | detection of mechanical stimulus involved in sensory perception of sound | transmembrane transport | branching involved in mamm…	plasma membrane | integral component of plasma membrane | membrane | basolateral plasma membrane | apical plasma membrane | extracellular vesicular exosome |	B7ZM24	131	1168
283	lcl|139763	683	0	RPS18	40S ribosomal protein S18	40S ribosomal protein S18 RPS18	structural constituent of ribosome | protein binding | rRNA binding | poly(A) RNA binding |	nuclear-transcribed mRNA catabolic process, nonsense-mediated decay | translation | translation | translation | translational initiation | translational elongation | translational termination | SRP-dependent cotranslational protein targeting to membrane | gene expression | viral process | RNA metabolic process | mRNA metabolic process | viral life cycle | viral transcription | ribosome biogenesis…	nucleus | cytosol | cytosol | ribosome | small ribosomal subunit | small ribosomal subunit | cytosolic small ribosomal subunit | extracellular vesicular exosome |	P62269 11968182	8	675
284	lcl|122517	383	0	SPATA5L1	Spermatogenesis-associated protein 5-like protein 1 (Fragment)	Spermatogenesis-associated protein 5-like protein 1 (Fragment) SPATA5L1	ATP binding | nucleoside-triphosphatase activity |		cytoplasm |	H0YCA5	4	379
285	lcl|59505	261	0	TFG	Protein TFG	Protein TFG TFG	signal transducer activity | protein binding | identical protein binding |	signal transduction | cell death | positive regulation of I-kappaB kinase/NF-kappaB signaling |	cytoplasm |	Q92734 578806985 578806987 306774087 56090139 21361320	6	255
286	lcl|93427	159	0	SPACA7	Protein SPACA7	Protein SPACA7 SPACA7			acrosomal vesicle | extracellular region |	Q96KW9 304361754	9	150
287	lcl|335	527	0	POLR3D	DNA-directed RNA polymerase III subunit RPC4 (Fragment)	DNA-directed RNA polymerase III subunit RPC4 (Fragment) POLR3D	RNA polymerase III activity | DNA binding | chromatin binding |	transcription from RNA polymerase III promoter | transcription elongation from RNA polymerase III promoter | termination of RNA polymerase III transcription | gene expression | positive regulation of type I interferon production | positive regulation of interferon-beta production | innate immune response | positive regulation of innate immune response | defense response to virus |	nuclear chromatin | nucleoplasm | DNA-directed RNA polymerase III complex | DNA-directed RNA polymerase III complex | cytosol |	E5RHT4	20	507
288	lcl|123064	370	0	TWF2	Twinfilin-2	Twinfilin-2 TWF2	actin monomer binding | protein kinase C binding | ATP binding | phosphatidylinositol-4,5-bisphosphate binding | poly(A) RNA binding |	positive regulation of lamellipodium assembly | positive regulation of neuron projection development | cell projection organization | negative regulation of actin filament polymerization | regulation of microvillus length | regulation of actin cytoskeleton organization | sequestering of actin monomers | positive regulation of axon extension | barbed-end actin filament capping | cellular response …	cytoplasm | cytoskeleton | myofibril | lamellipodium | filopodium | growth cone | stereocilium | perinuclear region of cytoplasm | extracellular vesicular exosome |	D6RG15	12	358
289	lcl|75040	477	0	LOC152586	Glycosyltransferase 54 domain-containing protein	Glycosyltransferase 54 domain-containing protein LOC152586	transferase activity, transferring hexosyl groups |	carbohydrate metabolic process |	extracellular region | membrane |	A6NG13 474451716	0	477
290	lcl|120857	577	0	RPS10P5	Putative 40S ribosomal protein S10-like	Putative 40S ribosomal protein S10-like RPS10P5			ribosome |	Q9NQ39	8	569
291	lcl|31474	218	0	HLA-B	MHC class I antigen (Fragment)	MHC class I antigen (Fragment) HLA-B	receptor binding | receptor binding | peptide antigen binding | peptide antigen binding | peptide antigen binding | TAP binding | TAP binding |	positive regulation of T cell mediated cytotoxicity | positive regulation of T cell mediated cytotoxicity | antigen processing and presentation of peptide antigen via MHC class I | antigen processing and presentation of peptide antigen via MHC class I | antigen processing and presentation of exogenous peptide antigen via MHC class I, TAP-dependent | antigen processing and presentation of exogenou…	Golgi membrane | plasma membrane | integral component of plasma membrane | cell surface | cell surface | ER to Golgi transport vesicle membrane | membrane | integral component of membrane | phagocytic vesicle membrane | early endosome membrane | MHC class I protein complex | MHC class I protein complex | extracellular vesicular exosome | integral component of lumenal side of endoplasmic reticulum…	F0VRW0 F4YTF7	0	218
292	lcl|69951	78	0	CLEC2D	C-type lectin domain family 2 member D	C-type lectin domain family 2 member D CLEC2D	transmembrane signaling receptor activity | carbohydrate binding |	cell surface receptor signaling pathway |	endoplasmic reticulum | integral component of plasma membrane | cell surface | membrane |	F8WF99	0	78
293	lcl|15981	1640	0	AGL	Glycogen debranching enzyme (Fragment)	Glycogen debranching enzyme (Fragment) AGL	glycogen debranching enzyme activity | 4-alpha-glucanotransferase activity | amylo-alpha-1,6-glucosidase activity | protein binding | polysaccharide binding | polyubiquitin binding |	carbohydrate metabolic process | glycogen biosynthetic process | glycogen catabolic process | glycogen catabolic process | glucose metabolic process | response to nutrient | small molecule metabolic process | response to glucocorticoid |	cytoplasm | cytosol | inclusion body | sarcoplasmic reticulum | isoamylase complex |	G1UI17	12	1628
294	lcl|50241	210	0		cDNA FLJ25054 fis, clone CBL04360	cDNA FLJ25054 fis, clone CBL04360				Q96LU8	0	210
295	lcl|128408	77	0	NFATC4	Nuclear factor of-activated T-cells, cytoplasmic 4 (Fragment)	Nuclear factor of-activated T-cells, cytoplasmic 4 (Fragment) NFATC4	sequence-specific DNA binding RNA polymerase II transcription factor activity | DNA binding | transcription coactivator activity | protein binding | transcription factor binding | peroxisome proliferator activated receptor binding |	patterning of blood vessels | transcription from RNA polymerase II promoter | inflammatory response | heart development | intrinsic apoptotic signaling pathway in response to DNA damage | positive regulation of tumor necrosis factor production | cellular response to UV | positive regulation of apoptotic process | cellular respiration | positive regulation of transcription from RNA polymerase II p…	nucleus | transcription factor complex | cytosol |	G3V4U6	0	77
296	lcl|117020	48	0	HLA-B	MHC class I antigen (Fragment)	MHC class I antigen (Fragment) HLA-B	receptor binding | receptor binding | peptide antigen binding | peptide antigen binding | peptide antigen binding | TAP binding | TAP binding |	positive regulation of T cell mediated cytotoxicity | positive regulation of T cell mediated cytotoxicity | antigen processing and presentation of peptide antigen via MHC class I | antigen processing and presentation of peptide antigen via MHC class I | antigen processing and presentation of exogenous peptide antigen via MHC class I, TAP-dependent | antigen processing and presentation of exogenou…	Golgi membrane | plasma membrane | integral component of plasma membrane | cell surface | cell surface | ER to Golgi transport vesicle membrane | membrane | integral component of membrane | phagocytic vesicle membrane | early endosome membrane | MHC class I protein complex | MHC class I protein complex | extracellular vesicular exosome | integral component of lumenal side of endoplasmic reticulum…	R4MS56	0	48
297	lcl|114393	560	0	PRKCD	Protein kinase C delta type (Fragment)	Protein kinase C delta type (Fragment) PRKCD	protein serine/threonine kinase activity | protein kinase C activity | calcium-independent protein kinase C activity | non-membrane spanning protein tyrosine kinase activity | protein binding | ATP binding | protein C-terminus binding | enzyme activator activity | enzyme binding | insulin receptor substrate binding | metal ion binding |	protein phosphorylation | apoptotic process | apoptotic process | cellular component disassembly involved in execution phase of apoptosis | cell cycle | signal transduction | epidermal growth factor receptor signaling pathway | activation of phospholipase C activity | blood coagulation | fibroblast growth factor receptor signaling pathway | gene expression | regulation of receptor activity | immu…	nucleus | nucleoplasm | cytoplasm | mitochondrion | endoplasmic reticulum | cytosol | cytosol | plasma membrane | plasma membrane | cell-cell junction | nuclear matrix | perinuclear region of cytoplasm | extracellular vesicular exosome |	C9K0E3	2	558
298	lcl|17275	159	0		NAT2 (Fragment)	NAT2 (Fragment)				Q1HRY5	0	159
299	lcl|26803	744	0	CXADR	Coxsackievirus and adenovirus receptor	Coxsackievirus and adenovirus receptor CXADR	virus receptor activity | receptor binding | integrin binding | protein binding | beta-catenin binding | PDZ domain binding | identical protein binding | cell adhesion molecule binding | connexin binding |	mitochondrion organization | heterophilic cell-cell adhesion | heart development | blood coagulation | germ cell migration | epithelial structure maintenance | viral process | neutrophil chemotaxis | actin cytoskeleton reorganization | homotypic cell-cell adhesion | cell-cell junction organization | gamma-delta T cell activation | cardiac muscle fiber development | regulation of immune response |…	acrosomal vesicle | extracellular region | extracellular space | plasma membrane | plasma membrane | integral component of plasma membrane | cell-cell junction | adherens junction | tight junction | intercalated disc | intercalated disc | basolateral plasma membrane | apicolateral plasma membrane | filopodium | growth cone | neuromuscular junction | neuron projection | protein complex | cell body…	P78310 4503173	14	730
300	lcl|141536	774	0	RPGRIP1	PREDICTED: X-linked retinitis pigmentosa GTPase regulator-interacting protein 1 isoform X6	PREDICTED: X-linked retinitis pigmentosa GTPase regulator-interacting protein 1 isoform X6 RPGRIP1	protein binding |	visual perception | eye photoreceptor cell development | response to stimulus | retina development in camera-type eye |	axoneme | nonmotile primary cilium |	578825978	20	754
301	lcl|133998	267	0	GPR63	G protein-coupled receptor 63	G protein-coupled receptor 63 GPR63	molecular_function | G-protein coupled receptor activity |	biological_process |	plasma membrane | integral component of membrane | receptor complex |	Q6NWR7	4	263
302	lcl|8859	76	0	SP2	SP2 protein	SP2 protein SP2	DNA binding | histone deacetylase binding | metal ion binding |	in utero embryonic development | transcription, DNA-templated | regulation of transcription from RNA polymerase II promoter | immune response | multicellular organism growth | fibroblast proliferation | embryonic organ development | cardiovascular system development |	nucleus |	Q9BRW5	0	76
303	lcl|100126	747	0		cDNA FLJ12587 fis, clone NT2RM4001217, moderately similar to Mus musculus actin-binding protein (ENC-1) mRNA	cDNA FLJ12587 fis, clone NT2RM4001217, moderately similar to Mus musculus actin-binding protein (ENC-1) mRNA				Q9H9R6	0	747
304	lcl|138693	1560	0	ACTN4	Alpha-actinin-4	Alpha-actinin-4 ACTN4	nucleoside binding | actin binding | integrin binding | calcium ion binding | protein binding | protein homodimerization activity | poly(A) RNA binding | protein N-terminus binding | actin filament binding |	response to hypoxia | platelet degranulation | blood coagulation | protein transport | platelet activation | positive regulation of sodium:hydrogen antiporter activity | regulation of apoptotic process | positive regulation of pinocytosis | actin filament bundle assembly | negative regulation of cellular component movement | positive regulation of cellular component movement | positive regulation…	stress fiber | extracellular region | nucleus | cytoplasm | cell-cell junction | Z disc | ribonucleoprotein complex | cortical cytoskeleton | platelet alpha granule lumen | pseudopodium | neuron projection | protein complex | perinuclear region of cytoplasm | extracellular vesicular exosome |	O43707 12025678	4	1556
305	lcl|64965	129	0	COMMD6	COMM domain-containing protein 6 isoform c	COMM domain-containing protein 6 isoform c COMMD6	protein binding | NF-kappaB binding |	negative regulation of NF-kappaB transcription factor activity |	nucleus | cytoplasm |	565671776 565671778 565671780	0	129
306	lcl|68586	438	0	DIS3L2	DIS3-like exonuclease 2 (Fragment)	DIS3-like exonuclease 2 (Fragment) DIS3L2	3'-5'-exoribonuclease activity | RNA binding | ribonuclease activity | protein binding |	nuclear-transcribed mRNA catabolic process, exonucleolytic | mitosis | negative regulation of cell proliferation | miRNA catabolic process | stem cell maintenance | nuclear-transcribed mRNA catabolic process, exonucleolytic, 3'-5' | mitotic sister chromatid separation | RNA phosphodiester bond hydrolysis | RNA phosphodiester bond hydrolysis, exonucleolytic | polyuridylation-dependent mRNA catabol…	cytoplasmic mRNA processing body | cytoplasm | polysome |	C9JGP4	0	438
307	lcl|120931	897	0	TRIM46	tripartite motif-containing protein 46 isoform 6	tripartite motif-containing protein 46 isoform 6 TRIM46	zinc ion binding |		intracellular |	538260579	0	897
308	lcl|2849	675	0	GGCX	Vitamin K-dependent gamma-carboxylase	Vitamin K-dependent gamma-carboxylase GGCX	gamma-glutamyl carboxylase activity |	cellular protein modification process | blood coagulation | peptidyl-glutamic acid carboxylation | post-translational protein modification | cellular protein metabolic process |	endoplasmic reticulum membrane | membrane | integral component of membrane |	P38435 21361163	2	673
309	lcl|153085	324	0	MTMR1	Myotubularin-related protein 1	Myotubularin-related protein 1 MTMR1	phosphatidylinositol-3-phosphatase activity | protein tyrosine phosphatase activity |	phospholipid metabolic process | phosphatidylinositol biosynthetic process | small molecule metabolic process |	cytoplasm | cytosol | plasma membrane |	E9PPP8	32	292
310	lcl|154854	50	0	ALDH3B2	Aldehyde dehydrogenase family 3 member B2 (Fragment)	Aldehyde dehydrogenase family 3 member B2 (Fragment) ALDH3B2	3-chloroallyl aldehyde dehydrogenase activity | aldehyde dehydrogenase [NAD(P)+] activity |	alcohol metabolic process | ethanol catabolic process | lipid metabolic process |		H0YEC0	0	50
311	lcl|111602	88	0		Seven transmembrane helix receptor	Seven transmembrane helix receptor				Q8NGB5	8	80
312	lcl|124941	622	0	TAX1BP1	Tax1-binding protein 1 (Fragment)	Tax1-binding protein 1 (Fragment) TAX1BP1	protein binding | kinase binding |	apoptotic process | negative regulation of NF-kappaB transcription factor activity | negative regulation of type I interferon production | negative regulation of apoptotic process | innate immune response |	cytosol |	H7C3L5	0	622
313	lcl|88619	1996	0	IFT122	PREDICTED: intraflagellar transport protein 122 homolog isoform X15	PREDICTED: intraflagellar transport protein 122 homolog isoform X15 IFT122	protein binding |	neural tube closure | embryonic body morphogenesis | embryonic heart tube development | intraciliary retrograde transport | embryonic digit morphogenesis | negative regulation of smoothened signaling pathway | camera-type eye morphogenesis | limb development | cilium morphogenesis | ciliary receptor clustering involved in smoothened signaling pathway | smoothened signaling pathway involved in dor…	cytoplasm | cytoskeleton | intraciliary transport particle A | photoreceptor connecting cilium | primary cilium |	578807565	20	1976
314	lcl|106596	504	0	HMGA2	high mobility group protein HMGI-C isoform b	high mobility group protein HMGI-C isoform b HMGA2	regulatory region DNA binding | protein binding transcription factor activity | core promoter binding | RNA polymerase II core promoter proximal region sequence-specific DNA binding transcription factor activity involved in positive regulation of transcription | RNA polymerase II core promoter proximal region sequence-specific DNA binding transcription factor activity involved in negative regulat…	negative regulation of transcription from RNA polymerase II promoter | DNA catabolic process, endonucleolytic | epithelial to mesenchymal transition | chondrocyte differentiation | mesodermal-endodermal cell signaling | base-excision repair | chromatin organization | regulation of transcription, DNA-templated | mitosis | mitotic G2 DNA damage checkpoint | signal transduction | multicellular organ…	nuclear chromosome | nucleus | nucleoplasm | protein-DNA complex | senescence-associated heterochromatin focus | SMAD protein complex |	62912482	32	472
315	lcl|150699	494	0	MEF2A	Myocyte-specific enhancer factor 2A	Myocyte-specific enhancer factor 2A MEF2A	RNA polymerase II regulatory region sequence-specific DNA binding | sequence-specific DNA binding RNA polymerase II transcription factor activity | RNA polymerase II core promoter proximal region sequence-specific DNA binding transcription factor activity involved in positive regulation of transcription | RNA polymerase II transcription factor binding | RNA polymerase II transcription coactivator…	mitochondrial genome maintenance | negative regulation of transcription from RNA polymerase II promoter | MAPK cascade | toll-like receptor signaling pathway | MyD88-dependent toll-like receptor signaling pathway | MyD88-independent toll-like receptor signaling pathway | transcription, DNA-templated | transcription from RNA polymerase II promoter | apoptotic process | heart development | muscle o…	nuclear chromatin | nucleus | nucleoplasm |	F8W966	14	480
316	lcl|4704	140	0	ACVR1	Putative uncharacterized protein ACVR1 (Fragment)	Putative uncharacterized protein ACVR1 (Fragment) ACVR1	protein kinase activity | protein serine/threonine kinase activity | transmembrane receptor protein serine/threonine kinase activity | receptor signaling protein serine/threonine kinase activity | transforming growth factor beta receptor activity, type I | protein binding | ATP binding | activin receptor activity, type I | peptide hormone binding | protein homodimerization activity | SMAD binding…	G1/S transition of mitotic cell cycle | patterning of blood vessels | urogenital system development | in utero embryonic development | gastrulation with mouth forming second | mesoderm formation | neural crest cell migration | acute inflammatory response | embryonic heart tube morphogenesis | mitral valve morphogenesis | atrial septum primum morphogenesis | protein phosphorylation | transforming …	integral component of plasma membrane | apical part of cell | activin receptor complex |	Q53SF4	0	140
317	lcl|123009	62	0	PVRL1	Poliovirus receptor-related 1 beta isoform (Fragment)	Poliovirus receptor-related 1 beta isoform (Fragment) PVRL1	virus receptor activity | protein binding | coreceptor activity | carbohydrate binding | protein homodimerization activity | virion binding | protein heterodimerization activity | cell adhesion molecule binding |	lens morphogenesis in camera-type eye | desmosome organization | iron ion transport | immune response | cell adhesion | homophilic cell adhesion | heterophilic cell-cell adhesion | signal transduction | axon guidance | single organismal cell-cell adhesion | cell junction assembly | adherens junction organization | cell-cell junction organization | viral entry into host cell | regulation of synaps…	extracellular region | plasma membrane | adherens junction | cell-cell adherens junction | membrane | integral component of membrane | axon | growth cone membrane | intracellular membrane-bounded organelle | synapse |	Q6SYC0	0	62
318	lcl|152057	31	0	HLA-C	MHC class I antigen (Fragment)	MHC class I antigen (Fragment) HLA-C	receptor binding | peptide antigen binding | peptide antigen binding | peptide antigen binding | TAP binding |	positive regulation of T cell mediated cytotoxicity | antigen processing and presentation of peptide antigen via MHC class I | antigen processing and presentation of exogenous peptide antigen via MHC class I, TAP-dependent | antigen processing and presentation of exogenous peptide antigen via MHC class I, TAP-independent | antigen processing and presentation of endogenous peptide antigen via MHC …	Golgi membrane | extracellular region | plasma membrane | integral component of plasma membrane | cell surface | cell surface | ER to Golgi transport vesicle membrane | phagocytic vesicle membrane | early endosome membrane | MHC class I protein complex | MHC class I protein complex | extracellular vesicular exosome | integral component of lumenal side of endoplasmic reticulum membrane |	L0BXR2	4	27
319	lcl|37216	455	0	WBSCR22	Ribosome biogenesis methyltransferase WBSCR22	Ribosome biogenesis methyltransferase WBSCR22 WBSCR22	methyltransferase activity | poly(A) RNA binding |	rRNA processing | biological_process |	cellular_component | nucleus |	C9K060 321400149	0	455
320	lcl|31040	1065	0		cDNA FLJ10676 fis, clone NT2RP2006464, highly similar to WD repeat and HMG-box DNA-binding protein 1	cDNA FLJ10676 fis, clone NT2RP2006464, highly similar to WD repeat and HMG-box DNA-binding protein 1				B3KMC2	16	1049
321	lcl|140709	240	0		cDNA FLJ14548 fis, clone NT2RM2001648, highly similar to Protein transport protein Sec61 subunit alpha isoform 1	cDNA FLJ14548 fis, clone NT2RM2001648, highly similar to Protein transport protein Sec61 subunit alpha isoform 1				B3KNG2	12	228
322	lcl|15799	383	0		Nuclear phosphoprotein similar to S. cerevisiae PWP1 variant (Fragment)	Nuclear phosphoprotein similar to S. cerevisiae PWP1 variant (Fragment)				Q53FW9	8	375
323	lcl|102404	20	0	COI	Cytochrome c oxidase subunit 1 (Fragment)	Cytochrome c oxidase subunit 1 (Fragment) COI				U3M9R5	0	20
324	lcl|115667	2128	0	QSER1	PREDICTED: glutamine and serine-rich protein 1 isoform X1	PREDICTED: glutamine and serine-rich protein 1 isoform X1 QSER1				578820798	29	2099
325	lcl|136826	883	0	GABBR1	Gamma-aminobutyric acid (GABA) B receptor, 1	Gamma-aminobutyric acid (GABA) B receptor, 1 GABBR1	G-protein coupled GABA receptor activity | G-protein coupled GABA receptor activity | protein binding |	adenylate cyclase-inhibiting G-protein coupled receptor signaling pathway | negative regulation of adenylate cyclase activity | gamma-aminobutyric acid signaling pathway | synaptic transmission |	extracellular region | cytoplasm | plasma membrane | integral component of plasma membrane | cell junction | dendrite | G-protein coupled receptor heterodimeric complex | presynaptic membrane | postsynaptic membrane |	Q8IW08	14	869
326	lcl|60732	242	0	SF3B1	Splicing factor 3B subunit 1 (Fragment)	Splicing factor 3B subunit 1 (Fragment) SF3B1	chromatin binding | protein binding | poly(A) RNA binding |	RNA splicing, via transesterification reactions | mRNA splicing, via spliceosome | mRNA splicing, via spliceosome | mRNA splicing, via spliceosome | RNA splicing | anterior/posterior pattern specification | gene expression |	nucleus | nucleoplasm | spliceosomal complex | U12-type spliceosomal complex | nuclear speck | catalytic step 2 spliceosome |	H7C341	4	238
327	lcl|59013	264	0	ADIPOR1	Adiponectin receptor protein 1 (Fragment)	Adiponectin receptor protein 1 (Fragment) ADIPOR1	receptor activity | protein kinase binding | hormone binding | identical protein binding | protein heterodimerization activity |	hormone-mediated signaling pathway | fatty acid oxidation | negative regulation of cell growth | leptin-mediated signaling pathway | adiponectin-activated signaling pathway | positive regulation of JAK-STAT cascade | positive regulation of insulin receptor signaling pathway |	plasma membrane | integral component of membrane |	C9JNM5	20	244
328	lcl|56486	354	0	CNOT6L	CCR4-NOT transcription complex subunit 6-like (Fragment)	CCR4-NOT transcription complex subunit 6-like (Fragment) CNOT6L	poly(A)-specific ribonuclease activity | protein binding | metal ion binding |	nuclear-transcribed mRNA catabolic process, deadenylation-dependent decay | nuclear-transcribed mRNA poly(A) tail shortening | transcription, DNA-templated | regulation of transcription, DNA-templated | regulation of translation | positive regulation of cell proliferation | gene expression | positive regulation of cytoplasmic mRNA processing body assembly | RNA metabolic process | mRNA metabolic …	nucleus | cytoplasm | cytosol | CCR4-NOT complex |	H0YA76	4	350
329	lcl|120695	413	0	IGF2	insulin-like growth factor II isoform 2	insulin-like growth factor II isoform 2 IGF2	insulin receptor binding | insulin-like growth factor receptor binding | hormone activity | protein binding | growth factor activity | receptor activator activity | protein serine/threonine kinase activator activity |	skeletal system development | osteoblast differentiation | positive regulation of protein phosphorylation | platelet degranulation | glucose metabolic process | regulation of gene expression by genetic imprinting | regulation of transcription, DNA-templated | multicellular organismal development | female pregnancy | blood coagulation | memory | positive regulation of cell proliferation | insulin …	extracellular region | extracellular space | plasma membrane | platelet alpha granule lumen |	189083846	12	401
330	lcl|41246	393	0	P2RY12	P2Y purinoceptor 12	P2Y purinoceptor 12 P2RY12	G-protein coupled adenosine receptor activity | ADP receptor activity | guanyl-nucleotide exchange factor activity |	adenylate cyclase-modulating G-protein coupled receptor signaling pathway | blood coagulation | hemostasis | negative regulation of norepinephrine secretion | cell projection organization | platelet activation | regulation of GTPase activity | positive regulation of ion transport | protein kinase B signaling | negative regulation of cell differentiation | regulation of calcium ion transport | pla…	plasma membrane | caveola | external side of plasma membrane | basal plasma membrane | integral component of membrane |	Q9H244 12232483 29029605	0	393
331	lcl|35378	209	0	MYH9	Non-muscle myosin heavy chain (Fragment)	Non-muscle myosin heavy chain (Fragment) MYH9	microfilament motor activity | motor activity | actin binding | protein binding | calmodulin binding | ATP binding | ATPase activity | actin-dependent ATPase activity | actin-dependent ATPase activity | protein homodimerization activity | protein anchor | ADP binding | poly(A) RNA binding | actin filament binding | actin filament binding | actin filament binding |	meiotic spindle organization | cytokinesis | angiogenesis | in utero embryonic development | establishment of T cell polarity | ATP catabolic process | membrane protein ectodomain proteolysis | integrin-mediated signaling pathway | axon guidance | myoblast fusion | regulation of cell shape | protein transport | single organismal cell-cell adhesion | actin filament-based movement | platelet format…	stress fiber | ruffle | immunological synapse | uropod | nucleus | cytoplasm | spindle | actomyosin contractile ring | cytosol | plasma membrane | plasma membrane | cell-cell adherens junction | COP9 signalosome | integrin complex | actin cytoskeleton | myosin II complex | cortical cytoskeleton | cell leading edge | neuromuscular junction | cleavage furrow | actomyosin | protein complex | extrace…	Q2PS10	0	209
332	lcl|67110	94	0	FKBP1A	peptidyl-prolyl cis-trans isomerase FKBP1A isoform b	peptidyl-prolyl cis-trans isomerase FKBP1A isoform b FKBP1A	peptidyl-prolyl cis-trans isomerase activity | peptidyl-prolyl cis-trans isomerase activity | signal transducer activity | transforming growth factor beta-activated receptor activity | transforming growth factor beta receptor binding | ryanodine-sensitive calcium-release channel activity | protein binding | macrolide binding | FK506 binding | FK506 binding | calcium channel inhibitor activity | t…	protein peptidyl-prolyl isomerization | protein peptidyl-prolyl isomerization | heart morphogenesis | protein folding | 'de novo' protein folding | transforming growth factor beta receptor signaling pathway | SMAD protein complex assembly | peptidyl-proline modification | protein maturation by protein folding | positive regulation of protein ubiquitination | positive regulation of protein binding…	cytoplasm | cytosol | cytosol | terminal cisterna | membrane | Z disc | axon | sarcoplasmic reticulum membrane |	315139020	2	92
333	lcl|52085	304	0	HLA-G	MHC class I antigen (Fragment)	MHC class I antigen (Fragment) HLA-G	receptor binding | peptide antigen binding | protein homodimerization activity |	positive regulation of T cell mediated cytotoxicity | antigen processing and presentation of peptide antigen via MHC class I | antigen processing and presentation of exogenous peptide antigen via MHC class I, TAP-dependent | antigen processing and presentation of exogenous peptide antigen via MHC class I, TAP-independent | positive regulation of T cell tolerance induction | immune response-inhibi…	Golgi membrane | plasma membrane | ER to Golgi transport vesicle membrane | phagocytic vesicle membrane | early endosome membrane | MHC class I protein complex | integral component of lumenal side of endoplasmic reticulum membrane |	C7SJ32	0	304
334	lcl|14607	124	0	ND5	NADH-ubiquinone oxidoreductase chain 5	NADH-ubiquinone oxidoreductase chain 5 ND5				H9M473	12	112
335	lcl|100475	78	0	ATXN3	Ataxin-3	Ataxin-3 ATXN3	ubiquitin thiolesterase activity | ubiquitin-specific protease activity | protein binding | omega peptidase activity | ubiquitin protein ligase binding | identical protein binding |	microtubule cytoskeleton organization | nucleotide-excision repair | transcription, DNA-templated | regulation of transcription, DNA-templated | misfolded or incompletely synthesized protein catabolic process | synaptic transmission | nervous system development | cell death | regulation of cell-substrate adhesion | actin cytoskeleton organization | monoubiquitinated protein deubiquitination | pro…	nucleoplasm | cytoplasm | nuclear matrix |	G3V4F4	0	78
336	lcl|67681	165	0	HLA-C	MHC class I antigen (Fragment)	MHC class I antigen (Fragment) HLA-C	receptor binding | peptide antigen binding | peptide antigen binding | peptide antigen binding | TAP binding |	positive regulation of T cell mediated cytotoxicity | antigen processing and presentation of peptide antigen via MHC class I | antigen processing and presentation of exogenous peptide antigen via MHC class I, TAP-dependent | antigen processing and presentation of exogenous peptide antigen via MHC class I, TAP-independent | antigen processing and presentation of endogenous peptide antigen via MHC …	Golgi membrane | extracellular region | plasma membrane | integral component of plasma membrane | cell surface | cell surface | ER to Golgi transport vesicle membrane | phagocytic vesicle membrane | early endosome membrane | MHC class I protein complex | MHC class I protein complex | extracellular vesicular exosome | integral component of lumenal side of endoplasmic reticulum membrane |	E7BYD0	0	165
337	lcl|66560	55	0	MCM3	DNA replication licensing factor MCM3	DNA replication licensing factor MCM3 MCM3	DNA binding | DNA helicase activity | protein binding | ATP binding |	G1/S transition of mitotic cell cycle | mitotic cell cycle | DNA replication | DNA replication initiation | DNA strand elongation involved in DNA replication |	nucleus | nucleoplasm | alpha DNA polymerase:primase complex | MCM complex | perinuclear region of cytoplasm |	M0QYS9	0	55
338	lcl|16862	762	0	PMPCB	Mitochondrial-processing peptidase subunit beta	Mitochondrial-processing peptidase subunit beta PMPCB	metalloendopeptidase activity | metal ion binding |	protein targeting to mitochondrion | cellular protein metabolic process |	mitochondrial inner membrane | mitochondrial matrix |	F8WEC8	12	750
339	lcl|62556	621	0	RIOK2	serine/threonine-protein kinase RIO2 isoform 2	serine/threonine-protein kinase RIO2 isoform 2 RIOK2	protein serine/threonine kinase activity | ATP binding |			229331971	10	611
340	lcl|46554	261	0	ATXN3	Ataxin 3 variant ref (Fragment)	Ataxin 3 variant ref (Fragment) ATXN3	ubiquitin thiolesterase activity | ubiquitin-specific protease activity | protein binding | omega peptidase activity | ubiquitin protein ligase binding | identical protein binding |	microtubule cytoskeleton organization | nucleotide-excision repair | transcription, DNA-templated | regulation of transcription, DNA-templated | misfolded or incompletely synthesized protein catabolic process | synaptic transmission | nervous system development | cell death | regulation of cell-substrate adhesion | actin cytoskeleton organization | monoubiquitinated protein deubiquitination | pro…	nucleoplasm | cytoplasm | nuclear matrix |	D3VVG8	4	257
341	lcl|4278	710	0	AS3MT	Arsenite methyltransferase	Arsenite methyltransferase AS3MT	arsenite methyltransferase activity | methylarsonite methyltransferase activity |	toxin metabolic process | arsonoacetate metabolic process |	mitochondrion | cytosol |	Q9HBK9 109389364	10	700
342	lcl|60184	316	0	SERPINH1	Serpin H1 (Fragment)	Serpin H1 (Fragment) SERPINH1	serine-type endopeptidase inhibitor activity | collagen binding | poly(A) RNA binding | unfolded protein binding |	response to unfolded protein | negative regulation of endopeptidase activity | regulation of proteolysis | extracellular matrix organization | collagen fibril organization | collagen biosynthetic process | protein maturation |	extracellular space | endoplasmic reticulum | endoplasmic reticulum lumen | endoplasmic reticulum-Golgi intermediate compartment |	E9PJH8	4	312
343	lcl|89149	184	0	CSNK1D	Casein kinase I isoform delta (Fragment)	Casein kinase I isoform delta (Fragment) CSNK1D	glycoprotein binding | protein kinase activity | protein kinase activity | protein kinase activity | protein serine/threonine kinase activity | protein binding | ATP binding | peptide binding | tau-protein kinase activity | phosphoprotein binding |	G2/M transition of mitotic cell cycle | mitotic cell cycle | positive regulation of protein phosphorylation | DNA repair | protein phosphorylation | signal transduction | Wnt signaling pathway | positive regulation of proteasomal ubiquitin-dependent protein catabolic process | circadian regulation of gene expression | regulation of circadian rhythm | spindle assembly | positive regulation of cano…	nucleus | Golgi apparatus | centrosome | spindle | cytosol | spindle microtubule | plasma membrane | perinuclear region of cytoplasm |	H0Y2N6	0	184
344	lcl|3030	91	0	ZSCAN18	Zinc finger and SCAN domain-containing protein 18 (Fragment)	Zinc finger and SCAN domain-containing protein 18 (Fragment) ZSCAN18	sequence-specific DNA binding RNA polymerase II transcription factor activity | DNA binding | metal ion binding |	regulation of transcription from RNA polymerase II promoter | transcription from RNA polymerase II promoter |	nucleus |	M0QZ65	4	87
345	lcl|58508	359	0	RHD	Rh blood group, D antigen	Rh blood group, D antigen RHD	ammonium transmembrane transporter activity |		integral component of plasma membrane |	K4RNY0	8	351
346	lcl|100081	546	0	EIF1AY	Eukaryotic translation initiation factor 1A, Y-chromosomal	Eukaryotic translation initiation factor 1A, Y-chromosomal EIF1AY	translation initiation factor activity | protein binding |			O14602 33356163	0	546
347	lcl|25129	477	0	COL2A1	Alpha-1 collagen type II (Fragment)	Alpha-1 collagen type II (Fragment) COL2A1	extracellular matrix structural constituent conferring tensile strength | identical protein binding | metal ion binding | platelet-derived growth factor binding |	skeletal system development | cartilage condensation | tissue homeostasis | endochondral ossification | chondrocyte differentiation | heart morphogenesis | proteoglycan metabolic process | axon guidance | central nervous system development | visual perception | sensory perception of sound | regulation of gene expression | extracellular matrix disassembly | extracellular matrix organization | coll…	extracellular region | collagen type II | basement membrane | extracellular space | endoplasmic reticulum lumen |	Q2V4X9	6	471
348	lcl|149894	166	0	G2E3	G2/M phase-specific E3 ubiquitin-protein ligase (Fragment)	G2/M phase-specific E3 ubiquitin-protein ligase (Fragment) G2E3	ubiquitin-protein ligase activity | zinc ion binding |	protein polyubiquitination | blastocyst development | apoptotic process | negative regulation of intrinsic apoptotic signaling pathway |	nucleolus | cytoplasm |	H0YH90	2	164
349	lcl|155777	84	0	LOC102723783	PREDICTED: putative uncharacterized protein LOC388882-like isoform X1	PREDICTED: putative uncharacterized protein LOC388882-like isoform X1 LOC102723783				578836830 578836832 578836834 578836836 578836838 578846919 578846921 578846923 578846925 578846927	0	84
350	lcl|8930	1277	0		cDNA FLJ77595, highly similar to Homo sapiens RAS guanyl releasing protein 3 (calcium and DAG-regulated) (RASGRP3), mRNA	cDNA FLJ77595, highly similar to Homo sapiens RAS guanyl releasing protein 3 (calcium and DAG-regulated) (RASGRP3), mRNA				A8KAB8	0	1277
351	lcl|49221	967	0	AATK	PREDICTED: serine/threonine-protein kinase LMTK1 isoform X11	PREDICTED: serine/threonine-protein kinase LMTK1 isoform X11 AATK	protein serine/threonine kinase activity | protein tyrosine kinase activity | protein binding | ATP binding |	brain development | negative regulation of axon extension | Rab protein signal transduction | peptidyl-tyrosine autophosphorylation | neuron apoptotic process |	endoplasmic reticulum | integral component of membrane | axonal growth cone | perinuclear region of cytoplasm | recycling endosome |	578831691	28	939
352	lcl|6819	180	0	SPANXA2	SPANX-A2	SPANX-A2 SPANXA2		spermatogenesis |	nucleus | cytoplasm |	Q4KRP5	12	168
353	lcl|128209	185	0	HLA-F	HLA class I histocompatibility antigen, alpha chain F (Fragment)	HLA class I histocompatibility antigen, alpha chain F (Fragment) HLA-F	receptor binding | peptide antigen binding | TAP1 binding | TAP2 binding |	positive regulation of T cell mediated cytotoxicity | antigen processing and presentation of peptide antigen via MHC class I | antigen processing and presentation of exogenous peptide antigen via MHC class I, TAP-dependent | antigen processing and presentation of exogenous peptide antigen via MHC class I, TAP-independent | cytokine-mediated signaling pathway | antigen processing and presentation …	Golgi membrane | endoplasmic reticulum | plasma membrane | ER to Golgi transport vesicle membrane | phagocytic vesicle membrane | early endosome membrane | MHC class I protein complex | integral component of lumenal side of endoplasmic reticulum membrane |	H0Y4J4	4	181
354	lcl|85968	53	0	HLA-A	MHC class I antigen (Fragment)	MHC class I antigen (Fragment) HLA-A	receptor binding | receptor binding | protein binding | peptide antigen binding | peptide antigen binding | peptide antigen binding | poly(A) RNA binding | TAP binding |	positive regulation of T cell mediated cytotoxicity | positive regulation of T cell mediated cytotoxicity | antigen processing and presentation of peptide antigen via MHC class I | antigen processing and presentation of exogenous peptide antigen via MHC class I, TAP-dependent | antigen processing and presentation of exogenous peptide antigen via MHC class I, TAP-independent | antigen processing a…	Golgi membrane | plasma membrane | integral component of plasma membrane | cell surface | ER to Golgi transport vesicle membrane | phagocytic vesicle membrane | early endosome membrane | MHC class I protein complex | MHC class I protein complex | extracellular vesicular exosome | integral component of lumenal side of endoplasmic reticulum membrane |	U5YBW6	0	53
355	lcl|141478	49	0	HLA-A	MHC class I antigen (Fragment)	MHC class I antigen (Fragment) HLA-A	receptor binding | receptor binding | protein binding | peptide antigen binding | peptide antigen binding | peptide antigen binding | poly(A) RNA binding | TAP binding |	positive regulation of T cell mediated cytotoxicity | positive regulation of T cell mediated cytotoxicity | antigen processing and presentation of peptide antigen via MHC class I | antigen processing and presentation of exogenous peptide antigen via MHC class I, TAP-dependent | antigen processing and presentation of exogenous peptide antigen via MHC class I, TAP-independent | antigen processing a…	Golgi membrane | plasma membrane | integral component of plasma membrane | cell surface | ER to Golgi transport vesicle membrane | phagocytic vesicle membrane | early endosome membrane | MHC class I protein complex | MHC class I protein complex | extracellular vesicular exosome | integral component of lumenal side of endoplasmic reticulum membrane |	U5YBD2	0	49
356	lcl|13294	336	0	GID4	PREDICTED: glucose-induced degradation protein 4 homolog isoform X2	PREDICTED: glucose-induced degradation protein 4 homolog isoform X2 GID4				530410650	6	330
357	lcl|94291	363	0	SH2D5	SH2 domain-containing protein 5 (Fragment)	SH2 domain-containing protein 5 (Fragment) SH2D5				E5RGV2	66	297
358	lcl|75198	1006	0	DDX20	DEAD (Asp-Glu-Ala-Asp) box polypeptide 20	DEAD (Asp-Glu-Ala-Asp) box polypeptide 20 DDX20	DNA binding | ATP-dependent RNA helicase activity | protein binding | ATP binding | protein domain specific binding |	negative regulation of transcription from RNA polymerase II promoter | spliceosomal tri-snRNP complex assembly | spliceosomal snRNP assembly | spliceosomal snRNP assembly | ATP catabolic process | RNA processing | gene expression | RNA metabolic process | ncRNA metabolic process | positive regulation of apoptotic process | positive regulation of apoptotic process | oogenesis | regulation of stero…	nucleoplasm | cytosol | cytosol | cytoskeleton | transcriptional repressor complex | SMN complex | SMN-Sm protein complex | Gemini of coiled bodies |	Q8NEH0	6	1000
359	lcl|128654	1346	0	USP33	PREDICTED: ubiquitin carboxyl-terminal hydrolase 33 isoform X2	PREDICTED: ubiquitin carboxyl-terminal hydrolase 33 isoform X2 USP33	G-protein coupled receptor binding | cysteine-type endopeptidase activity | ubiquitin thiolesterase activity | ubiquitin-specific protease activity | ubiquitin-specific protease activity | protein binding | zinc ion binding | ubiquitin binding |	ubiquitin-dependent protein catabolic process | endocytosis | axon guidance | regulation of G-protein coupled receptor protein signaling pathway | cell migration | protein deubiquitination | centrosome duplication | protein K63-linked deubiquitination | protein K48-linked deubiquitination |	cytoplasm | Golgi apparatus | Golgi apparatus | centrosome | VCB complex | cell body | perinuclear region of cytoplasm |	530362176	24	1322
360	lcl|65640	950	0	ZNF28	Zinc finger protein 28 (Fragment)	Zinc finger protein 28 (Fragment) ZNF28	DNA binding | sequence-specific DNA binding transcription factor activity | metal ion binding |	transcription, DNA-templated | regulation of transcription, DNA-templated |	nucleus |	C9K0H3	8	942
361	lcl|142816	258	0	MCOLN3	Mucolipin 3, isoform CRA_d	Mucolipin 3, isoform CRA_d MCOLN3		locomotory behavior | ion transmembrane transport | auditory receptor cell differentiation | transmembrane transport | calcium ion transmembrane transport |	cytoplasm | plasma membrane | integral component of membrane |	B1ANB7	0	258
362	lcl|55031	3061	0	ADAMTS9	A disintegrin and metalloproteinase with thrombospondin motifs 9	A disintegrin and metalloproteinase with thrombospondin motifs 9 ADAMTS9	metalloendopeptidase activity | metallopeptidase activity | zinc ion binding |	proteolysis | glycoprotein catabolic process | multicellular organismal development | protein transport | vesicle-mediated transport | positive regulation of melanocyte differentiation |	proteinaceous extracellular matrix | extracellular space | endoplasmic reticulum | extracellular matrix |	Q9P2N4 33624896	16	3045
363	lcl|82178	133	0	LOC101060546	PREDICTED: uncharacterized protein LOC101060546 isoform X2	PREDICTED: uncharacterized protein LOC101060546 isoform X2 LOC101060546				530438067	0	133
364	lcl|53531	450	0	DNASE2B	Deoxyribonuclease II beta	Deoxyribonuclease II beta DNASE2B	deoxyribonuclease II activity |	apoptotic DNA fragmentation |	extracellular region | intracellular | lysosome |	A0AUY7	4	446
365	lcl|70327	739	0	PROM2	PREDICTED: prominin-2 isoform X2	PREDICTED: prominin-2 isoform X2 PROM2	cholesterol binding |	positive regulation of protein phosphorylation | positive regulation of cell projection organization | regulation of Cdc42 GTPase activity | negative regulation of pinocytosis | regulation of clathrin-mediated endocytosis | negative regulation of caveolin-mediated endocytosis |	integral component of plasma membrane | microvillus | cilium | cell surface | basolateral plasma membrane | apical plasma membrane | cytoplasmic vesicle | microvillus membrane | cell projection | microspike | membrane raft | ciliary membrane | extracellular vesicular exosome | prominosome |	530368509	16	723
366	lcl|69625	280	0	HLA-C	MHC class I antigen (Fragment)	MHC class I antigen (Fragment) HLA-C	receptor binding | peptide antigen binding | peptide antigen binding | peptide antigen binding | TAP binding |	positive regulation of T cell mediated cytotoxicity | antigen processing and presentation of peptide antigen via MHC class I | antigen processing and presentation of exogenous peptide antigen via MHC class I, TAP-dependent | antigen processing and presentation of exogenous peptide antigen via MHC class I, TAP-independent | antigen processing and presentation of endogenous peptide antigen via MHC …	Golgi membrane | extracellular region | plasma membrane | integral component of plasma membrane | cell surface | cell surface | ER to Golgi transport vesicle membrane | phagocytic vesicle membrane | early endosome membrane | MHC class I protein complex | MHC class I protein complex | extracellular vesicular exosome | integral component of lumenal side of endoplasmic reticulum membrane |	J7K1B5	0	280
367	lcl|54700	29	0	TENM4	Teneurin-4 (Fragment)	Teneurin-4 (Fragment) TENM4	protein homodimerization activity |	gastrulation with mouth forming second | signal transduction | positive regulation of myelination | central nervous system myelin formation | neuron development | positive regulation of oligodendrocyte differentiation | cardiac muscle cell proliferation | cardiac cell fate specification | positive regulation of gastrulation |	nucleus | cytoplasm | integral component of plasma membrane | neuron projection |	E9PPG4	2	27
368	lcl|91220	345	0	DLG5	Disks large homolog 5 (Fragment)	Disks large homolog 5 (Fragment) DLG5	protein binding | beta-catenin binding | cytoskeletal protein binding | receptor signaling complex scaffold activity |	signal transduction | negative regulation of cell proliferation | single organismal cell-cell adhesion | intracellular signal transduction | regulation of apoptotic process |	cytoplasm | plasma membrane | cell-cell adherens junction |	R4GMQ2	0	345
369	lcl|125364	265	0	SH2B3	SH2B adapter protein 3	SH2B adapter protein 3 SH2B3	signal transducer activity | protein binding | protein complex binding | phosphate ion binding |	blood coagulation | cell differentiation | embryonic hemopoiesis | intracellular signal transduction |	cytosol |	F5GYM4	8	257
370	lcl|142725	177	0	ACE	Angiotensin-converting enzyme	Angiotensin-converting enzyme ACE	actin binding | endopeptidase activity | carboxypeptidase activity | protein binding | drug binding | metallopeptidase activity | metallopeptidase activity | peptidyl-dipeptidase activity | peptidyl-dipeptidase activity | zinc ion binding | chloride ion binding | bradykinin receptor binding |	kidney development | blood vessel remodeling | angiotensin maturation | angiotensin catabolic process in blood | regulation of renal output by angiotensin | regulation of systemic arterial blood pressure by renin-angiotensin | regulation of blood pressure | regulation of smooth muscle cell migration | regulation of vasoconstriction | mononuclear cell proliferation | regulation of vasodilation | h…	extracellular region | extracellular space | endosome | plasma membrane | plasma membrane | external side of plasma membrane | integral component of membrane | extracellular vesicular exosome |	J3QKZ3	4	173
371	lcl|58007	154	0		Peptidylglycine alpha-amidating monooxygenase (Fragment)	Peptidylglycine alpha-amidating monooxygenase (Fragment)				Q13749	8	146
372	lcl|109980	10	0	HLA-B	MHC class I antigen (Fragment)	MHC class I antigen (Fragment) HLA-B	receptor binding | receptor binding | peptide antigen binding | peptide antigen binding | peptide antigen binding | TAP binding | TAP binding |	positive regulation of T cell mediated cytotoxicity | positive regulation of T cell mediated cytotoxicity | antigen processing and presentation of peptide antigen via MHC class I | antigen processing and presentation of peptide antigen via MHC class I | antigen processing and presentation of exogenous peptide antigen via MHC class I, TAP-dependent | antigen processing and presentation of exogenou…	Golgi membrane | plasma membrane | integral component of plasma membrane | cell surface | cell surface | ER to Golgi transport vesicle membrane | membrane | integral component of membrane | phagocytic vesicle membrane | early endosome membrane | MHC class I protein complex | MHC class I protein complex | extracellular vesicular exosome | integral component of lumenal side of endoplasmic reticulum…	A1Z0L3 D3G9J2 D3U3T5 D3XDG9 D3XDH0 D5FHX5 D5FHY0 D5FHY7 D6MJE9 D6MLP7 D7NPN0 D7NSR3 D9U3H5 F2VNL1 I6MHH4 K7P5S0 L0HQC3 Q6V4Z5 U3RF78 U3RKG4 W0NTJ4	0	10
373	lcl|138334	959	0	TNNT3	Troponin T, fast skeletal muscle	Troponin T, fast skeletal muscle TNNT3	actin binding | tropomyosin binding | tropomyosin binding | troponin C binding | calcium-dependent ATPase activity | troponin I binding | calcium-dependent protein binding |	skeletal muscle contraction | ATP catabolic process | regulation of striated muscle contraction | muscle filament sliding | regulation of ATPase activity |	cytosol | troponin complex |	C9JZN9	2	957
374	lcl|144280	1194	0		Uncharacterized protein	Uncharacterized protein				Q8N9G5	12	1182
375	lcl|103901	115	0	CD28	T-cell-specific surface glycoprotein CD28 isoform 3 precursor	T-cell-specific surface glycoprotein CD28 isoform 3 precursor CD28	protease binding | SH3/SH2 adaptor activity | protein binding | coreceptor activity | identical protein binding |	positive regulation of inflammatory response to antigenic stimulus | humoral immune response | cell surface receptor signaling pathway | epidermal growth factor receptor signaling pathway | fibroblast growth factor receptor signaling pathway | positive regulation of signal transduction | viral process | T cell costimulation | Fc-epsilon receptor signaling pathway | cytokine biosynthetic process |…	cytosol | plasma membrane | plasma membrane | integral component of plasma membrane | external side of plasma membrane |	340545510	0	115
376	lcl|56193	183	0	TEX264	Testis-expressed sequence 264 protein (Fragment)	Testis-expressed sequence 264 protein (Fragment) TEX264			extracellular region |	C9JHH5	2	181
377	lcl|99806	144	0		Immunglobulin heavy chain variable region (Fragment)	Immunglobulin heavy chain variable region (Fragment)				Q0ZCJ0	0	144
378	lcl|154121	16	0	Tcr-alpha	HCG2039767 (Fragment)	HCG2039767 (Fragment) Tcr-alpha				A0N4Y6	0	16
379	lcl|104956	2981	0	ITGB4	PREDICTED: integrin beta-4 isoform X6	PREDICTED: integrin beta-4 isoform X6 ITGB4	receptor activity | protein binding |	cell adhesion | cell-matrix adhesion | integrin-mediated signaling pathway | multicellular organismal development | response to wounding | extracellular matrix organization | hemidesmosome assembly | hemidesmosome assembly | cell junction assembly | filopodium assembly | cell motility |	basement membrane | plasma membrane | plasma membrane | integrin complex | basal plasma membrane | cell surface | hemidesmosome | cell leading edge | receptor complex | extracellular vesicular exosome |	578830853	38	2943
380	lcl|47303	1192	0	RBM47	RNA-binding protein 47	RNA-binding protein 47 RBM47	nucleotide binding | poly(A) RNA binding |		nucleus |	A0AV96 530376664 530376672 530376674 530376676 148833513	34	1158
381	lcl|20933	95	0	HLA-DR08	MHC class II antigen (Fragment)	MHC class II antigen (Fragment) HLA-DR08				S4T6T5	0	95
382	lcl|17794	40	0		cDNA FLJ41431 fis, clone BRHIP2005932, highly similar to Cysteine protease ATG4B (EC 3.4.22.-)	cDNA FLJ41431 fis, clone BRHIP2005932, highly similar to Cysteine protease ATG4B (EC 3.4.22.-)				B3KVU2	0	40
383	lcl|35605	212	0	KIR2DL1	KIR2DL1 (Fragment)	KIR2DL1 (Fragment) KIR2DL1	receptor activity | protein binding |	natural killer cell inhibitory signaling pathway | immune response | regulation of immune response |	plasma membrane | plasma membrane | integral component of plasma membrane |	Q1KMT8	0	212
384	lcl|104963	980	0	FGFR1	PREDICTED: fibroblast growth factor receptor 1 isoform X8	PREDICTED: fibroblast growth factor receptor 1 isoform X8 FGFR1	protein tyrosine kinase activity | fibroblast growth factor-activated receptor activity | fibroblast growth factor-activated receptor activity | protein binding | ATP binding | heparin binding | fibroblast growth factor binding | identical protein binding | protein homodimerization activity |	negative regulation of transcription from RNA polymerase II promoter | MAPK cascade | skeletal system development | angiogenesis | ureteric bud development | in utero embryonic development | organ induction | neuron migration | positive regulation of mesenchymal cell proliferation | chondrocyte differentiation | transcription, DNA-templated | protein phosphorylation | epidermal growth factor rece…	extracellular region | nucleus | cytosol | plasma membrane | plasma membrane | integral component of plasma membrane | integral component of membrane | cytoplasmic membrane-bounded vesicle | receptor complex |	578815245 578815247 578815249	8	972
385	lcl|118937	255	0		cDNA FLJ57762, highly similar to Aldehyde dehydrogenase 1A3 (EC 1.2.1.5)	cDNA FLJ57762, highly similar to Aldehyde dehydrogenase 1A3 (EC 1.2.1.5)				B4E0M6	8	247
386	lcl|26156	92	0	STARD10	PCTP-like protein (Fragment)	PCTP-like protein (Fragment) STARD10	protein binding | lipid binding |	lipid transport |	cytoplasm | membrane | cell projection |	F5H5A8	0	92
387	lcl|64710	209	0	FGF12	PREDICTED: fibroblast growth factor 12 isoform X2	PREDICTED: fibroblast growth factor 12 isoform X2 FGF12	fibroblast growth factor receptor binding | growth factor activity | heparin binding | sodium channel regulator activity | ion channel binding |	regulation of membrane depolarization | signal transduction | JNK cascade | cell-cell signaling | synaptic transmission | nervous system development | heart development | adult locomotory behavior | fibroblast growth factor receptor signaling pathway | fibroblast growth factor receptor signaling pathway | positive regulation of sodium ion transport | neuromuscular process | cardiac muscle cell ac…	extracellular space | nucleus |	578807162	0	209
388	lcl|35292	1650	0	AMBRA1	PREDICTED: activating molecule in BECN1-regulated autophagy protein 1 isoform X3	PREDICTED: activating molecule in BECN1-regulated autophagy protein 1 isoform X3 AMBRA1	protein binding |	autophagy | negative regulation of cell proliferation | neural tube development | cell differentiation | negative regulation of neuron apoptotic process |	cytoplasm | autophagic vacuole | axoneme | cytoplasmic vesicle |	530395545	40	1610
389	lcl|28229	1542	0	ARHGEF1	ARHGEF1 protein	ARHGEF1 protein ARHGEF1	Rho guanyl-nucleotide exchange factor activity | GTPase activator activity | protein binding | poly(A) RNA binding |	Rho protein signal transduction | cell proliferation | regulation of Rho GTPase activity | termination of G-protein coupled receptor signaling pathway | neurotrophin TRK receptor signaling pathway | regulation of axonogenesis | negative regulation of axonogenesis |	cytosol | plasma membrane |	Q6NX52	8	1534
390	lcl|25944	582	0	LRRC39	Leucine-rich repeat-containing protein 39	Leucine-rich repeat-containing protein 39 LRRC39				Q96DD0 373838757 373838765 21389431	0	582
391	lcl|145679	241	0	KLK11	kallikrein-11 isoform 3 precursor	kallikrein-11 isoform 3 precursor KLK11	serine-type endopeptidase activity | serine-type peptidase activity |		extracellular region | Golgi apparatus |	262527289	4	237
392	lcl|92540	1189	0	FAM129C	Niban-like protein 2	Niban-like protein 2 FAM129C				M0QX95	14	1175
393	lcl|25784	637	0		Catalase	Catalase				B4DWK8	8	629
394	lcl|36718	228	0		cDNA FLJ57205, highly similar to Homo sapiens Rho GTPase activating protein 17 (ARHGAP17), transcript variant 1, mRNA	cDNA FLJ57205, highly similar to Homo sapiens Rho GTPase activating protein 17 (ARHGAP17), transcript variant 1, mRNA				B4DVF3	4	224
395	lcl|35802	329	0	RAB2B	cDNA FLJ59988, highly similar to Ras-related protein Rab-2B	cDNA FLJ59988, highly similar to Ras-related protein Rab-2B RAB2B	GTP binding |	small GTPase mediated signal transduction | protein transport | vesicle-mediated transport | positive regulation of exocytosis |	Golgi membrane | endoplasmic reticulum membrane | plasma membrane |	B4DUD4 254281345	16	313
396	lcl|22088	138	0	hCG_39951	Olfactory receptor	Olfactory receptor hCG_39951				Q8NGY4	0	138
397	lcl|59969	21	0	ATP8	ATP synthase protein 8	ATP synthase protein 8 ATP8				A4ZLL2	0	21
398	lcl|118994	688	0	PPP3CC	serine/threonine-protein phosphatase 2B catalytic subunit gamma isoform isoform 3	serine/threonine-protein phosphatase 2B catalytic subunit gamma isoform isoform 3 PPP3CC	phosphoprotein phosphatase activity | calmodulin binding | metal ion binding |	apoptotic process | intrinsic apoptotic signaling pathway | positive regulation of protein insertion into mitochondrial membrane involved in apoptotic signaling pathway |	cytosol |	345842414	28	660
399	lcl|107424	2110	0	SGOL2	shugoshin-like 2 isoform 2	shugoshin-like 2 isoform 2 SGOL2	protein binding |	mitotic cell cycle | chromosome segregation | meiotic nuclear division |	chromosome, centromeric region | condensed chromosome kinetochore | cytosol | mitotic cohesin complex |	229892308	12	2098
400	lcl|142986	1102	0	MID1	E3 ubiquitin-protein ligase Midline-1	E3 ubiquitin-protein ligase Midline-1 MID1	microtubule binding | zinc ion binding | ligase activity | ubiquitin protein ligase binding | protein homodimerization activity | protein heterodimerization activity | phosphoprotein binding |	microtubule cytoskeleton organization | pattern specification process | positive regulation of stress-activated MAPK cascade | protein localization to microtubule |	spindle | microtubule | microtubule associated complex | cytoplasmic microtubule |	O15344 4557753 300797132 15451852 148833499	14	1088
401	lcl|21801	746	0	SNX1	PREDICTED: sorting nexin-1 isoform X2	PREDICTED: sorting nexin-1 isoform X2 SNX1	protein binding | phosphatidylinositol binding |	intracellular protein transport | endocytosis | early endosome to Golgi transport | positive regulation of protein catabolic process |	cytoplasm | Golgi apparatus | cytosol | endosome membrane | cytoplasmic membrane-bounded vesicle | early endosome membrane |	530406334	6	740
402	lcl|53049	518	0	HMGN5	High mobility group nucleosome-binding domain-containing protein 5 (Fragment)	High mobility group nucleosome-binding domain-containing protein 5 (Fragment) HMGN5	chromatin binding | nucleosomal DNA binding | poly(A) RNA binding |	transcription, DNA-templated | regulation of transcription, DNA-templated | regulation of transcription from RNA polymerase II promoter | chromatin modification | positive regulation of transcription, DNA-templated |	chromatin | nucleus | nucleoplasm |	Q5JSK7	6	512
403	lcl|39984	673	0	UBAP2L	PREDICTED: ubiquitin-associated protein 2-like isoform X25	PREDICTED: ubiquitin-associated protein 2-like isoform X25 UBAP2L	protein binding | poly(A) RNA binding |	binding of sperm to zona pellucida |	Ada2/Gcn5/Ada3 transcription activator complex |	578801861	6	667
404	lcl|2928	582	0	PUS1	tRNA pseudouridine synthase A, mitochondrial (Fragment)	tRNA pseudouridine synthase A, mitochondrial (Fragment) PUS1	DNA binding | pseudouridylate synthase activity | pseudouridine synthase activity | ligand-dependent nuclear receptor transcription coactivator activity | poly(A) RNA binding |	tRNA pseudouridine synthesis | positive regulation of transcription from RNA polymerase II promoter |	transcription factor complex | nucleolus | mitochondrion |	F5H1B2	16	566
405	lcl|119681	229	0	BAIAP3	BAI1-associated protein 3 (Fragment)	BAI1-associated protein 3 (Fragment) BAIAP3	protein C-terminus binding |	G-protein coupled receptor signaling pathway | neurotransmitter secretion |		H3BV46	0	229
406	lcl|15984	140	0	PTPRN	Receptor-type tyrosine-protein phosphatase-like N (Fragment)	Receptor-type tyrosine-protein phosphatase-like N (Fragment) PTPRN	transmembrane receptor protein tyrosine phosphatase activity | protein binding | spectrin binding | GTPase binding |	response to reactive oxygen species | response to glucose | cytokine-mediated signaling pathway | response to insulin | peptidyl-tyrosine dephosphorylation | response to estrogen | response to cAMP |	integral component of plasma membrane |	H7C0U9	0	140
407	lcl|2377	362	0	NRSN1	Neurensin-1	Neurensin-1 NRSN1		nervous system development |	integral component of membrane | cytoplasmic membrane-bounded vesicle | transport vesicle | growth cone | neuron projection | neuronal cell body |	Q8IZ57 189217874	10	352
408	lcl|66259	766	0		cDNA FLJ60942, highly similar to Phosphatidylinositol 3-kinase regulatory subunit gamma	cDNA FLJ60942, highly similar to Phosphatidylinositol 3-kinase regulatory subunit gamma				B4DXM8	22	744
409	lcl|57377	1057	0	EXOC6	Exocyst complex component 6	Exocyst complex component 6 EXOC6		vesicle docking involved in exocytosis | protein transport | erythrocyte differentiation | cellular protein metabolic process | membrane organization |	exocyst | plasma membrane |	F2Z2Q3 530393858	16	1041
410	lcl|19448	353	0	HLA-Cw	MHC class I antigen (Fragment)	MHC class I antigen (Fragment) HLA-Cw				B5AFW3	0	353
411	lcl|91695	284	0	VPS53	VPS53 protein	VPS53 protein VPS53	protein binding |	protein transport |	GARP complex | endosome membrane |	Q8NCR1	12	272
412	lcl|67903	4103	0	KALRN	PREDICTED: kalirin isoform X5	PREDICTED: kalirin isoform X5 KALRN	protein serine/threonine kinase activity | guanyl-nucleotide exchange factor activity | Rho guanyl-nucleotide exchange factor activity | protein binding | ATP binding | metal ion binding |	protein phosphorylation | signal transduction | small GTPase mediated signal transduction | nervous system development | vesicle-mediated transport | intracellular signal transduction | positive regulation of apoptotic process | regulation of GTPase activity | neurotrophin TRK receptor signaling pathway | regulation of small GTPase mediated signal transduction | apoptotic signaling pathway |	cytosol | actin cytoskeleton | extracellular vesicular exosome |	578807879	68	4035
413	lcl|14443	451	0	NPIPA1	Nuclear pore complex-interacting protein family member A1 (Fragment)	Nuclear pore complex-interacting protein family member A1 (Fragment) NPIPA1		protein transport | mRNA transport |	nuclear pore | nuclear membrane |	H0YED6	10	441
414	lcl|25101	473	0	DMWD	Dystrophia myotonica WD repeat-containing protein (Fragment)	Dystrophia myotonica WD repeat-containing protein (Fragment) DMWD	molecular_function |		cellular_component |	R4GMZ4	4	469
415	lcl|16384	586	0	CYBB	Cytochrome b-245 heavy chain	Cytochrome b-245 heavy chain CYBB	voltage-gated ion channel activity | protein binding | electron carrier activity | superoxide-generating NADPH oxidase activity | superoxide-generating NADPH oxidase activity | heme binding | metal ion binding | protein heterodimerization activity | flavin adenine dinucleotide binding |	antigen processing and presentation of peptide antigen via MHC class I | antigen processing and presentation of exogenous peptide antigen via MHC class I, TAP-dependent | superoxide metabolic process | superoxide metabolic process | inflammatory response | response to nutrient | response to drug | superoxide anion generation | superoxide anion generation | antigen processing and presentation of e…	mitochondrion | rough endoplasmic reticulum | Golgi apparatus | integral component of plasma membrane | dendrite | phagocytic vesicle membrane | NADPH oxidase complex | NADPH oxidase complex | neuronal cell body |	P04839 6996021	0	586
416	lcl|53997	88	0		Ig kappa chain V-I region Roy	Ig kappa chain V-I region Roy				P01608	0	88
417	lcl|145459	973	0	SNCAIP	PREDICTED: synphilin-1 isoform X8	PREDICTED: synphilin-1 isoform X8 SNCAIP	protein binding | ubiquitin protein ligase binding | identical protein binding |	cell death | dopamine metabolic process | regulation of neurotransmitter secretion | regulation of inclusion body assembly |	cytoplasm | presynaptic membrane | neuronal cell body |	578810679	12	961
418	lcl|40000	486	0		cDNA, FLJ78945, highly similar to Nasal embryonic luteinizing hormone-releasing hormone factor	cDNA, FLJ78945, highly similar to Nasal embryonic luteinizing hormone-releasing hormone factor				B7Z9T1	8	478
419	lcl|108452	85	0	METTL23	Methyltransferase-like protein 23	Methyltransferase-like protein 23 METTL23	methyltransferase activity |		cytoplasm | integral component of membrane |	K7EJ00	10	75
420	lcl|129821	1038	0		cDNA FLJ58638, highly similar to Homo sapiens Rho GTPase activating protein 28 (ARHGAP28), transcript variant 1, mRNA	cDNA FLJ58638, highly similar to Homo sapiens Rho GTPase activating protein 28 (ARHGAP28), transcript variant 1, mRNA				B4DXL2	12	1026
421	lcl|94388	9	0	GLT8D1	Glycosyltransferase 8 domain-containing protein 1 (Fragment)	Glycosyltransferase 8 domain-containing protein 1 (Fragment) GLT8D1	transferase activity, transferring glycosyl groups |		integral component of membrane |	C9J6X9	0	9
422	lcl|88151	289	0	irs-2	Insulin receptor substrate-2 (Fragment)	Insulin receptor substrate-2 (Fragment) irs-2				Q8TF73	12	277
423	lcl|147865	2191	0	ZNF445	Zinc finger protein 445	Zinc finger protein 445 ZNF445	DNA binding | sequence-specific DNA binding transcription factor activity | metal ion binding |	transcription, DNA-templated |	nucleus |	P59923 530372390 31340735	0	2191
424	lcl|51258	364	0		cDNA FLJ45974 fis, clone PLACE7018452	cDNA FLJ45974 fis, clone PLACE7018452				Q6ZRY6	0	364
425	lcl|145036	326	0	CETP	Cholesteryl ester transfer protein	Cholesteryl ester transfer protein CETP	lipid transporter activity | phospholipid transporter activity | lipid binding | cholesterol binding | cholesterol transporter activity | triglyceride binding | phosphatidylcholine binding |	triglyceride metabolic process | lipid transport | receptor-mediated endocytosis | cholesterol metabolic process | cholesterol metabolic process | negative regulation of macrophage derived foam cell differentiation | regulation of cholesterol efflux | phospholipid transport | cholesterol transport | very-low-density lipoprotein particle remodeling | low-density lipoprotein particle remodeling | h…	extracellular region | extracellular space | vesicle | high-density lipoprotein particle | extracellular vesicular exosome |	P11597 169636439	9	317
426	lcl|37368	238	0	CEP128	Centrosomal protein of 128 kDa (Fragment)	Centrosomal protein of 128 kDa (Fragment) CEP128			spindle pole | centriole |	Q86TS1	0	238
427	lcl|102870	44	0	ZNF410	Zinc finger protein 410 (Fragment)	Zinc finger protein 410 (Fragment) ZNF410	DNA binding | metal ion binding |	transcription, DNA-templated | regulation of transcription, DNA-templated |	nucleus |	G3V3W2	0	44
428	lcl|137954	365	0	FAM35A	PREDICTED: protein FAM35A isoform X8	PREDICTED: protein FAM35A isoform X8 FAM35A				578819591	4	361
429	lcl|79206	1286	0	PRC1	PREDICTED: protein regulator of cytokinesis 1 isoform X4	PREDICTED: protein regulator of cytokinesis 1 isoform X4 PRC1	protein binding | microtubule binding | protein kinase binding | identical protein binding |	mitotic spindle elongation | cytokinesis |	spindle pole | spindle | spindle microtubule |	578827589	18	1268
430	lcl|18329	365	0	ARHGEF17	Rho guanine nucleotide exchange factor 17 (Fragment)	Rho guanine nucleotide exchange factor 17 (Fragment) ARHGEF17	guanyl-nucleotide exchange factor activity | Rho guanyl-nucleotide exchange factor activity |	small GTPase mediated signal transduction | actin cytoskeleton organization | positive regulation of apoptotic process | regulation of GTPase activity | neurotrophin TRK receptor signaling pathway | regulation of small GTPase mediated signal transduction | apoptotic signaling pathway |	cytosol |	H0YFZ8	4	361
431	lcl|152584	320	0	PBR	Peripheral-type Benzodiazepine Receptor (Fragment)	Peripheral-type Benzodiazepine Receptor (Fragment) PBR				Q8N730	0	320
432	lcl|113893	1642	0	EVC	PREDICTED: ellis-van Creveld syndrome protein isoform X3	PREDICTED: ellis-van Creveld syndrome protein isoform X3 EVC		skeletal system development | endochondral bone growth | smoothened signaling pathway | muscle organ development | positive regulation of smoothened signaling pathway | cartilage development |	cytoplasm | cilium | integral component of membrane | ciliary basal body | ciliary membrane |	578808115	20	1622
433	lcl|75958	206	0		cDNA FLJ56256, highly similar to Choline/ethanolamine kinase	cDNA FLJ56256, highly similar to Choline/ethanolamine kinase				B7Z756	0	206
434	lcl|10884	187	0	LAMB2	Laminin subunit beta-2 (Fragment)	Laminin subunit beta-2 (Fragment) LAMB2	integrin binding | structural molecule activity |	cell adhesion | axon guidance | neuromuscular junction development | visual perception | astrocyte development | Schwann cell development | extracellular matrix organization | axon extension involved in regeneration | retina development in camera-type eye | metanephric glomerular visceral epithelial cell development | metanephric glomerular basement membrane development |	extracellular region | basement membrane | basal lamina | laminin-3 complex | extracellular matrix | extracellular matrix | laminin-11 complex | synapse | extracellular vesicular exosome |	F5H520	6	181
435	lcl|72748	41	0	PRB1	basic salivary proline-rich protein 1 isoform 1 preproprotein	basic salivary proline-rich protein 1 isoform 1 preproprotein PRB1	molecular_function |	biological_process |	extracellular region |	41349482	0	41
436	lcl|107116	536	0	ACOT1	Acyl-coenzyme A thioesterase 1	Acyl-coenzyme A thioesterase 1 ACOT1	palmitoyl-CoA hydrolase activity | acyl-CoA hydrolase activity |	very long-chain fatty acid metabolic process | long-chain fatty acid metabolic process | acyl-CoA metabolic process |	cytosol |	G3V4F2	4	532
437	lcl|140473	525	0	COG8	Conserved oligomeric Golgi complex subunit 8	Conserved oligomeric Golgi complex subunit 8 COG8		protein transport |	Golgi membrane | Golgi transport complex | Golgi transport complex |	H3BQV3	4	521
438	lcl|5541	133	0	HLA-DRB1	MHC class II antigen (Fragment)	MHC class II antigen (Fragment) HLA-DRB1	MHC class II protein complex binding | MHC class II receptor activity | MHC class II receptor activity | peptide antigen binding |	immunoglobulin production involved in immunoglobulin mediated immune response | immunoglobulin production involved in immunoglobulin mediated immune response | inflammatory response to antigenic stimulus | humoral immune response mediated by circulating immunoglobulin | humoral immune response mediated by circulating immunoglobulin | immune response | immune response | detection of bacterium | cy…	Golgi membrane | lysosomal membrane | lysosomal membrane | plasma membrane | integral component of plasma membrane | external side of plasma membrane | ER to Golgi transport vesicle membrane | membrane | transport vesicle membrane | endocytic vesicle membrane | clathrin-coated endocytic vesicle membrane | late endosome membrane | trans-Golgi network membrane | MHC class II protein complex | extra…	Q95IE2	0	133
439	lcl|114372	42	0	CLCN3	H(+)/Cl(-) exchange transporter 3 (Fragment)	H(+)/Cl(-) exchange transporter 3 (Fragment) CLCN3	voltage-gated chloride channel activity | chloride channel activity | protein binding | ATP binding | antiporter activity | PDZ domain binding | protein homodimerization activity | protein heterodimerization activity |	transport | regulation of pH | ion transmembrane transport | regulation of anion transport | endosomal lumen acidification | transmembrane transport | chloride transmembrane transport |	Golgi membrane | early endosome | late endosome | Golgi apparatus | cell surface | vesicle membrane | integral component of membrane | apical plasma membrane | transport vesicle membrane | early endosome membrane | late endosome membrane |	D6RIX3	0	42
440	lcl|107609	91	0	HLA-B	MHC class I antigen (Fragment)	MHC class I antigen (Fragment) HLA-B	receptor binding | receptor binding | peptide antigen binding | peptide antigen binding | peptide antigen binding | TAP binding | TAP binding |	positive regulation of T cell mediated cytotoxicity | positive regulation of T cell mediated cytotoxicity | antigen processing and presentation of peptide antigen via MHC class I | antigen processing and presentation of peptide antigen via MHC class I | antigen processing and presentation of exogenous peptide antigen via MHC class I, TAP-dependent | antigen processing and presentation of exogenou…	Golgi membrane | plasma membrane | integral component of plasma membrane | cell surface | cell surface | ER to Golgi transport vesicle membrane | membrane | integral component of membrane | phagocytic vesicle membrane | early endosome membrane | MHC class I protein complex | MHC class I protein complex | extracellular vesicular exosome | integral component of lumenal side of endoplasmic reticulum…	M4N6M7	0	91
441	lcl|79743	599	0	SLCO1C1	solute carrier organic anion transporter family member 1C1 isoform 3	solute carrier organic anion transporter family member 1C1 isoform 3 SLCO1C1	transporter activity |	sodium-independent organic anion transport | transmembrane transport |	plasma membrane | integral component of membrane |	225543116	2	597
442	lcl|14862	111	0	NPAS2	Neuronal PAS domain-containing protein 2 (Fragment)	Neuronal PAS domain-containing protein 2 (Fragment) NPAS2	DNA binding | sequence-specific DNA binding transcription factor activity | signal transducer activity | protein binding | protein dimerization activity | Hsp90 protein binding |	transcription, DNA-templated | central nervous system development | circadian sleep/wake cycle | cellular lipid metabolic process | small molecule metabolic process | locomotor rhythm | positive regulation of transcription from RNA polymerase II promoter |	nucleus | transcription factor complex | cytosol |	H7C0J4	0	111
443	lcl|11258	1084	0	PHTF1	Putative homeodomain transcription factor 1	Putative homeodomain transcription factor 1 PHTF1	DNA binding | sequence-specific DNA binding transcription factor activity |	transcription, DNA-templated |	nucleus | endoplasmic reticulum | cis-Golgi network |	Q9UMS5 530361623 530361625 166197666	6	1078
444	lcl|36421	471	0		cDNA FLJ56290, highly similar to DNA excision repair protein ERCC-8	cDNA FLJ56290, highly similar to DNA excision repair protein ERCC-8				B4E383	12	459
445	lcl|50752	792	0	PPM1H	Protein phosphatase 1H	Protein phosphatase 1H PPM1H	phosphoprotein phosphatase activity |			Q9ULR3 149944715	8	784
446	lcl|87377	349	0	PEX19	Peroxisomal biogenesis factor 19 (Fragment)	Peroxisomal biogenesis factor 19 (Fragment) PEX19	protein binding | peroxisome membrane class-1 targeting sequence binding | protein N-terminus binding | ATPase binding |	protein targeting to peroxisome | protein targeting to peroxisome | peroxisome organization | peroxisome organization | peroxisome membrane biogenesis | peroxisome fission | protein import into peroxisome membrane | protein stabilization | transmembrane transport | chaperone-mediated protein folding | chaperone-mediated protein transport | establishment of protein localization to peroxisome | neg…	nucleus | cytoplasm | cytoplasm | cytoplasm | peroxisome | peroxisome | peroxisomal membrane | cytosol | cytosol | integral component of membrane | brush border membrane | protein complex |	Q5QNY5	12	337
447	lcl|109432	34	0	HLA-DRB1	MHC class II antigen (Fragment)	MHC class II antigen (Fragment) HLA-DRB1	MHC class II protein complex binding | MHC class II receptor activity | MHC class II receptor activity | peptide antigen binding |	immunoglobulin production involved in immunoglobulin mediated immune response | immunoglobulin production involved in immunoglobulin mediated immune response | inflammatory response to antigenic stimulus | humoral immune response mediated by circulating immunoglobulin | humoral immune response mediated by circulating immunoglobulin | immune response | immune response | detection of bacterium | cy…	Golgi membrane | lysosomal membrane | lysosomal membrane | plasma membrane | integral component of plasma membrane | external side of plasma membrane | ER to Golgi transport vesicle membrane | membrane | transport vesicle membrane | endocytic vesicle membrane | clathrin-coated endocytic vesicle membrane | late endosome membrane | trans-Golgi network membrane | MHC class II protein complex | extra…	N0A2S4	0	34
448	lcl|64159	879	0	N4BP1	NEDD4-binding protein 1	NEDD4-binding protein 1 N4BP1	protein binding |	negative regulation of protein ubiquitination | negative regulation of proteasomal ubiquitin-dependent protein catabolic process | cellular response to UV |	nucleolus | PML body |	O75113 48928019	18	861
449	lcl|73757	1871	0	MUC2	Mucin-2	Mucin-2 MUC2	protein binding |	O-glycan processing | maintenance of gastrointestinal epithelium | post-translational protein modification | cellular protein metabolic process |	Golgi lumen | inner mucus layer | outer mucus layer |	Q02817	10	1861
450	lcl|37630	373	0	ATF4	ATF4 protein (Fragment)	ATF4 protein (Fragment) ATF4	DNA binding | DNA binding | sequence-specific DNA binding transcription factor activity | sequence-specific DNA binding transcription factor activity | protein binding | protein C-terminus binding | sequence-specific DNA binding |	gluconeogenesis | regulation of transcription, DNA-templated | transcription from RNA polymerase II promoter | cellular amino acid metabolic process | activation of signaling protein activity involved in unfolded protein response | gamma-aminobutyric acid signaling pathway | endoplasmic reticulum unfolded protein response | response to endoplasmic reticulum stress | negative regulation of potassi…	nucleus | nucleus | nucleoplasm | transcription factor complex | cytoplasm | microtubule organizing center | dendrite membrane |	Q6ICP0	4	369
451	lcl|130401	426	0	MPP1	55 kDa erythrocyte membrane protein (Fragment)	55 kDa erythrocyte membrane protein (Fragment) MPP1	guanylate kinase activity | protein binding |	signal transduction | nucleotide phosphorylation | regulation of neutrophil chemotaxis |	intracellular | integral component of plasma membrane | membrane | cortical cytoskeleton | stereocilium |	C9J9J4	18	408
452	lcl|143359	273	0	SPA17	Sperm surface protein Sp17	Sperm surface protein Sp17 SPA17		epithelial cilium movement | spermatogenesis | single fertilization | binding of sperm to zona pellucida |	cytoplasm | membrane | motile cilium | primary cilium |	Q15506 8394343	0	273
453	lcl|151166	313	0	KERA	Keratocan	Keratocan KERA	molecular_function |	carbohydrate metabolic process | visual perception | keratan sulfate biosynthetic process | glycosaminoglycan metabolic process | keratan sulfate metabolic process | keratan sulfate catabolic process | small molecule metabolic process | response to stimulus | cornea development in camera-type eye |	extracellular region | proteinaceous extracellular matrix | Golgi lumen | lysosomal lumen |	O60938 5901992	4	309
454	lcl|151693	1009	0	MAN2C1	alpha-mannosidase 2C1 isoform 2	alpha-mannosidase 2C1 isoform 2 MAN2C1	alpha-mannosidase activity | zinc ion binding | carbohydrate binding |	mannose metabolic process |		374532775	16	993
455	lcl|151717	891	0	ST3GAL3	CMP-N-acetylneuraminate-beta-1,4-galactoside alpha-2,3-sialyltransferase isoform a	CMP-N-acetylneuraminate-beta-1,4-galactoside alpha-2,3-sialyltransferase isoform a ST3GAL3	beta-galactoside (CMP) alpha-2,3-sialyltransferase activity | N-acetyllactosaminide alpha-2,3-sialyltransferase activity |	carbohydrate metabolic process | O-glycan processing | keratan sulfate biosynthetic process | glycosaminoglycan metabolic process | keratan sulfate metabolic process | post-translational protein modification | cellular protein metabolic process | small molecule metabolic process | sialylation |	Golgi membrane | extracellular region | integral component of Golgi membrane | Golgi cisterna membrane |	284055255	6	885
456	lcl|67796	1067	0	COLQ	Acetylcholinesterase collagenic tail peptide (Fragment)	Acetylcholinesterase collagenic tail peptide (Fragment) COLQ	protein binding |	acetylcholine catabolic process in synaptic cleft | asymmetric protein localization |	collagen | basal lamina | extracellular space | cell junction | synapse |	S4R408	16	1051
457	lcl|148082	207	0	UROS	Uroporphyrinogen-III synthase (Fragment)	Uroporphyrinogen-III synthase (Fragment) UROS	uroporphyrinogen-III synthase activity | cofactor binding |	porphyrin-containing compound metabolic process | uroporphyrinogen III biosynthetic process | protoporphyrinogen IX biosynthetic process | heme biosynthetic process | heme biosynthetic process | heme biosynthetic process | small molecule metabolic process | response to antibiotic | cellular response to arsenic-containing substance | cellular response to amine stimulus |	mitochondrion | cytosol | cytosol |	Q5T3L9	8	199
458	lcl|133064	175	0	HLA-C	MHC class I antigen (Fragment)	MHC class I antigen (Fragment) HLA-C	receptor binding | peptide antigen binding | peptide antigen binding | peptide antigen binding | TAP binding |	positive regulation of T cell mediated cytotoxicity | antigen processing and presentation of peptide antigen via MHC class I | antigen processing and presentation of exogenous peptide antigen via MHC class I, TAP-dependent | antigen processing and presentation of exogenous peptide antigen via MHC class I, TAP-independent | antigen processing and presentation of endogenous peptide antigen via MHC …	Golgi membrane | extracellular region | plasma membrane | integral component of plasma membrane | cell surface | cell surface | ER to Golgi transport vesicle membrane | phagocytic vesicle membrane | early endosome membrane | MHC class I protein complex | MHC class I protein complex | extracellular vesicular exosome | integral component of lumenal side of endoplasmic reticulum membrane |	M9PAF8	4	171
459	lcl|114207	1045	0	ADD1	alpha-adducin isoform c	alpha-adducin isoform c ADD1	actin binding | structural molecule activity | calmodulin binding | transcription factor binding | spectrin binding | T cell receptor binding | protein homodimerization activity | poly(A) RNA binding | protein heterodimerization activity | actin filament binding |	cell morphogenesis | in utero embryonic development | cell volume homeostasis | apoptotic process | cellular component disassembly involved in execution phase of apoptosis | activation of signaling protein activity involved in unfolded protein response | hemoglobin metabolic process | actin cytoskeleton organization | erythrocyte differentiation | endoplasmic reticulum unfolded protein response |…	nucleus | cytosol | F-actin capping protein complex | postsynaptic density | dendritic spine | perinuclear region of cytoplasm |	29826323	14	1031
460	lcl|81916	698	0		cDNA FLJ77763, highly similar to Homo sapiens prolactin regulatory element binding (PREB), mRNA	cDNA FLJ77763, highly similar to Homo sapiens prolactin regulatory element binding (PREB), mRNA				A8K813	28	670
461	lcl|38731	147	0	TUBA1A	Tubulin alpha-1A chain (Fragment)	Tubulin alpha-1A chain (Fragment) TUBA1A	GTPase activity | structural molecule activity | structural constituent of cytoskeleton | protein binding | GTP binding | protein domain specific binding |	G2/M transition of mitotic cell cycle | mitotic cell cycle | protein folding | microtubule-based process | cytoskeleton-dependent intracellular transport | cellular protein metabolic process | 'de novo' posttranslational protein folding | protein polymerization | cell division |	nucleus | cytosol | microtubule | microtubule | cytoplasmic microtubule | extracellular vesicular exosome |	F8VRZ4	4	143
462	lcl|16797	287	0		cDNA FLJ54321, highly similar to MAM domain-containing protein 2	cDNA FLJ54321, highly similar to MAM domain-containing protein 2				B4E1Y9	0	287
463	lcl|56198	122	0	HLA-A	MHC class I antigen (Fragment)	MHC class I antigen (Fragment) HLA-A	receptor binding | receptor binding | protein binding | peptide antigen binding | peptide antigen binding | peptide antigen binding | poly(A) RNA binding | TAP binding |	positive regulation of T cell mediated cytotoxicity | positive regulation of T cell mediated cytotoxicity | antigen processing and presentation of peptide antigen via MHC class I | antigen processing and presentation of exogenous peptide antigen via MHC class I, TAP-dependent | antigen processing and presentation of exogenous peptide antigen via MHC class I, TAP-independent | antigen processing a…	Golgi membrane | plasma membrane | integral component of plasma membrane | cell surface | ER to Golgi transport vesicle membrane | phagocytic vesicle membrane | early endosome membrane | MHC class I protein complex | MHC class I protein complex | extracellular vesicular exosome | integral component of lumenal side of endoplasmic reticulum membrane |	K7P5I9	0	122
464	lcl|50313	124	0	HLA-B	MHC class I antigen (Fragment)	MHC class I antigen (Fragment) HLA-B	receptor binding | receptor binding | peptide antigen binding | peptide antigen binding | peptide antigen binding | TAP binding | TAP binding |	positive regulation of T cell mediated cytotoxicity | positive regulation of T cell mediated cytotoxicity | antigen processing and presentation of peptide antigen via MHC class I | antigen processing and presentation of peptide antigen via MHC class I | antigen processing and presentation of exogenous peptide antigen via MHC class I, TAP-dependent | antigen processing and presentation of exogenou…	Golgi membrane | plasma membrane | integral component of plasma membrane | cell surface | cell surface | ER to Golgi transport vesicle membrane | membrane | integral component of membrane | phagocytic vesicle membrane | early endosome membrane | MHC class I protein complex | MHC class I protein complex | extracellular vesicular exosome | integral component of lumenal side of endoplasmic reticulum…	E2DH98	0	124
465	lcl|71499	326	0	UCK1	PREDICTED: uridine-cytidine kinase 1 isoform X2	PREDICTED: uridine-cytidine kinase 1 isoform X2 UCK1	uridine kinase activity | ATP binding | phosphotransferase activity, alcohol group as acceptor | nucleoside kinase activity |	pyrimidine nucleobase metabolic process | pyrimidine nucleoside salvage | UMP salvage | CTP salvage | small molecule metabolic process | nucleobase-containing small molecule metabolic process |	cytosol |	530427236	0	326
466	lcl|108277	135	0	MC1R	Melanocortin 1 receptor	Melanocortin 1 receptor MC1R	melanocortin receptor activity | melanocyte-stimulating hormone receptor activity | protein binding | G-protein coupled peptide receptor activity | ubiquitin protein ligase binding |	G-protein coupled receptor signaling pathway, coupled to cyclic nucleotide second messenger | multicellular organismal development | UV protection | positive regulation of protein kinase A signaling | sensory perception of pain | positive regulation of cAMP biosynthetic process | negative regulation of tumor necrosis factor production | intracellular signal transduction | melanin biosynthetic pro…	plasma membrane | plasma membrane | integral component of plasma membrane |	V9QCQ4	0	135
467	lcl|50797	19	0		P53 (Fragment)	P53 (Fragment)				Q4FEW1	0	19
468	lcl|24593	661	0	MAEA	PREDICTED: macrophage erythroblast attacher isoform X5	PREDICTED: macrophage erythroblast attacher isoform X5 MAEA	actin binding |	cytoskeleton organization | cell cycle | cell adhesion | regulation of mitotic cell cycle | negative regulation of myeloid cell apoptotic process | erythrocyte maturation | enucleate erythrocyte development | cell division |	spindle | actomyosin contractile ring | cytoskeleton | integral component of plasma membrane | nuclear matrix |	530427290	12	649
469	lcl|131016	1212	0		cDNA FLJ40845 fis, clone TRACH2014483, highly similar to Zinc finger protein 682	cDNA FLJ40845 fis, clone TRACH2014483, highly similar to Zinc finger protein 682				B3KUX2	6	1206
470	lcl|3424	763	0	NPIPB6	PREDICTED: nuclear pore complex-interacting protein family member B6 isoform X9	PREDICTED: nuclear pore complex-interacting protein family member B6 isoform X9 NPIPB6				578828643	12	751
471	lcl|149607	589	0	HSF1	Heat shock factor protein 1	Heat shock factor protein 1 HSF1	RNA polymerase II intronic transcription regulatory region sequence-specific DNA binding | chromatin binding | sequence-specific DNA binding transcription factor activity | protein binding |	embryonic placenta development | transcription, DNA-templated | protein phosphorylation | defense response | female meiosis | spermatogenesis | negative regulation of cell proliferation | response to lipopolysaccharide | negative regulation of tumor necrosis factor production | cellular response to heat | positive regulation of multicellular organism growth | positive regulation of transcription …	protein complex | pronucleus |	Q00613 5031767	18	571
472	lcl|77635	398	0	SLC1A6	Excitatory amino acid transporter 4	Excitatory amino acid transporter 4 SLC1A6	L-glutamate transmembrane transporter activity | L-aspartate transmembrane transporter activity | sodium:dicarboxylate symporter activity |	ion transport | synaptic transmission | aspartate transport | L-glutamate transport | regulation of membrane potential | transmembrane transport |	Golgi apparatus | plasma membrane | integral component of plasma membrane | membrane |	Q8N753 442535523 442535521	12	386
473	lcl|2653	142	0	FKSG69	FKSG69	FKSG69 FKSG69				Q9BZ55	2	140
474	lcl|107917	94	0		Uncharacterized protein	Uncharacterized protein				G3V3R0	0	94
475	lcl|118350	219	0	HAUS8	HAUS augmin-like complex subunit 8	HAUS augmin-like complex subunit 8 HAUS8	molecular_function |	mitosis | spindle assembly | centrosome organization |	spindle pole | cytoplasm | centrosome | microtubule | HAUS complex |	M0R3B3	10	209
476	lcl|46080	419	0	ZFYVE27	PREDICTED: protrudin isoform X9	PREDICTED: protrudin isoform X9 ZFYVE27	protein binding | metal ion binding |	cell death | neuron projection development | neurotrophin TRK receptor signaling pathway | protein localization to plasma membrane |	endoplasmic reticulum | endoplasmic reticulum membrane | integral component of membrane | axon | dendrite | growth cone membrane | recycling endosome membrane |	530393025 530393027	10	409
477	lcl|98158	817	0		cDNA FLJ55358, highly similar to Mitogen-activated protein kinase kinase kinase7 (EC 2.7.11.25)	cDNA FLJ55358, highly similar to Mitogen-activated protein kinase kinase kinase7 (EC 2.7.11.25)				B4DRH8	18	799
478	lcl|67547	100	0	ZNRF1	E3 ubiquitin-protein ligase ZNRF1 (Fragment)	E3 ubiquitin-protein ligase ZNRF1 (Fragment) ZNRF1	ubiquitin-protein ligase activity | protein binding | zinc ion binding |	proteasome-mediated ubiquitin-dependent protein catabolic process | protein K48-linked ubiquitination |	lysosome | endosome | cell junction | synaptic vesicle membrane |	H3BUF0	8	92
479	lcl|139353	297	0	DHRS4L2	Dehydrogenase/reductase (SDR family) member 4 like 2A	Dehydrogenase/reductase (SDR family) member 4 like 2A DHRS4L2	oxidoreductase activity |		extracellular region |	D5KJA2	12	285
480	lcl|16304	196	0	SLC25A17	Peroxisomal membrane protein PMP34	Peroxisomal membrane protein PMP34 SLC25A17	ATP transmembrane transporter activity | protein binding | ADP transmembrane transporter activity | coenzyme A transmembrane transporter activity | FAD transmembrane transporter activity | FMN transmembrane transporter activity | chaperone binding | NAD transporter activity | AMP transmembrane transporter activity |	fatty acid alpha-oxidation | fatty acid beta-oxidation | ADP transport | ATP transport | fatty acid transport | coenzyme A transmembrane transport | FAD transmembrane transport | NAD transport | cellular lipid metabolic process | small molecule metabolic process | AMP transport | nucleotide transmembrane transport |	mitochondrion | peroxisome | peroxisomal membrane | peroxisomal membrane | integral component of peroxisomal membrane |	F8WE74	0	196
481	lcl|107132	389	0	LOC389895	uncharacterized protein LOC389895	uncharacterized protein LOC389895 LOC389895				409104116	6	383
482	lcl|124240	165	0		HLA-E gene exon 2 (Fragment)	HLA-E gene exon 2 (Fragment)				Q9TNU8	0	165
483	lcl|116927	54	0	ITPR2	Inositol 1,4,5-trisphosphate receptor type 2	Inositol 1,4,5-trisphosphate receptor type 2 ITPR2	inositol 1,4,5-trisphosphate-sensitive calcium-release channel activity | calcium ion transmembrane transporter activity | phosphatidylinositol binding |	response to hypoxia | energy reserve metabolic process | transport | signal transduction | epidermal growth factor receptor signaling pathway | activation of phospholipase C activity | blood coagulation | fibroblast growth factor receptor signaling pathway | platelet activation | Fc-epsilon receptor signaling pathway | Fc-gamma receptor signaling pathway involved in phagocytosis | small molecule …	endoplasmic reticulum membrane | plasma membrane | cell cortex | integral component of membrane | platelet dense tubular network membrane | sarcoplasmic reticulum membrane | receptor complex |	F5GYT5	0	54
484	lcl|35186	691	0	ACVR1C	activin receptor type-1C isoform 3 precursor	activin receptor type-1C isoform 3 precursor ACVR1C	transforming growth factor beta-activated receptor activity | ATP binding | activin receptor activity, type I | growth factor binding | nodal binding | metal ion binding |	response to dietary excess | protein phosphorylation | response to glucose | lipid storage | cell differentiation | apoptotic nuclear changes | response to insulin | nodal signaling pathway | positive regulation of cysteine-type endopeptidase activity involved in apoptotic process | negative regulation of insulin secretion | negative regulation of trophoblast cell migration | negative regulation …	plasma membrane | activin receptor complex |	161333837	6	685
485	lcl|92075	2220	0	DOPEY1	Protein dopey-1	Protein dopey-1 DOPEY1		protein transport |		Q5JWR5 578812541 34577118	42	2178
486	lcl|127659	8212	0	ANK3	Ankyrin-3	Ankyrin-3 ANK3	structural constituent of cytoskeleton | protein binding | cytoskeletal protein binding | spectrin binding | protein binding, bridging | ion channel binding | cadherin binding |	mitotic cytokinesis | plasma membrane organization | cytoskeletal anchoring at plasma membrane | signal transduction | axonogenesis | axon guidance | neuromuscular junction development | positive regulation of gene expression | positive regulation of cell communication by electrical coupling | positive regulation of sodium ion transport | neuronal action potential | positive regulation of homotyp…	lysosome | endoplasmic reticulum | Golgi apparatus | plasma membrane | tight junction | basal plasma membrane | cell surface | intercalated disc | spectrin-associated cytoskeleton | basolateral plasma membrane | lateral plasma membrane | sarcoplasmic reticulum | Z disc | T-tubule | dendrite | neuromuscular junction | node of Ranvier | paranode region of axon | sarcolemma | costamere | axon initia…	Q12955 32967601	101	8111
487	lcl|80664	1232	0	GPR146	PREDICTED: probable G-protein coupled receptor 146 isoform X1	PREDICTED: probable G-protein coupled receptor 146 isoform X1 GPR146	G-protein coupled receptor activity |		plasma membrane | integral component of membrane |	530384476	62	1170
488	lcl|103147	334	0	MTFR1L	Mitochondrial fission regulator 1-like	Mitochondrial fission regulator 1-like MTFR1L				Q9H019 153251766 153251748 153251745	0	334
489	lcl|21464	714	0		RNA-binding protein	RNA-binding protein				Q9Y6G0	10	704
490	lcl|81548	469	0	SHANK2	SH3 and multiple ankyrin repeat domains protein 2 (Fragment)	SH3 and multiple ankyrin repeat domains protein 2 (Fragment) SHANK2	protein binding | SH3 domain binding | GKAP/Homer scaffold activity | ionotropic glutamate receptor binding |	synapse assembly | learning | adult behavior | social behavior | long-term synaptic potentiation | long term synaptic depression | vocalization behavior |	photoreceptor outer segment | photoreceptor inner segment | cellular_component | neurofilament | plasma membrane | ionotropic glutamate receptor complex | postsynaptic density | apical plasma membrane | cell junction | growth cone | brush border membrane | neuron projection | neuronal cell body | dendritic spine | postsynaptic membrane | ciliary membrane |	H7C027	94	375
491	lcl|77457	442	0	ACTBL2	Beta-actin-like protein 2	Beta-actin-like protein 2 ACTBL2	molecular_function | ATP binding |	biological_process |	extracellular space | cytoplasm | cytoskeleton | extracellular vesicular exosome |	Q562R1 63055057	52	390
492	lcl|31611	686	0	POTEB	POTE ankyrin domain family member B	POTE ankyrin domain family member B POTEB				Q495V5	16	670
493	lcl|20240	369	0	HLA-B	MHC class I antigen (Fragment)	MHC class I antigen (Fragment) HLA-B	receptor binding | receptor binding | peptide antigen binding | peptide antigen binding | peptide antigen binding | TAP binding | TAP binding |	positive regulation of T cell mediated cytotoxicity | positive regulation of T cell mediated cytotoxicity | antigen processing and presentation of peptide antigen via MHC class I | antigen processing and presentation of peptide antigen via MHC class I | antigen processing and presentation of exogenous peptide antigen via MHC class I, TAP-dependent | antigen processing and presentation of exogenou…	Golgi membrane | plasma membrane | integral component of plasma membrane | cell surface | cell surface | ER to Golgi transport vesicle membrane | membrane | integral component of membrane | phagocytic vesicle membrane | early endosome membrane | MHC class I protein complex | MHC class I protein complex | extracellular vesicular exosome | integral component of lumenal side of endoplasmic reticulum…	J7S4C5	0	369
494	lcl|20918	343	0	C1orf159	PREDICTED: uncharacterized protein C1orf159 isoform X10	PREDICTED: uncharacterized protein C1orf159 isoform X10 C1orf159			integral component of membrane |	578799332	4	339
495	lcl|110361	332	0	PSMB8	Proteasome subunit beta type-8	Proteasome subunit beta type-8 PSMB8	threonine-type endopeptidase activity | protein binding |	G1/S transition of mitotic cell cycle | protein polyubiquitination | mitotic cell cycle | antigen processing and presentation of peptide antigen via MHC class I | antigen processing and presentation of exogenous peptide antigen via MHC class I, TAP-dependent | regulation of cellular amino acid metabolic process | apoptotic process | DNA damage response, signal transduction by p53 class mediator r…	proteasome complex | nucleoplasm | cytosol | proteasome core complex | extracellular vesicular exosome | spermatoproteasome complex |	P28062 73747875	12	320
496	lcl|107627	37	0	UBE2B	Ubiquitin-conjugating enzyme E2 B	Ubiquitin-conjugating enzyme E2 B UBE2B	ubiquitin-protein ligase activity | ubiquitin-protein ligase activity | protein binding | ATP binding | ubiquitin protein ligase binding |	protein polyubiquitination | response to hypoxia | in utero embryonic development | DNA repair | postreplication repair | postreplication repair | maintenance of chromatin silencing | ubiquitin-dependent protein catabolic process | ubiquitin-dependent protein catabolic process | protein monoubiquitination | cellular response to DNA damage stimulus | spermatogenesis | sperm axoneme assembly | resp…	chromatin | nuclear chromatin | XY body | nucleus | replication fork | cytoplasm | plasma membrane | HULC complex |	D6RDW8	0	37
497	lcl|123805	151	0	HLA-B	MHC class I antigen (Fragment)	MHC class I antigen (Fragment) HLA-B	receptor binding | receptor binding | peptide antigen binding | peptide antigen binding | peptide antigen binding | TAP binding | TAP binding |	positive regulation of T cell mediated cytotoxicity | positive regulation of T cell mediated cytotoxicity | antigen processing and presentation of peptide antigen via MHC class I | antigen processing and presentation of peptide antigen via MHC class I | antigen processing and presentation of exogenous peptide antigen via MHC class I, TAP-dependent | antigen processing and presentation of exogenou…	Golgi membrane | plasma membrane | integral component of plasma membrane | cell surface | cell surface | ER to Golgi transport vesicle membrane | membrane | integral component of membrane | phagocytic vesicle membrane | early endosome membrane | MHC class I protein complex | MHC class I protein complex | extracellular vesicular exosome | integral component of lumenal side of endoplasmic reticulum…	F4YU47	0	151
498	lcl|113599	450	0		cDNA FLJ32792 fis, clone TESTI2002369	cDNA FLJ32792 fis, clone TESTI2002369				Q96M65	0	450
499	lcl|11196	30	0	CYTB	Cytochrome b	Cytochrome b CYTB				V9J6G3	4	26
500	lcl|52296	35	0	RBM3	Putative RNA-binding protein 3	Putative RNA-binding protein 3 RBM3	nucleotide binding | RNA binding | protein binding | ribosomal large subunit binding | poly(A) RNA binding |	RNA processing | translation | regulation of translation | response to cold | production of miRNAs involved in gene silencing by miRNA | positive regulation of translation |	nucleus | cytoplasm | large ribosomal subunit | dendrite |	F5GZ81	0	35
501	lcl|42907	810	0		cDNA FLJ52608	cDNA FLJ52608				B4DXE9	6	804
502	lcl|152166	1657	0	CORO7-PAM16	CORO7-PAM16 protein	CORO7-PAM16 protein CORO7-PAM16				319918873	14	1643
503	lcl|18313	284	0		cDNA, FLJ78883	cDNA, FLJ78883				B7Z9L9	2	282
504	lcl|88425	420	0	SLC6A17	Sodium-dependent neutral amino acid transporter SLC6A17	Sodium-dependent neutral amino acid transporter SLC6A17 SLC6A17	neurotransmitter:sodium symporter activity |	neutral amino acid transport | glycine transport | leucine transport | proline transport | alanine transport |	integral component of plasma membrane | synaptic vesicle | cell junction | synaptic vesicle membrane |	Q9H1V8 578799117 58219014	4	416
505	lcl|63023	265	0	RPS6KA2	Ribosomal protein S6 kinase alpha-2	Ribosomal protein S6 kinase alpha-2 RPS6KA2	magnesium ion binding | protein serine/threonine kinase activity | ribosomal protein S6 kinase activity | protein binding | ATP binding |	oocyte maturation | brain renin-angiotensin system | toll-like receptor signaling pathway | MyD88-dependent toll-like receptor signaling pathway | MyD88-independent toll-like receptor signaling pathway | signal transduction | synaptic transmission | axon guidance | heart development | negative regulation of cell proliferation | positive regulation of gene expression | cardiac muscle cell apoptoti…	nucleus | nucleoplasm | cytoplasm | spindle | cytosol |	Q5TI62	2	263
506	lcl|68840	180	0	TGFA	Protransforming growth factor alpha	Protransforming growth factor alpha TGFA	glycoprotein binding | MAP kinase kinase activity | epidermal growth factor receptor binding | protein binding | growth factor activity |	MAPK cascade | activation of MAPK activity | angiogenesis | epidermal growth factor receptor signaling pathway | cell proliferation | wound healing | response to drug | negative regulation of apoptotic process | positive regulation of epidermal growth factor-activated receptor activity | positive regulation of mitosis | positive regulation of epithelial cell proliferation | positive regulation of…	extracellular space | nucleus | plasma membrane | cell surface | integral component of membrane | basolateral plasma membrane | cytoplasmic vesicle | perinuclear region of cytoplasm |	P01135 4507461	4	176
507	lcl|82992	997	0	PLA2G4E	Cytosolic phospholipase A2 epsilon	Cytosolic phospholipase A2 epsilon PLA2G4E	phospholipase A2 activity | metal ion binding |	phospholipid metabolic process | phospholipid catabolic process | phosphatidylinositol acyl-chain remodeling | phosphatidylserine acyl-chain remodeling | phosphatidylcholine acyl-chain remodeling | phosphatidylethanolamine acyl-chain remodeling | small molecule metabolic process | glycerophospholipid biosynthetic process |	lysosomal membrane | cytosol |	C9JK77	0	997
508	lcl|94188	2926	0	PARD3	PREDICTED: partitioning defective 3 homolog isoform X2	PREDICTED: partitioning defective 3 homolog isoform X2 PARD3	protein kinase C binding | protein binding | phosphatidylinositol-4,5-bisphosphate binding | phosphatidylinositol-3,4,5-trisphosphate binding | protein phosphatase binding | phosphatidylinositol-3-phosphate binding |	microtubule cytoskeleton organization | apical constriction | protein complex assembly | protein targeting to membrane | cell cycle | establishment or maintenance of cell polarity | transforming growth factor beta receptor signaling pathway | protein kinase C-activating G-protein coupled receptor signaling pathway | axonogenesis | asymmetric cell division | regulation of actin filament-based proc…	spindle | cytosol | plasma membrane | cell-cell junction | cell-cell junction | cell-cell adherens junction | tight junction | tight junction | cell cortex | endomembrane system | cell junction | neuronal cell body | axonal growth cone | apical part of cell |	530392315	42	2884
509	lcl|34956	638	0		cDNA FLJ76860, highly similar to Homo sapiens egf-like module containing, mucin-like, hormone receptor-like 1, mRNA	cDNA FLJ76860, highly similar to Homo sapiens egf-like module containing, mucin-like, hormone receptor-like 1, mRNA				A8K653	10	628
510	lcl|38313	142	0	ZNF628	Zinc finger protein 628 (Fragment)	Zinc finger protein 628 (Fragment) ZNF628	DNA binding | sequence-specific DNA binding transcription factor activity | metal ion binding |	transcription, DNA-templated |	nucleus |	K7EL41	0	142
511	lcl|87700	57	0		Coagulation factor VII (Fragment)	Coagulation factor VII (Fragment)				Q6TDG2	0	57
512	lcl|73918	168	0	MED15	Mediator of RNA polymerase II transcription subunit 15 (Fragment)	Mediator of RNA polymerase II transcription subunit 15 (Fragment) MED15	RNA polymerase II transcription cofactor activity | protein binding |	transcription initiation from RNA polymerase II promoter | gene expression | stem cell maintenance |	nucleoplasm | cytoplasm | mediator complex |	H7C308	0	168
513	lcl|111213	78	0		Rheumatoid factor RF-ET13 (Fragment)	Rheumatoid factor RF-ET13 (Fragment)				O43234	4	74
514	lcl|19273	1807	0	USP53	PREDICTED: inactive ubiquitin carboxyl-terminal hydrolase 53 isoform X3	PREDICTED: inactive ubiquitin carboxyl-terminal hydrolase 53 isoform X3 USP53	ubiquitin thiolesterase activity |	ubiquitin-dependent protein catabolic process | biological_process |	cellular_component |	530377854	20	1787
515	lcl|131811	849	0	RHOBTB2	PREDICTED: rho-related BTB domain-containing protein 2 isoform X1	PREDICTED: rho-related BTB domain-containing protein 2 isoform X1 RHOBTB2	GTP binding |	small GTPase mediated signal transduction | regulation of small GTPase mediated signal transduction |	cytosol | plasma membrane |	578815255 237649109	8	841
516	lcl|36880	273	0	DNAJC25-GNG10	DNAJC25-GNG10 protein precursor	DNAJC25-GNG10 protein precursor DNAJC25-GNG10				21361097	8	265
517	lcl|102748	275	0	WRAP53	Telomerase Cajal body protein 1	Telomerase Cajal body protein 1 WRAP53	RNA binding | protein binding |	telomere formation via telomerase | positive regulation of telomerase activity |	telomerase holoenzyme complex | Cajal body |	Q9BUR4 221136862 221136866 221136854 221136858	10	265
518	lcl|56497	2795	0		cDNA FLJ60400, highly similar to Homo sapiens rhomboid family 1 (Drosophila) (RHBDF1), mRNA	cDNA FLJ60400, highly similar to Homo sapiens rhomboid family 1 (Drosophila) (RHBDF1), mRNA				B4E3N5	377	2418
519	lcl|32857	3889	0	ZCCHC11	PREDICTED: terminal uridylyltransferase 4 isoform X1	PREDICTED: terminal uridylyltransferase 4 isoform X1 ZCCHC11	protein binding | zinc ion binding | poly(A) RNA binding | RNA uridylyltransferase activity |	cytokine production | miRNA metabolic process | miRNA catabolic process | stem cell maintenance | pre-miRNA processing | RNA 3'-end processing | regulation of lipopolysaccharide-mediated signaling pathway | negative regulation of NF-kappaB transcription factor activity | positive regulation of interleukin-6 production | interleukin-6-mediated signaling pathway | histone mRNA catabolic process |	extracellular space | cytoplasm | extracellular vesicular exosome |	530362232 578798743 578798745	50	3839
520	lcl|36007	128	0	VAMP2	Vesicle-associated membrane protein 2	Vesicle-associated membrane protein 2 VAMP2	SNAP receptor activity | protein binding | syntaxin binding |	energy reserve metabolic process | post-Golgi vesicle-mediated transport | vesicle fusion | synaptic transmission | neurotransmitter secretion | glutamate secretion | calcium ion-dependent exocytosis | regulation of exocytosis | cellular protein metabolic process | small molecule metabolic process | regulation of insulin secretion | membrane organization |	plasma membrane | integral component of plasma membrane | synaptic vesicle | membrane | cell junction | clathrin-coated vesicle | endocytic vesicle membrane | secretory granule membrane | synaptic vesicle membrane | SNARE complex | neuron projection | clathrin-sculpted glutamate transport vesicle membrane | clathrin-sculpted gamma-aminobutyric acid transport vesicle membrane | clathrin-sculpted m…	P63027 172072620	16	112
521	lcl|142169	224	0	POMZP3	POM121 and ZP3 fusion protein	POM121 and ZP3 fusion protein POMZP3	molecular_function |	biological_process |	cellular_component |	Q6PJE2 111160500	22	202
522	lcl|105628	765	0		cDNA FLJ35128 fis, clone PLACE6008768, moderately similar to Insulin-like growth factor-binding protein 3	cDNA FLJ35128 fis, clone PLACE6008768, moderately similar to Insulin-like growth factor-binding protein 3				B3KRZ1	20	745
523	lcl|53187	761	0	SERPINB7	serpin B7 isoform 2	serpin B7 isoform 2 SERPINB7	serine-type endopeptidase inhibitor activity |	negative regulation of endopeptidase activity | regulation of proteolysis | positive regulation of transforming growth factor beta1 production | positive regulation of collagen biosynthetic process | positive regulation of glomerular mesangial cell proliferation | positive regulation of platelet-derived growth factor production |	extracellular space | cytoplasm |	387912532	34	727
524	lcl|34596	265	0	PPFIA2	Liprin-alpha-2 (Fragment)	Liprin-alpha-2 (Fragment) PPFIA2	protein binding |	cell-matrix adhesion |	cytoplasm | cell surface | synapse | extracellular vesicular exosome |	F8VWR9	0	265
525	lcl|33751	56	0	HLA-DPA1	MHC class II antigen (Fragment)	MHC class II antigen (Fragment) HLA-DPA1	MHC class II receptor activity |	immune response | cytokine-mediated signaling pathway | antigen processing and presentation of exogenous peptide antigen via MHC class II | T cell costimulation | T cell receptor signaling pathway | interferon-gamma-mediated signaling pathway | cellular response to interferon-gamma |	Golgi membrane | lysosomal membrane | plasma membrane | integral component of plasma membrane | endosome membrane | ER to Golgi transport vesicle membrane | transport vesicle membrane | endocytic vesicle membrane | clathrin-coated endocytic vesicle membrane | trans-Golgi network membrane | MHC class II protein complex | integral component of lumenal side of endoplasmic reticulum membrane |	Q29ZN0 Q29ZN1 Q29ZN2 Q29ZN3 Q29ZN4	0	56
526	lcl|26800	351	0	TSPO	Putative peripheral benzodiazepine receptor-related protein (Fragment)	Putative peripheral benzodiazepine receptor-related protein (Fragment) TSPO	androgen binding | benzodiazepine receptor activity | cholesterol binding |	protein targeting to mitochondrion | steroid biosynthetic process | heme biosynthetic process | anion transport | chloride transport | apoptotic process | synaptic transmission | aging | steroid metabolic process | cell proliferation | glial cell migration | response to manganese ion | response to vitamin B1 | positive regulation of necrotic cell death | peripheral nervous system axon regeneratio…	mitochondrial outer membrane | integral component of membrane | extracellular vesicular exosome |	B1AH87	0	351
527	lcl|74258	200	0	GTF2H2C	General transcription factor IIH subunit 2	General transcription factor IIH subunit 2 GTF2H2C				D6RGC9	0	200
528	lcl|24313	950	0		DnaJ (Hsp40) homolog, subfamily B, member 4 variant (Fragment)	DnaJ (Hsp40) homolog, subfamily B, member 4 variant (Fragment)				Q59E89	12	938
529	lcl|149148	72	0	HLA-DRB1	MHC class II antigen (Fragment)	MHC class II antigen (Fragment) HLA-DRB1	MHC class II protein complex binding | MHC class II receptor activity | MHC class II receptor activity | peptide antigen binding |	immunoglobulin production involved in immunoglobulin mediated immune response | immunoglobulin production involved in immunoglobulin mediated immune response | inflammatory response to antigenic stimulus | humoral immune response mediated by circulating immunoglobulin | humoral immune response mediated by circulating immunoglobulin | immune response | immune response | detection of bacterium | cy…	Golgi membrane | lysosomal membrane | lysosomal membrane | plasma membrane | integral component of plasma membrane | external side of plasma membrane | ER to Golgi transport vesicle membrane | membrane | transport vesicle membrane | endocytic vesicle membrane | clathrin-coated endocytic vesicle membrane | late endosome membrane | trans-Golgi network membrane | MHC class II protein complex | extra…	C9WEV7	0	72
530	lcl|102979	5378	0	MGA	MAX gene-associated protein	MAX gene-associated protein MGA	DNA binding | sequence-specific DNA binding transcription factor activity | protein dimerization activity |	transcription, DNA-templated |	transcription factor complex | MLL1 complex |	Q8IWI9	38	5340
531	lcl|129150	1183	0		cDNA FLJ51473, highly similar to Junctophilin-2	cDNA FLJ51473, highly similar to Junctophilin-2				B4E3T9	26	1157
532	lcl|21908	1703	0	PPP1R12A	PREDICTED: protein phosphatase 1 regulatory subunit 12A isoform X7	PREDICTED: protein phosphatase 1 regulatory subunit 12A isoform X7 PPP1R12A	enzyme inhibitor activity | signal transducer activity | protein binding | phosphatase regulator activity | phosphatase regulator activity | protein kinase binding | 14-3-3 protein binding |	G2/M transition of mitotic cell cycle | mitotic cell cycle | protein dephosphorylation | mitosis | signal transduction | regulation of cell adhesion | regulation of myosin-light-chain-phosphatase activity | negative regulation of catalytic activity | positive regulation of transcription from RNA polymerase II promoter | regulation of nucleocytoplasmic transport | centrosome organization |	kinetochore | nucleoplasm | centrosome | contractile fiber | PTW/PP1 phosphatase complex |	530400287	16	1687
533	lcl|152633	526	0	SGK3	Serine/threonine-protein kinase Sgk3 (Fragment)	Serine/threonine-protein kinase Sgk3 (Fragment) SGK3				E5RHY6	16	510
534	lcl|78063	547	0	PABPC1L2A	Polyadenylate-binding protein 1-like 2	Polyadenylate-binding protein 1-like 2 PABPC1L2A				Q5JQF8 61175237 109948285	0	547
535	lcl|14679	215	0	KIF20A	Kinesin-like protein KIF20A (Fragment)	Kinesin-like protein KIF20A (Fragment) KIF20A	microtubule motor activity | transporter activity | ATP binding | microtubule binding | protein kinase binding |	mitotic cell cycle | cytokinesis | microtubule bundle formation | microtubule-based movement | protein transport | vesicle-mediated transport |	nucleoplasm | Golgi apparatus | spindle | kinesin complex | microtubule |	D6RBN1	0	215
536	lcl|33761	231	0	NDUFS8	PREDICTED: NADH dehydrogenase [ubiquinone] iron-sulfur protein 8, mitochondrial isoform X3	PREDICTED: NADH dehydrogenase [ubiquinone] iron-sulfur protein 8, mitochondrial isoform X3 NDUFS8	NADH dehydrogenase activity | NADH dehydrogenase (ubiquinone) activity | NADH dehydrogenase (ubiquinone) activity | metal ion binding | 4 iron, 4 sulfur cluster binding |	mitochondrial electron transport, NADH to ubiquinone | response to oxidative stress | respiratory electron transport chain | mitochondrial respiratory chain complex I assembly | cellular metabolic process | small molecule metabolic process |	mitochondrion | mitochondrial inner membrane | mitochondrial respiratory chain complex I | mitochondrial respiratory chain complex I | mitochondrial respiratory chain complex I |	530396822	4	227
537	lcl|17351	542	0	FGFRL1	Fibroblast growth factor receptor-like 1 (Fragment)	Fibroblast growth factor receptor-like 1 (Fragment) FGFRL1	fibroblast growth factor-activated receptor activity | heparin binding | fibroblast growth factor binding |	skeletal system development | heart valve morphogenesis | negative regulation of cell proliferation | fibroblast growth factor receptor signaling pathway | ventricular septum morphogenesis | diaphragm development |	plasma membrane | integral component of membrane |	D6REM7	4	538
538	lcl|34789	831	0	SNAP47	Synaptosomal-associated protein 47 (Fragment)	Synaptosomal-associated protein 47 (Fragment) SNAP47	protein binding |		endomembrane system | membrane | BLOC-1 complex | perinuclear region of cytoplasm |	H7C3C7	18	813
539	lcl|137308	152	0	COX7A2L	Cytochrome c oxidase subunit 7A-related protein, mitochondrial	Cytochrome c oxidase subunit 7A-related protein, mitochondrial COX7A2L	cytochrome-c oxidase activity |	respiratory electron transport chain | cellular metabolic process | small molecule metabolic process | hydrogen ion transmembrane transport |	mitochondrial inner membrane | mitochondrial respiratory chain |	O14548 Q6FGA0 18105037	0	152
540	lcl|81228	155	0	MUC15	Mucin-15	Mucin-15 MUC15		O-glycan processing | post-translational protein modification | cellular protein metabolic process |	extracellular region | Golgi lumen | plasma membrane | integral component of membrane |	Q8N387 40255098	0	155
541	lcl|9375	255	0	DCAF17	DDB1- and CUL4-associated factor 17 (Fragment)	DDB1- and CUL4-associated factor 17 (Fragment) DCAF17		protein ubiquitination | protein ubiquitination |	nucleolus | integral component of membrane | Cul4-RING ubiquitin ligase complex |	H7C1H3	0	255
542	lcl|30557	3381	0	PHLDB1	PREDICTED: pleckstrin homology-like domain family B member 1 isoform X5	PREDICTED: pleckstrin homology-like domain family B member 1 isoform X5 PHLDB1				530397921	74	3307
543	lcl|145062	1194	0	PITPNM3	PITPNM family member 3	PITPNM family member 3 PITPNM3	calcium ion binding | protein binding | lipid binding | phosphatidylinositol transporter activity | receptor tyrosine kinase binding |	phospholipid transport | phosphatidylinositol metabolic process |	intracellular | endomembrane system | integral component of membrane |	A1A5C9	20	1174
544	lcl|37305	636	0	AMN	Protein amnionless	Protein amnionless AMN	receptor binding |	vitamin metabolic process | water-soluble vitamin metabolic process | receptor-mediated endocytosis | multicellular organismal development | excretion | cobalamin metabolic process | cobalamin transport | lipoprotein metabolic process | Golgi to plasma membrane protein transport | small molecule metabolic process |	extracellular space | plasma membrane | endosome membrane | integral component of membrane | apical plasma membrane | endocytic vesicle | extracellular vesicular exosome |	Q9BXJ7 110611172	27	609
545	lcl|12749	515	0	ZDHHC15	Palmitoyltransferase ZDHHC15	Palmitoyltransferase ZDHHC15 ZDHHC15	zinc ion binding | palmitoyltransferase activity | protein-cysteine S-palmitoyltransferase activity |	synaptic vesicle maturation | protein palmitoylation | establishment of protein localization |	Golgi apparatus | integral component of membrane |	Q96MV8 578838305 21450653	4	511
546	lcl|98314	4	0	CYTB	Cytochrome b	Cytochrome b CYTB				V9J0T0	4	0
547	lcl|111381	897	0	STK32C	Serine/threonine-protein kinase 32C	Serine/threonine-protein kinase 32C STK32C	protein serine/threonine kinase activity | ATP binding | metal ion binding |			B7Z7J1	186	711
548	lcl|28725	1074	0	SLC23A1	PREDICTED: solute carrier family 23 member 1 isoform X3	PREDICTED: solute carrier family 23 member 1 isoform X3 SLC23A1	protein binding | L-ascorbate:sodium symporter activity | sodium ion transmembrane transporter activity | nucleobase transmembrane transporter activity | L-ascorbic acid transporter activity | dehydroascorbic acid transporter activity | sodium-dependent L-ascorbate transmembrane transporter activity |	nucleobase-containing compound metabolic process | vitamin metabolic process | water-soluble vitamin metabolic process | sodium ion transport | brain development | response to toxic substance | nucleobase transport | L-ascorbic acid transport | L-ascorbic acid metabolic process | lung development | vitamin transmembrane transport | sodium ion transmembrane transport | small molecule metabolic pro…	cytoplasm | plasma membrane | plasma membrane | integral component of plasma membrane | brush border | basal plasma membrane | membrane | apical plasma membrane | intracellular organelle | extracellular vesicular exosome |	578810693	16	1058
549	lcl|106514	857	0	VIT	Vitrin	Vitrin VIT	glycosaminoglycan binding |	positive regulation of cell-substrate adhesion | extracellular matrix organization |	interstitial matrix |	B5MD45	22	835
550	lcl|135014	925	0	CDH10	Cadherin-10	Cadherin-10 CDH10	calcium ion binding |	homophilic cell adhesion | single organismal cell-cell adhesion | cell junction assembly | adherens junction organization | cell-cell junction organization |	plasma membrane | integral component of membrane |	Q9Y6N8 16306530	16	909
551	lcl|90922	103	0	TCRBV7S1A1N2T	V_segment translation product (Fragment)	V_segment translation product (Fragment) TCRBV7S1A1N2T				A0A577	0	103
552	lcl|37609	604	0	ACSM2A	acyl-coenzyme A synthetase ACSM2A, mitochondrial	acyl-coenzyme A synthetase ACSM2A, mitochondrial ACSM2A	ATP binding | metal ion binding | butyrate-CoA ligase activity |	fatty acid metabolic process | medium-chain fatty-acyl-CoA metabolic process | glucose homeostasis | triglyceride homeostasis |	mitochondrion | mitochondrial matrix |	58082049	4	600
553	lcl|141672	23	0	PDPK1	3-phosphoinositide-dependent protein kinase 1 (Fragment)	3-phosphoinositide-dependent protein kinase 1 (Fragment) PDPK1	protein serine/threonine kinase activity | protein serine/threonine kinase activity | protein serine/threonine kinase activity | 3-phosphoinositide-dependent protein kinase activity | insulin receptor binding | protein binding | ATP binding | kinase activity | protein kinase binding |	type B pancreatic cell development | transcription, DNA-templated | regulation of transcription, DNA-templated | protein phosphorylation | negative regulation of protein kinase activity | hyperosmotic response | epidermal growth factor receptor signaling pathway | synaptic transmission | blood coagulation | insulin receptor signaling pathway | fibroblast growth factor receptor signaling pathway |…	nucleoplasm | cytoplasm | cytoplasm | cytosol | plasma membrane | plasma membrane | focal adhesion | membrane | cytoplasmic membrane-bounded vesicle |	H3BPR5	0	23
554	lcl|33833	267	0	APOC4	Apolipoprotein C-IV	Apolipoprotein C-IV APOC4	lipid transporter activity |	lipid metabolic process | positive regulation of sequestering of triglyceride | triglyceride homeostasis |	very-low-density lipoprotein particle | very-low-density lipoprotein particle | high-density lipoprotein particle |	A5YAK2	4	263
555	lcl|120825	617	0	RASSF1	ras association domain-containing protein 1 isoform B	ras association domain-containing protein 1 isoform B RASSF1	protein binding | zinc ion binding | identical protein binding | protein N-terminus binding |	cellular response to DNA damage stimulus | cell cycle arrest | Ras protein signal transduction | positive regulation of protein ubiquitination | protein stabilization | negative regulation of cell cycle arrest |	spindle pole | nucleus | microtubule organizing center | microtubule | microtubule cytoskeleton |	332701155 25777680	2	615
556	lcl|67942	391	0	FGB	Fibrinogen beta chain, isoform CRA_e	Fibrinogen beta chain, isoform CRA_e FGB	receptor binding | structural molecule activity | protein binding | protein binding, bridging | cell adhesion molecule binding | chaperone binding |	platelet degranulation | cell-matrix adhesion | signal transduction | blood coagulation | platelet activation | extracellular matrix organization | positive regulation of heterotypic cell-cell adhesion | cellular protein complex assembly | cellular response to leptin stimulus | positive regulation of vasoconstriction | positive regulation of exocytosis | positive regulation of protein secretion |…	extracellular region | extracellular region | fibrinogen complex | extracellular space | plasma membrane | cell cortex | external side of plasma membrane | cell surface | platelet alpha granule | platelet alpha granule lumen | blood microparticle |	D3DP13	6	385
557	lcl|3571	419	0	CCNH	Uncharacterized protein	Uncharacterized protein CCNH	protein binding | DNA-dependent ATPase activity | RNA polymerase II carboxy-terminal domain kinase activity | cyclin-dependent protein serine/threonine kinase regulator activity | protein kinase binding |	regulation of cyclin-dependent protein serine/threonine kinase activity | G1/S transition of mitotic cell cycle | G2/M transition of mitotic cell cycle | mitotic cell cycle | nucleotide-excision repair, DNA damage removal | ATP catabolic process | DNA repair | transcription-coupled nucleotide-excision repair | nucleotide-excision repair | transcription from RNA polymerase I promoter | transcripti…	nucleoplasm | holo TFIIH complex | cyclin-dependent protein kinase activating kinase holoenzyme complex | TFIIK complex |	D6RHI7	8	411
558	lcl|145922	59	0	ANAPC11	Anaphase-promoting complex subunit 11	Anaphase-promoting complex subunit 11 ANAPC11	ubiquitin-protein ligase activity | zinc ion binding |	mitotic cell cycle | mitosis | mitotic spindle assembly checkpoint | protein ubiquitination | anaphase-promoting complex-dependent proteasomal ubiquitin-dependent protein catabolic process | negative regulation of ubiquitin-protein ligase activity involved in mitotic cell cycle | positive regulation of ubiquitin-protein ligase activity involved in mitotic cell cycle | regulation of ubiquitin-prot…	nucleoplasm | anaphase-promoting complex | cytosol |	Q9NYG5 50409796 50409781 574957113 18777675 50409804 50409789 574957206 574957108 50409750 574957034	0	59
559	lcl|96072	55	0	TCRBV2S1	V_segment translation product (Fragment)	V_segment translation product (Fragment) TCRBV2S1				A0A5B4	4	51
560	lcl|128264	5	0	NAG20	NAG20 (Fragment)	NAG20 (Fragment) NAG20				Q9HD88	0	5
561	lcl|74014	715	0	ATP6V0A1	V-type proton ATPase 116 kDa subunit a isoform 1	V-type proton ATPase 116 kDa subunit a isoform 1 ATP6V0A1	protein binding | hydrogen ion transmembrane transporter activity | ATPase binding |	cellular iron ion homeostasis | insulin receptor signaling pathway | ATP hydrolysis coupled proton transport | transferrin transport | interaction with host | transmembrane transport | phagosome maturation |	vacuolar proton-transporting V-type ATPase, V0 domain | plasma membrane | endosome membrane | integral component of membrane | phagocytic vesicle membrane | melanosome | extracellular vesicular exosome |	B7Z641	8	707
562	lcl|78995	114	0	HLA-C	MHC class I antigen (Fragment)	MHC class I antigen (Fragment) HLA-C	receptor binding | peptide antigen binding | peptide antigen binding | peptide antigen binding | TAP binding |	positive regulation of T cell mediated cytotoxicity | antigen processing and presentation of peptide antigen via MHC class I | antigen processing and presentation of exogenous peptide antigen via MHC class I, TAP-dependent | antigen processing and presentation of exogenous peptide antigen via MHC class I, TAP-independent | antigen processing and presentation of endogenous peptide antigen via MHC …	Golgi membrane | extracellular region | plasma membrane | integral component of plasma membrane | cell surface | cell surface | ER to Golgi transport vesicle membrane | phagocytic vesicle membrane | early endosome membrane | MHC class I protein complex | MHC class I protein complex | extracellular vesicular exosome | integral component of lumenal side of endoplasmic reticulum membrane |	Q6RZA4 Q6T772	0	114
563	lcl|123626	87	0	HLA-Cw	MHC class I antigen	MHC class I antigen HLA-Cw				Q85ZX8	0	87
564	lcl|132876	41	0	ZNF207	Zinc finger protein 207 (Fragment)	Zinc finger protein 207 (Fragment) ZNF207	DNA binding | sequence-specific DNA binding transcription factor activity | protein binding | microtubule binding | heparin binding | zinc ion binding | poly(A) RNA binding |	mitotic sister chromatid segregation | regulation of transcription, DNA-templated | mitotic spindle assembly checkpoint | attachment of spindle microtubules to kinetochore | protein stabilization | regulation of chromosome segregation |	kinetochore | kinetochore | condensed chromosome kinetochore | nucleus | nucleus | microtubule |	J3QS27	6	35
565	lcl|124581	44	0	HLA-C	MHC class I antigen (Fragment)	MHC class I antigen (Fragment) HLA-C	receptor binding | peptide antigen binding | peptide antigen binding | peptide antigen binding | TAP binding |	positive regulation of T cell mediated cytotoxicity | antigen processing and presentation of peptide antigen via MHC class I | antigen processing and presentation of exogenous peptide antigen via MHC class I, TAP-dependent | antigen processing and presentation of exogenous peptide antigen via MHC class I, TAP-independent | antigen processing and presentation of endogenous peptide antigen via MHC …	Golgi membrane | extracellular region | plasma membrane | integral component of plasma membrane | cell surface | cell surface | ER to Golgi transport vesicle membrane | phagocytic vesicle membrane | early endosome membrane | MHC class I protein complex | MHC class I protein complex | extracellular vesicular exosome | integral component of lumenal side of endoplasmic reticulum membrane |	C5J001 G1EQL1	0	44
566	lcl|101491	41	0	SEP15	15 kDa selenoprotein isoform 2 precursor	15 kDa selenoprotein isoform 2 precursor SEP15	selenium binding |	'de novo' posttranslational protein folding |	endoplasmic reticulum lumen |	42741650	2	39
567	lcl|9771	1009	0	LARP4	la-related protein 4 isoform d	la-related protein 4 isoform d LARP4	poly(A) RNA binding |	cytoskeleton organization | regulation of cell morphogenesis |		283046706	12	997
568	lcl|71276	951	0	PCDH11X	protocadherin-11 X-linked isoform a precursor	protocadherin-11 X-linked isoform a precursor PCDH11X	calcium ion binding |	homophilic cell adhesion | negative regulation of phosphatase activity |	plasma membrane | integral component of plasma membrane |	7657443	8	943
569	lcl|132742	861	0	DNAH10	Dynein heavy chain 10, axonemal	Dynein heavy chain 10, axonemal DNAH10	microtubule motor activity | ATP binding | ATPase activity |	microtubule-based movement |	microtubule | axoneme | dynein complex |	F5H515	4	857
570	lcl|39058	139	0	SPATA3	Spermatogenesis-associated protein 3 (Fragment)	Spermatogenesis-associated protein 3 (Fragment) SPATA3	molecular_function |		cellular_component |	H7C283	8	131
571	lcl|44317	178	0		cDNA, FLJ79324, highly similar to Carbamoyl-phosphate synthase (ammonia), mitochondrial (EC 6.3.4.16)	cDNA, FLJ79324, highly similar to Carbamoyl-phosphate synthase (ammonia), mitochondrial (EC 6.3.4.16)				B7ZAW0	2	176
572	lcl|133346	3434	0	MYO7B	Unconventional myosin-VIIb	Unconventional myosin-VIIb MYO7B	motor activity | actin binding | ATP binding |		apical plasma membrane | myosin complex |	C9J6C0	22	3412
573	lcl|4257	895	0		cDNA FLJ58441, highly similar to Attractin	cDNA FLJ58441, highly similar to Attractin				B4DZ36	6	889
574	lcl|32178	1629	0	ADAMTS3	A disintegrin and metalloproteinase with thrombospondin motifs 3	A disintegrin and metalloproteinase with thrombospondin motifs 3 ADAMTS3	metalloendopeptidase activity | heparin binding | zinc ion binding |	extracellular matrix organization | collagen fibril organization | collagen catabolic process |	extracellular region | proteinaceous extracellular matrix | extracellular matrix | extracellular vesicular exosome |	O15072 333360873	26	1603
575	lcl|18397	406	0	PAPLN	Papilin (Fragment)	Papilin (Fragment) PAPLN	metalloendopeptidase activity | serine-type endopeptidase inhibitor activity | zinc ion binding |		basement membrane |	H0YMM2	0	406
576	lcl|80780	1447	0	ZEB2	zinc finger E-box-binding homeobox 2 isoform 2	zinc finger E-box-binding homeobox 2 isoform 2 ZEB2	sequence-specific DNA binding transcription factor activity | phosphatase regulator activity | sequence-specific DNA binding | metal ion binding | R-SMAD binding |	neural crest cell migration | somitogenesis | neural tube closure | transcription, DNA-templated | nervous system development | hippocampus development | cell proliferation in forebrain | positive regulation of Wnt signaling pathway | positive regulation of JUN kinase activity |	nucleus |	284413746	4	1443
577	lcl|55502	305	0	JDP2	PREDICTED: jun dimerization protein 2 isoform X3	PREDICTED: jun dimerization protein 2 isoform X3 JDP2	chromatin binding | double-stranded DNA binding | sequence-specific DNA binding transcription factor activity | protein binding | sequence-specific DNA binding | protein heterodimerization activity |	negative regulation of transcription from RNA polymerase II promoter | transcription, DNA-templated | positive regulation of histone deacetylation | negative regulation of fat cell differentiation |	nucleus |	578825486 205277421	0	305
578	lcl|96209	624	0	SHISA9	PREDICTED: protein shisa-9 isoform X1	PREDICTED: protein shisa-9 isoform X1 SHISA9		regulation of short-term neuronal synaptic plasticity |	ionotropic glutamate receptor complex | cell junction | alpha-amino-3-hydroxy-5-methyl-4-isoxazolepropionic acid selective glutamate receptor complex | dendritic spine membrane | synapse |	530409019	4	620
579	lcl|82559	97	0		Uncharacterized protein	Uncharacterized protein				M0R3B4	4	93
580	lcl|111810	290	0	CDNF	Cerebral dopamine neurotrophic factor	Cerebral dopamine neurotrophic factor CDNF	growth factor activity |		extracellular region |	Q49AH0 82880674	4	286
581	lcl|128821	117	0	NAPA	Alpha-soluble NSF attachment protein (Fragment)	Alpha-soluble NSF attachment protein (Fragment) NAPA	protein binding | syntaxin binding |	intracellular protein transport | intra-Golgi vesicle-mediated transport | post-Golgi vesicle-mediated transport | brain development | regulation of synaptic vesicle priming | neuron differentiation | synaptic transmission, glutamatergic | SNARE complex disassembly | apical protein localization | membrane organization | membrane fusion |	cytosol | synaptobrevin 2-SNAP-25-syntaxin-1a complex | extracellular vesicular exosome |	M0R213	0	117
582	lcl|135728	33	0	ATP8	ATP synthase protein 8	ATP synthase protein 8 ATP8				V9JTG4	0	33
583	lcl|135944	2430	0	RNF40	E3 ubiquitin-protein ligase BRE1B	E3 ubiquitin-protein ligase BRE1B RNF40	ubiquitin-protein ligase activity | protein binding | zinc ion binding | syntaxin-1 binding | ubiquitin protein ligase binding | protein complex binding | protein homodimerization activity |	ubiquitin-dependent protein catabolic process | histone monoubiquitination | histone H2B ubiquitination |	ubiquitin ligase complex | nucleus | HULC complex | neuron projection |	H3BP71	65	2365
584	lcl|8584	114	0	POLR1D	POLR1D protein	POLR1D protein POLR1D	RNA polymerase I activity | RNA polymerase III activity | DNA binding | protein dimerization activity |	transcription from RNA polymerase I promoter | transcription initiation from RNA polymerase I promoter | transcription elongation from RNA polymerase I promoter | termination of RNA polymerase I transcription | transcription from RNA polymerase III promoter | transcription elongation from RNA polymerase III promoter | termination of RNA polymerase III transcription | gene expression | positive re…	nucleoplasm | DNA-directed RNA polymerase III complex | DNA-directed RNA polymerase I complex | cytosol |	Q7Z776	6	108
585	lcl|55134	382	0		cDNA FLJ59471, highly similar to Fanconi anemia group G protein	cDNA FLJ59471, highly similar to Fanconi anemia group G protein				B4DE21	0	382
586	lcl|111233	3	0	COX3	Cytochrome c oxidase subunit 3	Cytochrome c oxidase subunit 3 COX3				H9E7G0	0	3
587	lcl|61094	266	0		TESBP1B	TESBP1B				Q2V062	20	246
588	lcl|45232	678	0		cDNA FLJ76741, highly similar to Homo sapiens crumbs homolog 1 (Drosophila) (CRB1), transcript variant 2, mRNA	cDNA FLJ76741, highly similar to Homo sapiens crumbs homolog 1 (Drosophila) (CRB1), transcript variant 2, mRNA				A8K118	0	678
589	lcl|112474	1203	0	COG4	Conserved oligomeric Golgi complex subunit 4	Conserved oligomeric Golgi complex subunit 4 COG4	protein binding |	retrograde vesicle-mediated transport, Golgi to ER | Golgi organization | protein transport | Golgi vesicle prefusion complex stabilization |	Golgi membrane | Golgi transport complex |	Q9H9E3	0	1203
590	lcl|72316	530	0	HEL-S-77	Epididymis secretory protein Li 77	Epididymis secretory protein Li 77 HEL-S-77				V9HW58 5453629	14	516
591	lcl|104597	593	0	GKAP1	PREDICTED: G kinase-anchoring protein 1 isoform X3	PREDICTED: G kinase-anchoring protein 1 isoform X3 GKAP1		signal transduction |	Golgi apparatus |	578817907	0	593
592	lcl|103631	295	0	FAM71F1	PREDICTED: protein FAM71F1 isoform X13	PREDICTED: protein FAM71F1 isoform X13 FAM71F1				578814688	2	293
593	lcl|134400	1251	0	TBC1D8	PREDICTED: TBC1 domain family member 8 isoform X3	PREDICTED: TBC1 domain family member 8 isoform X3 TBC1D8	Rab GTPase activator activity | calcium ion binding |	blood circulation | positive regulation of cell proliferation |	membrane |	530368477	20	1231
594	lcl|131671	361	0	ENY2	transcription and mRNA export factor ENY2 isoform 2	transcription and mRNA export factor ENY2 isoform 2 ENY2	transcription coactivator activity | ligand-dependent nuclear receptor transcription coactivator activity |	chromatin organization | transcription elongation from RNA polymerase II promoter | mRNA export from nucleus | protein transport | histone deubiquitination | positive regulation of transcription, DNA-templated |	SAGA complex | nuclear pore | transcription export complex 2 | DUBm complex |	302148485	0	361
595	lcl|50437	383	0	ZC2HC1C	Zinc finger C2HC domain-containing protein 1C (Fragment)	Zinc finger C2HC domain-containing protein 1C (Fragment) ZC2HC1C	metal ion binding |			H0YE08	0	383
596	lcl|100507	240	0	IL23R	Interleukin 23 receptor (Fragment)	Interleukin 23 receptor (Fragment) IL23R	interleukin-12 receptor binding | interleukin-23 binding | interleukin-23 receptor activity |	positive regulation of T cell mediated cytotoxicity | positive regulation of defense response to virus by host | positive regulation of defense response to virus by host | positive regulation of T-helper 1 type immune response | positive regulation of T-helper 1 type immune response | inflammatory response | positive regulation of activation of JAK2 kinase activity | response to lipopolysaccharid…	receptor complex | interleukin-23 receptor complex |	B6HY75	8	232
597	lcl|43580	68	0		Putative chemokine-related protein B42	Putative chemokine-related protein B42				Q1T7F1	0	68
598	lcl|76448	94	0	HLA-B	MHC class I antigen (Fragment)	MHC class I antigen (Fragment) HLA-B	receptor binding | receptor binding | peptide antigen binding | peptide antigen binding | peptide antigen binding | TAP binding | TAP binding |	positive regulation of T cell mediated cytotoxicity | positive regulation of T cell mediated cytotoxicity | antigen processing and presentation of peptide antigen via MHC class I | antigen processing and presentation of peptide antigen via MHC class I | antigen processing and presentation of exogenous peptide antigen via MHC class I, TAP-dependent | antigen processing and presentation of exogenou…	Golgi membrane | plasma membrane | integral component of plasma membrane | cell surface | cell surface | ER to Golgi transport vesicle membrane | membrane | integral component of membrane | phagocytic vesicle membrane | early endosome membrane | MHC class I protein complex | MHC class I protein complex | extracellular vesicular exosome | integral component of lumenal side of endoplasmic reticulum…	I7JHQ8	0	94
599	lcl|97809	1305	0	NFKB1	nuclear factor NF-kappa-B p105 subunit isoform 1	nuclear factor NF-kappa-B p105 subunit isoform 1 NFKB1	regulatory region DNA binding | transcription regulatory region sequence-specific DNA binding | nucleic acid binding transcription factor activity | double-stranded DNA binding | sequence-specific DNA binding transcription factor activity | protein binding | transcription factor binding | heat shock protein binding | protein homodimerization activity | transcription regulatory region DNA binding |	negative regulation of transcription from RNA polymerase II promoter | negative regulation of transcription from RNA polymerase II promoter | negative regulation of cytokine production | toll-like receptor signaling pathway | MyD88-dependent toll-like receptor signaling pathway | MyD88-independent toll-like receptor signaling pathway | transcription from RNA polymerase II promoter | apoptotic pro…	nucleus | nucleoplasm | cytoplasm | cytosol | I-kappaB/NF-kappaB complex |	34577122	30	1275
600	lcl|16349	148	0	ANK2	Ankyrin 2 (Fragment)	Ankyrin 2 (Fragment) ANK2	structural constituent of cytoskeleton | protein binding | potassium channel regulator activity | enzyme binding | protein kinase binding | spectrin binding | protein binding, bridging | ion channel binding | ion channel binding | ATPase binding |	regulation of heart rate | atrial septum development | cellular calcium ion homeostasis | axon guidance | positive regulation of gene expression | regulation of cardiac muscle contraction by regulation of the release of sequestered calcium ion | regulation of cardiac muscle contraction by regulation of the release of sequestered calcium ion | regulation of cardiac muscle contraction by calcium io…	intracellular | cytosol | cytoskeleton | plasma membrane | integral component of plasma membrane | intercalated disc | basolateral plasma membrane | apical plasma membrane | Z disc | T-tubule | M band | A band | sarcolemma | neuron projection | costamere | membrane raft | postsynaptic membrane | perinuclear region of cytoplasm |	A5XEJ9	0	148
601	lcl|26512	2136	0	ALK	Tyrosine-protein kinase receptor	Tyrosine-protein kinase receptor ALK	NF-kappaB-inducing kinase activity | protein tyrosine kinase activity | transmembrane receptor protein tyrosine kinase activity | transmembrane receptor protein tyrosine kinase activity | protein binding | ATP binding |	activation of MAPK activity | signal transduction | transmembrane receptor protein tyrosine kinase signaling pathway | cell proliferation | phosphorylation | phosphorylation | peptidyl-tyrosine phosphorylation | peptidyl-tyrosine phosphorylation | NIK/NF-kappaB signaling | regulation of apoptotic process | protein autophosphorylation | protein autophosphorylation | neuron development | positive r…	integral component of plasma membrane | integral component of plasma membrane | protein complex | extracellular vesicular exosome |	B6D4Y7	44	2092
602	lcl|31426	925	0	RHPN2	Rhophilin-2	Rhophilin-2 RHPN2		signal transduction |	perinuclear region of cytoplasm |	Q8IUC4 228008333	35	890
603	lcl|134055	240	0	FAHD2A	Fumarylacetoacetate hydrolase domain-containing protein 2A (Fragment)	Fumarylacetoacetate hydrolase domain-containing protein 2A (Fragment) FAHD2A	hydrolase activity | metal ion binding |			C9JGM0	0	240
604	lcl|107072	505	0		cDNA FLJ60514, highly similar to Fructosamine-3-kinase (EC 2.7.1.-)	cDNA FLJ60514, highly similar to Fructosamine-3-kinase (EC 2.7.1.-)				B4DH12	14	491
605	lcl|123540	1693	0	MEGF6	PREDICTED: multiple epidermal growth factor-like domains protein 6 isoform X3	PREDICTED: multiple epidermal growth factor-like domains protein 6 isoform X3 MEGF6	calcium ion binding | protein binding |	biological_process |	cellular_component | extracellular region |	578798520	8	1685
606	lcl|142748	372	0	NR1I3	nuclear receptor subfamily 1 group I member 3 isoform 10	nuclear receptor subfamily 1 group I member 3 isoform 10 NR1I3	DNA binding | sequence-specific DNA binding transcription factor activity | transcription coactivator activity | ligand-activated sequence-specific DNA binding RNA polymerase II transcription factor activity | androgen receptor activity | thyroid hormone receptor activity | zinc ion binding | sequence-specific DNA binding |	transcription initiation from RNA polymerase II promoter | signal transduction | gene expression | androgen receptor signaling pathway | intracellular receptor signaling pathway | negative regulation of transcription, DNA-templated |	nucleus | nucleoplasm | cytoplasm | cytosol | cytoskeleton |	117938750	4	368
607	lcl|116861	773	0	TNIP3	TNFAIP3-interacting protein 3	TNFAIP3-interacting protein 3 TNIP3	polyubiquitin binding |	MyD88-independent toll-like receptor signaling pathway | inflammatory response | toll-like receptor 4 signaling pathway | negative regulation of I-kappaB kinase/NF-kappaB signaling | cellular response to lipopolysaccharide |		Q96KP6 192807305	4	769
608	lcl|40816	188	0		cDNA FLJ58419, moderately similar to Tuftelin	cDNA FLJ58419, moderately similar to Tuftelin				B7Z5P6	4	184
609	lcl|15469	1419	0	SHISA8	PREDICTED: putative protein shisa-8 isoform X2	PREDICTED: putative protein shisa-8 isoform X2 SHISA8			integral component of membrane |	578837234	60	1359
610	lcl|131672	803	0		cDNA FLJ60979, highly similar to Dipeptidyl peptidase 8 (EC 3.4.14.5)	cDNA FLJ60979, highly similar to Dipeptidyl peptidase 8 (EC 3.4.14.5)				B4DYW8	4	799
611	lcl|131957	63	0	HLA-B	HLA class I histocompatibility antigen, B-56 alpha chain	HLA class I histocompatibility antigen, B-56 alpha chain HLA-B	receptor binding | receptor binding | peptide antigen binding | peptide antigen binding | peptide antigen binding | TAP binding | TAP binding |	positive regulation of T cell mediated cytotoxicity | positive regulation of T cell mediated cytotoxicity | antigen processing and presentation of peptide antigen via MHC class I | antigen processing and presentation of peptide antigen via MHC class I | antigen processing and presentation of exogenous peptide antigen via MHC class I, TAP-dependent | antigen processing and presentation of exogenou…	Golgi membrane | plasma membrane | integral component of plasma membrane | cell surface | cell surface | ER to Golgi transport vesicle membrane | membrane | integral component of membrane | phagocytic vesicle membrane | early endosome membrane | MHC class I protein complex | MHC class I protein complex | extracellular vesicular exosome | integral component of lumenal side of endoplasmic reticulum…	P30495 C6K6I6	0	63
612	lcl|124335	773	0	PAF1	Paf1, RNA polymerase II associated factor, homolog (S. cerevisiae), isoform CRA_c	Paf1, RNA polymerase II associated factor, homolog (S. cerevisiae), isoform CRA_c PAF1	RNA polymerase II core binding | chromatin binding | protein binding |	negative regulation of transcription from RNA polymerase II promoter | endodermal cell fate commitment | transcription, DNA-templated | mRNA polyadenylation | histone monoubiquitination | Wnt signaling pathway | stem cell maintenance | positive regulation of mRNA 3'-end processing | positive regulation of transcription elongation from RNA polymerase II promoter | histone H2B ubiquitination | nega…	Cdc73/Paf1 complex |	M0QX35 378744165	22	751
613	lcl|60191	205	0	HLA-A	MHC class I antigen	MHC class I antigen HLA-A	receptor binding | receptor binding | protein binding | peptide antigen binding | peptide antigen binding | peptide antigen binding | poly(A) RNA binding | TAP binding |	positive regulation of T cell mediated cytotoxicity | positive regulation of T cell mediated cytotoxicity | antigen processing and presentation of peptide antigen via MHC class I | antigen processing and presentation of exogenous peptide antigen via MHC class I, TAP-dependent | antigen processing and presentation of exogenous peptide antigen via MHC class I, TAP-independent | antigen processing a…	Golgi membrane | plasma membrane | integral component of plasma membrane | cell surface | ER to Golgi transport vesicle membrane | phagocytic vesicle membrane | early endosome membrane | MHC class I protein complex | MHC class I protein complex | extracellular vesicular exosome | integral component of lumenal side of endoplasmic reticulum membrane |	C5IWX9	4	201
614	lcl|130315	733	0	WNT5B	PREDICTED: protein Wnt-5b isoform X1	PREDICTED: protein Wnt-5b isoform X1 WNT5B	receptor binding | frizzled binding |	chondrocyte differentiation | Wnt signaling pathway | Wnt signaling pathway | neuron differentiation | neuron differentiation | positive regulation of cell migration | wound healing | cell fate commitment | fat cell differentiation | positive regulation of fat cell differentiation | lens fiber cell development | cellular response to retinoic acid | negative regulation of canonical Wnt signaling p…	extracellular region | proteinaceous extracellular matrix | extracellular space | endoplasmic reticulum lumen | Golgi lumen | plasma membrane | cell surface | extracellular vesicular exosome |	530398888	2	731
615	lcl|46314	1110	0	CAPS2	PREDICTED: calcyphosin-2 isoform X9	PREDICTED: calcyphosin-2 isoform X9 CAPS2	calcium ion binding |			578824349	24	1086
616	lcl|75126	55	0		Prolactin receptor (Fragment)	Prolactin receptor (Fragment)				Q86XS2	0	55
617	lcl|147928	82	0	HLA-DQB1	MHC class II HLA-DQ-beta-1 (Fragment)	MHC class II HLA-DQ-beta-1 (Fragment) HLA-DQB1	MHC class II receptor activity |	immunoglobulin production involved in immunoglobulin mediated immune response | humoral immune response mediated by circulating immunoglobulin | immune response | cytokine-mediated signaling pathway | antigen processing and presentation of exogenous peptide antigen via MHC class II | T cell costimulation | T cell receptor signaling pathway | interferon-gamma-mediated signaling pathway |	Golgi membrane | lysosomal membrane | plasma membrane | endosome membrane | ER to Golgi transport vesicle membrane | membrane | transport vesicle membrane | endocytic vesicle membrane | clathrin-coated endocytic vesicle membrane | trans-Golgi network membrane | MHC class II protein complex | integral component of lumenal side of endoplasmic reticulum membrane |	Q29904	0	82
618	lcl|135840	141	0	ISLR	Immunoglobulin superfamily-containing leucine-rich repeat protein (Fragment)	Immunoglobulin superfamily-containing leucine-rich repeat protein (Fragment) ISLR		cell adhesion |	extracellular region |	H0YL90	0	141
619	lcl|15965	19	0	DNASE1	Deoxyribonuclease-1 (Fragment)	Deoxyribonuclease-1 (Fragment) DNASE1	actin binding | deoxyribonuclease I activity | protein binding |	apoptotic process |	extracellular region | nuclear envelope |	I3L4B8	0	19
620	lcl|128192	562	0	CYP2C9	Cytochrome P450 family 2 subfamily C polypeptide 9	Cytochrome P450 family 2 subfamily C polypeptide 9 CYP2C9	monooxygenase activity | monooxygenase activity | iron ion binding | drug binding | steroid hydroxylase activity | oxidoreductase activity | (S)-limonene 6-monooxygenase activity | (S)-limonene 7-monooxygenase activity | heme binding | caffeine oxidase activity | (R)-limonene 6-monooxygenase activity |	xenobiotic metabolic process | steroid metabolic process | monoterpenoid metabolic process | drug metabolic process | drug metabolic process | arachidonic acid metabolic process | epoxygenase P450 pathway | urea metabolic process | monocarboxylic acid metabolic process | drug catabolic process | exogenous drug catabolic process | cellular amide metabolic process | small molecule metabolic process…	endoplasmic reticulum membrane | intracellular membrane-bounded organelle | intracellular membrane-bounded organelle |	S5R8H1	4	558
621	lcl|129792	3107	0	THOC2	PREDICTED: THO complex subunit 2 isoform X11	PREDICTED: THO complex subunit 2 isoform X11 THOC2	RNA binding | protein binding |	mRNA processing | mRNA export from nucleus | RNA splicing | poly(A)+ mRNA export from nucleus | viral mRNA export from host cell nucleus |	transcription export complex | THO complex | THO complex part of transcription export complex | nuclear speck |	578838717	42	3065
622	lcl|91811	1614	0		cDNA, FLJ96911, highly similar to Homo sapiens nucleosomal binding protein 1 (NSBP1), mRNA	cDNA, FLJ96911, highly similar to Homo sapiens nucleosomal binding protein 1 (NSBP1), mRNA				B2RE40	22	1592
623	lcl|122487	231	0	RNF217	Probable E3 ubiquitin-protein ligase RNF217	Probable E3 ubiquitin-protein ligase RNF217 RNF217	ubiquitin-protein ligase activity | zinc ion binding |	protein ubiquitination involved in ubiquitin-dependent protein catabolic process |	integral component of membrane |	E5RFY6	0	231
624	lcl|63047	662	0	hCG_1998531	HCG1998531, isoform CRA_d	HCG1998531, isoform CRA_d hCG_1998531				B4DL69 380503839	8	654
625	lcl|157848	721	0	SAMD14	PREDICTED: sterile alpha motif domain-containing protein 14 isoform X3	PREDICTED: sterile alpha motif domain-containing protein 14 isoform X3 SAMD14				578830561	10	711
626	lcl|132741	199	0	MBOAT7	Lysophospholipid acyltransferase 7 (Fragment)	Lysophospholipid acyltransferase 7 (Fragment) MBOAT7	protein binding | transferase activity, transferring acyl groups other than amino-acyl groups |	phospholipid metabolic process | ventricular system development | phosphatidylinositol acyl-chain remodeling | small molecule metabolic process | glycerophospholipid biosynthetic process |	endoplasmic reticulum membrane | integral component of membrane |	A9C4B8	0	199
627	lcl|100988	532	0	HNF1B	Hepatocyte nuclear factor 1-beta	Hepatocyte nuclear factor 1-beta HNF1B	DNA binding | sequence-specific DNA binding transcription factor activity | RNA polymerase II distal enhancer sequence-specific DNA binding transcription factor activity | protein binding | protein homodimerization activity | protein homodimerization activity | sequence-specific DNA binding | transcription regulatory region DNA binding | protein heterodimerization activity |	negative regulation of transcription from RNA polymerase II promoter | endodermal cell fate specification | kidney development | kidney development | inner cell mass cell differentiation | response to glucose | anterior/posterior pattern specification | insulin secretion | regulation of Wnt signaling pathway | hindbrain development | endocrine pancreas development | endocrine pancreas development…	nucleus | transcription factor complex |	P35680 Q6FHW6 4507397	10	522
628	lcl|2289	455	0		cDNA, FLJ79054, highly similar to Hsc70-interacting protein	cDNA, FLJ79054, highly similar to Hsc70-interacting protein				B7ZA40	8	447
629	lcl|133547	1323	0	ATP11C	PREDICTED: probable phospholipid-transporting ATPase IG isoform X3	PREDICTED: probable phospholipid-transporting ATPase IG isoform X3 ATP11C	magnesium ion binding | phospholipid-translocating ATPase activity | protein binding | ATP binding | cation-transporting ATPase activity |	ion transmembrane transport | phospholipid translocation | transmembrane transport |	lysosomal membrane | endoplasmic reticulum | endoplasmic reticulum membrane | plasma membrane | plasma membrane | integral component of membrane |	578838665 578838667	8	1315
630	lcl|38952	143	0	PPWD1	Peptidylprolyl isomerase domain and WD repeat-containing protein 1 (Fragment)	Peptidylprolyl isomerase domain and WD repeat-containing protein 1 (Fragment) PPWD1	peptidyl-prolyl cis-trans isomerase activity |	mRNA splicing, via spliceosome | protein folding |	catalytic step 2 spliceosome |	D6RD43	0	143
631	lcl|27551	205	0	DKFZp547B243	Putative uncharacterized protein DKFZp547B243 (Fragment)	Putative uncharacterized protein DKFZp547B243 (Fragment) DKFZp547B243				Q9NSH2	0	205
632	lcl|3775	51	0		HLA-A11 (Fragment)	HLA-A11 (Fragment)				O19618	0	51
633	lcl|37593	882	0	ELMO2	Engulfment and cell motility protein 2	Engulfment and cell motility protein 2 ELMO2	protein binding | SH3 domain binding | receptor tyrosine kinase binding |	apoptotic process | Fc-gamma receptor signaling pathway involved in phagocytosis | innate immune response | cell chemotaxis |	cytosol | cytosol | cytoskeleton | membrane |	Q96JJ3 530418279 578836138 19718769 33469947	20	862
634	lcl|152776	143	0	APH1B	Gamma-secretase subunit APH-1B (Fragment)	Gamma-secretase subunit APH-1B (Fragment) APH1B	protein binding | peptidase activity |	Notch signaling pathway | Notch receptor processing | protein processing | membrane protein intracellular domain proteolysis | positive regulation of apoptotic process | positive regulation of catalytic activity | neurotrophin TRK receptor signaling pathway | apoptotic signaling pathway |	plasma membrane | integral component of membrane | transport vesicle |	H0YLT0	0	143
635	lcl|144993	578	0	GOT1	Aspartate aminotransferase	Aspartate aminotransferase GOT1	L-aspartate:2-oxoglutarate aminotransferase activity | L-aspartate:2-oxoglutarate aminotransferase activity | L-aspartate:2-oxoglutarate aminotransferase activity | phosphatidylserine decarboxylase activity | transaminase activity | pyridoxal phosphate binding | carboxylic acid binding | L-cysteine:2-oxoglutarate aminotransferase activity | L-phenylalanine:2-oxoglutarate aminotransferase activity…	sulfur amino acid metabolic process | carbohydrate metabolic process | glucose metabolic process | gluconeogenesis | 2-oxoglutarate metabolic process | oxaloacetate metabolic process | glycerol biosynthetic process | aspartate metabolic process | aspartate biosynthetic process | aspartate catabolic process | glutamate metabolic process | polyamine metabolic process | cellular amino acid biosynthe…	nucleus | cytoplasm | lysosome | cytosol | axon terminus | extracellular vesicular exosome |	B7Z7E9	0	578
636	lcl|68147	106	0	CD53	Leukocyte surface antigen CD53	Leukocyte surface antigen CD53 CD53	protein binding |	signal transduction | positive regulation of myoblast fusion |	immunological synapse | plasma membrane | cell-cell junction | cell surface | integral component of membrane | extracellular vesicular exosome |	P19397 10834972 91106727	0	106
637	lcl|107270	26	0	ND5	NADH-ubiquinone oxidoreductase chain 5	NADH-ubiquinone oxidoreductase chain 5 ND5				H9RCL3	12	14
638	lcl|114423	867	0	C10orf76	PREDICTED: UPF0668 protein C10orf76 isoform X2	PREDICTED: UPF0668 protein C10orf76 isoform X2 C10orf76			integral component of membrane |	578819773	6	861
639	lcl|153280	1922	0	SORBS1	PREDICTED: sorbin and SH3 domain-containing protein 1 isoform X61	PREDICTED: sorbin and SH3 domain-containing protein 1 isoform X61 SORBS1	actin binding | SH3/SH2 adaptor activity | SH3/SH2 adaptor activity | insulin receptor binding | protein binding | cytoskeletal protein binding | protein kinase binding |	muscle contraction | cell-matrix adhesion | insulin receptor signaling pathway | positive regulation of signal transduction | positive regulation of signal transduction | glucose transport | cellular response to insulin stimulus | stress fiber assembly | positive regulation of glycogen biosynthetic process | positive regulation of glucose import | positive regulation of lipid biosynthetic process…	stress fiber | nucleus | cytosol | cytosol | insulin receptor complex | cell-cell adherens junction | zonula adherens | cell-substrate adherens junction | focal adhesion | nuclear matrix | membrane raft |	578818806	45	1877
640	lcl|101217	158	0		Thymus specific serine peptidase (Fragment)	Thymus specific serine peptidase (Fragment)				Q7Z5N6	4	154
641	lcl|116074	292	0	FAM133B	Protein FAM133B	Protein FAM133B FAM133B	poly(A) RNA binding |			G3XAI9	2	290
642	lcl|29678	52	0	HLA-DRB1	MHC class II antigen (Fragment)	MHC class II antigen (Fragment) HLA-DRB1	MHC class II protein complex binding | MHC class II receptor activity | MHC class II receptor activity | peptide antigen binding |	immunoglobulin production involved in immunoglobulin mediated immune response | immunoglobulin production involved in immunoglobulin mediated immune response | inflammatory response to antigenic stimulus | humoral immune response mediated by circulating immunoglobulin | humoral immune response mediated by circulating immunoglobulin | immune response | immune response | detection of bacterium | cy…	Golgi membrane | lysosomal membrane | lysosomal membrane | plasma membrane | integral component of plasma membrane | external side of plasma membrane | ER to Golgi transport vesicle membrane | membrane | transport vesicle membrane | endocytic vesicle membrane | clathrin-coated endocytic vesicle membrane | late endosome membrane | trans-Golgi network membrane | MHC class II protein complex | extra…	F1AQS3	0	52
643	lcl|47865	47	0	MTIF2	Translation initiation factor IF-2, mitochondrial (Fragment)	Translation initiation factor IF-2, mitochondrial (Fragment) MTIF2	translation initiation factor activity | GTPase activity | GTP binding | translation factor activity, nucleic acid binding | ribosomal small subunit binding | poly(A) RNA binding |	formation of translation initiation complex | regulation of translational initiation | ribosome disassembly |	mitochondrion |	E7ESE3	0	47
644	lcl|107438	854	0	IRX4	Iroquois-class homeodomain protein IRX-4	Iroquois-class homeodomain protein IRX-4 IRX4	sequence-specific DNA binding transcription factor activity | sequence-specific DNA binding |	heart development | establishment of organ orientation |	nucleus |	P78413 520975447 520975438 7705555	49	805
645	lcl|123668	1013	0	PCDH11Y	Protocadherin-11 Y-linked	Protocadherin-11 Y-linked PCDH11Y	calcium ion binding |	homophilic cell adhesion |	plasma membrane | integral component of membrane |	Q9BZA8 14589946	4	1009
646	lcl|77796	146	0	ZNF410	Zinc finger protein 410, isoform CRA_c	Zinc finger protein 410, isoform CRA_c ZNF410	DNA binding | metal ion binding |	transcription, DNA-templated | regulation of transcription, DNA-templated |	nucleus |	B4DPW2	37	109
647	lcl|152983	1503	0	ARHGAP33	PREDICTED: rho GTPase-activating protein 33 isoform X7	PREDICTED: rho GTPase-activating protein 33 isoform X7 ARHGAP33	protein binding | Rac GTPase activator activity | phosphatidylinositol binding |	small GTPase mediated signal transduction | protein transport | regulation of small GTPase mediated signal transduction |	cytosol | plasma membrane |	578833920	24	1479
648	lcl|4487	247	0	ZNF706	Zinc finger protein 706	Zinc finger protein 706 ZNF706	metal ion binding |			Q9Y5V0 110227589 390979662 390979660 7705817	4	243
649	lcl|72179	276	0	TPSAB1	Tryptase alpha/beta 1	Tryptase alpha/beta 1 TPSAB1	serine-type endopeptidase activity | protein binding | serine-type peptidase activity |	defense response | extracellular matrix disassembly | extracellular matrix organization |	extracellular region | extracellular space | extracellular matrix |	Q6B051	0	276
650	lcl|100416	482	0	IKBKG	NF-kappa-B essential modulator (Fragment)	NF-kappa-B essential modulator (Fragment) IKBKG	signal transducer activity | protein binding | protein domain specific binding | protein homodimerization activity | metal ion binding | protein heterodimerization activity |	activation of MAPK activity | B cell homeostasis | toll-like receptor signaling pathway | MyD88-dependent toll-like receptor signaling pathway | MyD88-independent toll-like receptor signaling pathway | transcription, DNA-templated | apoptotic process | inflammatory response | immune response | cellular response to DNA damage stimulus | I-kappaB kinase/NF-kappaB signaling | activation of NF-kappaB…	intracellular | nucleus | cytoplasm | cytosol | IkappaB kinase complex | IkappaB kinase complex | IkappaB kinase complex |	C9JN51	0	482
651	lcl|66945	534	0	TBC1D16	TBC1D16 protein (Fragment)	TBC1D16 protein (Fragment) TBC1D16	Rab GTPase activator activity |			Q96DH7	4	530
652	lcl|130394	17	0	AKT2	RAC-beta serine/threonine-protein kinase (Fragment)	RAC-beta serine/threonine-protein kinase (Fragment) AKT2	protein serine/threonine kinase activity | protein serine/threonine kinase activity | protein binding | ATP binding | kinase activity |	positive regulation of protein phosphorylation | glycogen biosynthetic process | glucose metabolic process | regulation of translation | cellular protein modification process | apoptotic process | signal transduction | insulin receptor signaling pathway | insulin receptor signaling pathway | carbohydrate transport | negative regulation of plasma membrane long-chain fatty acid transport | positive…	nucleus | nucleus | cytosol | plasma membrane | plasma membrane | cell cortex | ruffle membrane |	J3KTP4	0	17
653	lcl|75334	2	0	ND6	NADH-ubiquinone oxidoreductase chain 6	NADH-ubiquinone oxidoreductase chain 6 ND6				A8R1N6	0	2
654	lcl|10569	640	0	TLOC1	Translocation protein 1, isoform CRA_b	Translocation protein 1, isoform CRA_b TLOC1				D3DNQ1	8	632
655	lcl|58951	884	0	NPIPB8	Nuclear pore complex-interacting protein family member B8	Nuclear pore complex-interacting protein family member B8 NPIPB8				E9PQR5 578828729 578828731 578828733	10	874
656	lcl|68414	1394	0	RUFY2	RUN and FYVE domain-containing protein 2 (Fragment)	RUN and FYVE domain-containing protein 2 (Fragment) RUFY2	metal ion binding |		nucleus |	H0YD93	2	1392
657	lcl|119711	278	0	HPR	Haptoglobin-related protein	Haptoglobin-related protein HPR	catalytic activity | hemoglobin binding |		extracellular region | spherical high-density lipoprotein particle | blood microparticle |	J3KTC3	20	258
658	lcl|114824	773	0	ATAT1	Alpha-tubulin N-acetyltransferase	Alpha-tubulin N-acetyltransferase ATAT1	tubulin N-acetyltransferase activity |	neuron development | regulation of microtubule cytoskeleton organization | alpha-tubulin acetylation |	cytoplasm | spindle | coated pit | focal adhesion | axon |	Q5SQI0 530382635 530428176 530428521 530428813 530429073 530429438 530429722	22	751
659	lcl|39571	284	0	ACAD9	Acyl-CoA dehydrogenase family member 9, mitochondrial	Acyl-CoA dehydrogenase family member 9, mitochondrial ACAD9	acyl-CoA dehydrogenase activity | flavin adenine dinucleotide binding |		nucleus | mitochondrion | dendrite |	D6RGK6	0	284
660	lcl|121122	465	0	GPC3	glypican-3 isoform 4 precursor	glypican-3 isoform 4 precursor GPC3	protein binding | heparan sulfate proteoglycan binding | peptidyl-dipeptidase inhibitor activity |	retinoid metabolic process | branching involved in ureteric bud morphogenesis | carbohydrate metabolic process | glycosaminoglycan biosynthetic process | glycosaminoglycan catabolic process | phototransduction, visible light | anatomical structure morphogenesis | anterior/posterior axis specification | body morphogenesis | glycosaminoglycan metabolic process | chondroitin sulfate metabolic proces…	proteinaceous extracellular matrix | extracellular space | Golgi lumen | plasma membrane | integral component of plasma membrane | lysosomal lumen | anchored component of plasma membrane |	257471010	17	448
661	lcl|62114	563	0	NETO1	neuropilin and tolloid-like protein 1 isoform 3 precursor	neuropilin and tolloid-like protein 1 isoform 3 precursor NETO1		memory | visual learning | regulation of long-term neuronal synaptic plasticity |	extracellular region | postsynaptic density | cell junction | kainate selective glutamate receptor complex | postsynaptic membrane | excitatory synapse |	20373181 319918840	4	559
662	lcl|34699	96	0	ND4	NADH-ubiquinone oxidoreductase chain 4	NADH-ubiquinone oxidoreductase chain 4 ND4				H9R171	4	92
663	lcl|102495	919	0	GPR126	G-protein coupled receptor 126 isoform beta 1 precursor	G-protein coupled receptor 126 isoform beta 1 precursor GPR126	G-protein coupled receptor activity |	G-protein coupled receptor signaling pathway | neuropeptide signaling pathway |	plasma membrane | integral component of membrane |	50355941	12	907
664	lcl|67851	35	0	HLA-C	MHC class I antigen (Fragment)	MHC class I antigen (Fragment) HLA-C	receptor binding | peptide antigen binding | peptide antigen binding | peptide antigen binding | TAP binding |	positive regulation of T cell mediated cytotoxicity | antigen processing and presentation of peptide antigen via MHC class I | antigen processing and presentation of exogenous peptide antigen via MHC class I, TAP-dependent | antigen processing and presentation of exogenous peptide antigen via MHC class I, TAP-independent | antigen processing and presentation of endogenous peptide antigen via MHC …	Golgi membrane | extracellular region | plasma membrane | integral component of plasma membrane | cell surface | cell surface | ER to Golgi transport vesicle membrane | phagocytic vesicle membrane | early endosome membrane | MHC class I protein complex | MHC class I protein complex | extracellular vesicular exosome | integral component of lumenal side of endoplasmic reticulum membrane |	U5YD78	0	35
665	lcl|914	146	0	DEK	Alternative protein DEK	Alternative protein DEK DEK	DNA binding | histone binding | poly(A) RNA binding |	regulation of transcription from RNA polymerase II promoter | transcription from RNA polymerase II promoter | signal transduction | chromatin modification | viral genome replication | regulation of double-strand break repair | regulation of double-strand break repair via nonhomologous end joining |	nucleus |	L8EA44	0	146
666	lcl|25629	171	0	PI16	PREDICTED: peptidase inhibitor 16 isoform X3	PREDICTED: peptidase inhibitor 16 isoform X3 PI16	peptidase inhibitor activity |		extracellular region | integral component of membrane |	530381599	0	171
667	lcl|66048	4	0	CYTB	Cytochrome b	Cytochrome b CYTB				Q4VFF9	4	0
668	lcl|96506	144	0		cDNA FLJ53538	cDNA FLJ53538				B4DU45	0	144
669	lcl|93695	155	0	Tcr-alpha	HCG2039774 (Fragment)	HCG2039774 (Fragment) Tcr-alpha				A0N4Z2	0	155
670	lcl|146994	1075	0		cDNA FLJ56653, highly similar to Ribosomal protein S6 kinase alpha-3 (EC 2.7.11.1)	cDNA FLJ56653, highly similar to Ribosomal protein S6 kinase alpha-3 (EC 2.7.11.1)				B4DKZ2	6	1069
671	lcl|155138	149	0	PRSS16	Thymus-specific serine protease	Thymus-specific serine protease PRSS16	serine-type peptidase activity |	protein catabolic process |	lysosome | endosome | cytoplasmic membrane-bounded vesicle |	F2Z2N5	0	149
672	lcl|143489	1611	0	LONP2	Lon protease homolog 2, peroxisomal	Lon protease homolog 2, peroxisomal LONP2	protease binding | ATP-dependent peptidase activity | serine-type endopeptidase activity | receptor binding | protein binding | ATP binding | peptidase activity | enzyme binding | sequence-specific DNA binding |	ATP catabolic process | signal peptide processing | misfolded or incompletely synthesized protein catabolic process | protein targeting to peroxisome | peroxisome organization | response to organic cyclic compound | protein import into peroxisome matrix | regulation of fatty acid beta-oxidation |	nucleus | peroxisome | peroxisomal matrix | nucleoid |	Q86WA8 31377667	28	1583
673	lcl|116417	731	0		cDNA FLJ51155	cDNA FLJ51155				B7Z7Z0	2	729
674	lcl|108468	578	0	ANKFN1	Ankyrin repeat and fibronectin type-III domain-containing protein 1 (Fragment)	Ankyrin repeat and fibronectin type-III domain-containing protein 1 (Fragment) ANKFN1				I3L0N6	4	574
675	lcl|1396	254	0	CEP128	Centrosomal protein of 128 kDa (Fragment)	Centrosomal protein of 128 kDa (Fragment) CEP128			spindle pole | centriole |	H0YJD7	2	252
676	lcl|118127	1	0	COX3	Cytochrome c oxidase subunit 3	Cytochrome c oxidase subunit 3 COX3				H9P818	0	1
677	lcl|84645	1243	0	SH3D19	SH3 domain-containing protein 19 isoform 2	SH3 domain-containing protein 19 isoform 2 SH3D19	protein binding | proline-rich region binding |	post-Golgi vesicle-mediated transport | cytoskeleton organization | regulation of cell morphogenesis | positive regulation of membrane protein ectodomain proteolysis | membrane organization |	cytosol | plasma membrane |	193083143 343403790	4	1239
678	lcl|73098	96	0	MFSD11	PREDICTED: UNC93-like protein MFSD11 isoform X3	PREDICTED: UNC93-like protein MFSD11 isoform X3 MFSD11	molecular_function |	biological_process |	cellular_component | integral component of membrane |	530412840	6	90
679	lcl|113175	10	0	DDX5	Probable ATP-dependent RNA helicase DDX5 (Fragment)	Probable ATP-dependent RNA helicase DDX5 (Fragment) DDX5	transcription coactivator activity | RNA helicase activity | RNA helicase activity | ATP-dependent RNA helicase activity | protein binding | calmodulin binding | ATP binding | enzyme binding | estrogen receptor binding | pre-mRNA binding | poly(A) RNA binding | calcium-dependent protein binding | androgen receptor binding |	negative regulation of transcription from RNA polymerase II promoter | regulation of alternative mRNA splicing, via spliceosome | mRNA splicing, via spliceosome | in utero embryonic development | transcription, DNA-templated | circadian rhythm | cell growth | positive regulation of intracellular estrogen receptor signaling pathway | positive regulation of DNA damage response, signal transduction …	nucleus | nucleolus | ribonucleoprotein complex | extracellular vesicular exosome | catalytic step 2 spliceosome |	J3QLG9	0	10
680	lcl|52168	33	0	TRIM41	TRIM41 protein	TRIM41 protein TRIM41	protein binding | zinc ion binding | ligase activity |	protein ubiquitination |	cytoplasm |	A1A4S2	0	33
681	lcl|62302	716	0	NHSL2	NHS-like protein 2	NHS-like protein 2 NHSL2				Q5HYW2	10	706
682	lcl|84005	1841	0		Nucleolar GTP-binding protein 1 (Fragment)	Nucleolar GTP-binding protein 1 (Fragment)				Q53GS0	18	1823
683	lcl|111448	571	0	FGD5	Alternative protein FGD5	Alternative protein FGD5 FGD5	guanyl-nucleotide exchange factor activity | Rho guanyl-nucleotide exchange factor activity | protein binding | small GTPase binding | metal ion binding |	cytoskeleton organization | regulation of cell shape | actin cytoskeleton organization | regulation of Cdc42 GTPase activity | filopodium assembly |	ruffle | cytoplasm | early endosome | endoplasmic reticulum | Golgi apparatus | cytoskeleton | lamellipodium | ruffle membrane |	L0R6G7	6	565
684	lcl|99372	49	0	CTNNA2	Catenin alpha-2	Catenin alpha-2 CTNNA2	structural constituent of cytoskeleton | protein binding | cadherin binding |	axonogenesis | single organismal cell-cell adhesion | radial glia guided migration of Purkinje cell | muscle cell differentiation | dendrite morphogenesis | brain morphogenesis | positive regulation of muscle cell differentiation | regulation of synapse structural plasticity | prepulse inhibition |	cytoplasm | cytosol | adherens junction | cell-cell adherens junction | actin cytoskeleton | basolateral plasma membrane | lamellipodium | axon |	B8ZZE7	0	49
685	lcl|95373	14	0	ACTR10	Actin-related protein 10	Actin-related protein 10 ACTR10		microtubule-based movement |	cytoplasm | dynactin complex |	G3V4K6	0	14
686	lcl|118929	162	0	GLI4	Zinc finger protein GLI4 (Fragment)	Zinc finger protein GLI4 (Fragment) GLI4	molecular_function | DNA binding | sequence-specific DNA binding transcription factor activity | metal ion binding |	regulation of transcription, DNA-templated | biological_process |	nucleus |	H0YBH2	4	158
687	lcl|123098	43	0	HLA-B	MHC class I antigen (Fragment)	MHC class I antigen (Fragment) HLA-B	receptor binding | receptor binding | peptide antigen binding | peptide antigen binding | peptide antigen binding | TAP binding | TAP binding |	positive regulation of T cell mediated cytotoxicity | positive regulation of T cell mediated cytotoxicity | antigen processing and presentation of peptide antigen via MHC class I | antigen processing and presentation of peptide antigen via MHC class I | antigen processing and presentation of exogenous peptide antigen via MHC class I, TAP-dependent | antigen processing and presentation of exogenou…	Golgi membrane | plasma membrane | integral component of plasma membrane | cell surface | cell surface | ER to Golgi transport vesicle membrane | membrane | integral component of membrane | phagocytic vesicle membrane | early endosome membrane | MHC class I protein complex | MHC class I protein complex | extracellular vesicular exosome | integral component of lumenal side of endoplasmic reticulum…	D5FHX9 G9HRM2	0	43
688	lcl|123875	1032	0	MAP4K2	PREDICTED: mitogen-activated protein kinase kinase kinase kinase 2 isoform X1	PREDICTED: mitogen-activated protein kinase kinase kinase kinase 2 isoform X1 MAP4K2	protein serine/threonine kinase activity | small GTPase regulator activity | protein binding | ATP binding | MAP kinase kinase kinase kinase activity | mitogen-activated protein kinase kinase kinase binding |	activation of MAPKKK activity | protein phosphorylation | vesicle targeting | immune response | JNK cascade | activation of JUN kinase activity | intracellular signal transduction | innate immune response | positive regulation of JNK cascade |	Golgi membrane | cytoplasm | basolateral plasma membrane |	530397078	24	1008
689	lcl|64794	276	0	SLC35E2	solute carrier family 35 member E2 isoform 2	solute carrier family 35 member E2 isoform 2 SLC35E2			integral component of membrane |	315139029	0	276
690	lcl|6415	401	0	CHEK1	Serine/threonine-protein kinase Chk1 (Fragment)	Serine/threonine-protein kinase Chk1 (Fragment) CHEK1	protein serine/threonine kinase activity | protein binding | ATP binding | histone kinase activity (H3-T11 specific) |	DNA damage checkpoint | DNA damage checkpoint | G2/M transition of mitotic cell cycle | DNA replication | DNA repair | cellular response to DNA damage stimulus | DNA damage induced protein phosphorylation | regulation of double-strand break repair via homologous recombination | regulation of transcription from RNA polymerase II promoter in response to UV-induced DNA damage | peptidyl-threonine ph…	chromosome, telomeric region | chromatin | condensed nuclear chromosome | extracellular space | nucleus | nucleoplasm | replication fork | centrosome | cytosol |	E9PRU7	0	401
691	lcl|82719	145	0	POFUT1	GDP-fucose protein O-fucosyltransferase 1	GDP-fucose protein O-fucosyltransferase 1 POFUT1	fucosyltransferase activity | peptide-O-fucosyltransferase activity | peptide-O-fucosyltransferase activity |	angiogenesis | somitogenesis | fucose metabolic process | regulation of transcription, DNA-templated | protein O-linked glycosylation | Notch signaling pathway | Notch signaling pathway | nervous system development | heart development | embryo development | O-glycan processing | protein O-linked fucosylation |	endoplasmic reticulum | membrane |	B4DUV4	0	145
692	lcl|122958	510	0	ZDHHC15	palmitoyltransferase ZDHHC15 isoform 2	palmitoyltransferase ZDHHC15 isoform 2 ZDHHC15	zinc ion binding | palmitoyltransferase activity | protein-cysteine S-palmitoyltransferase activity |	synaptic vesicle maturation | protein palmitoylation | establishment of protein localization |	Golgi apparatus | integral component of membrane |	226342941	4	506
693	lcl|93189	46	0	SCAMP5	Secretory carrier-associated membrane protein 5 (Fragment)	Secretory carrier-associated membrane protein 5 (Fragment) SCAMP5	protein binding |	exocytosis | protein transport | response to endoplasmic reticulum stress | negative regulation of endocytosis | positive regulation of calcium ion-dependent exocytosis | positive regulation of cytokine secretion |	Golgi membrane | plasma membrane | integral component of membrane | cell junction | synaptic vesicle membrane | SNARE complex | trans-Golgi network membrane | recycling endosome membrane |	H3BNH7	4	42
694	lcl|77290	411	0	SAMD12	Sterile alpha motif domain-containing protein 12 (Fragment)	Sterile alpha motif domain-containing protein 12 (Fragment) SAMD12				H0Y632	0	411
695	lcl|51169	135	0	ZFHX2	Zinc finger homeobox protein 2 (Fragment)	Zinc finger homeobox protein 2 (Fragment) ZFHX2	sequence-specific DNA binding transcription factor activity | zinc ion binding | sequence-specific DNA binding |	transcription, DNA-templated | adult behavior |	nucleus |	G3V3N5	12	123
696	lcl|141238	47	0	TMEM175	Transmembrane protein 175 (Fragment)	Transmembrane protein 175 (Fragment) TMEM175			lysosomal membrane | integral component of membrane |	D6RAJ5	0	47
697	lcl|37492	134	0	NDUFC1	Putative uncharacterized protein NDUFC1 (Fragment)	Putative uncharacterized protein NDUFC1 (Fragment) NDUFC1	NADH dehydrogenase (ubiquinone) activity |	mitochondrial electron transport, NADH to ubiquinone | respiratory electron transport chain | cellular metabolic process | small molecule metabolic process |	mitochondrial inner membrane | mitochondrial respiratory chain complex I | integral component of membrane |	Q4W5J3	8	126
698	lcl|151948	2533	0	ZFAT	Zinc finger protein ZFAT	Zinc finger protein ZFAT ZFAT	RNA polymerase II core promoter proximal region sequence-specific DNA binding transcription factor activity involved in positive regulation of transcription | DNA binding | metal ion binding |	hematopoietic progenitor cell differentiation | spongiotrophoblast layer development |	nucleus | cytosol |	F8W7M8	54	2479
699	lcl|56454	286	0	PSMD2	26S proteasome non-ATPase regulatory subunit 2 (Fragment)	26S proteasome non-ATPase regulatory subunit 2 (Fragment) PSMD2	protein binding | enzyme regulator activity |	G1/S transition of mitotic cell cycle | protein polyubiquitination | mitotic cell cycle | antigen processing and presentation of peptide antigen via MHC class I | antigen processing and presentation of exogenous peptide antigen via MHC class I, TAP-dependent | regulation of cellular amino acid metabolic process | apoptotic process | DNA damage response, signal transduction by p53 class mediator r…	proteasome complex | nucleoplasm | cytosol | proteasome regulatory particle | proteasome accessory complex | extracellular vesicular exosome |	C9JPC0	0	286
700	lcl|58585	21	0		PRO0593	PRO0593				Q9UI21	0	21
701	lcl|26645	1470	0	ALDH18A1	delta-1-pyrroline-5-carboxylate synthase isoform 2	delta-1-pyrroline-5-carboxylate synthase isoform 2 ALDH18A1	glutamate 5-kinase activity | glutamate-5-semialdehyde dehydrogenase activity | ATP binding | poly(A) RNA binding |	glutamate metabolic process | proline biosynthetic process | ornithine biosynthetic process | cellular amino acid biosynthetic process | citrulline biosynthetic process | cellular nitrogen compound metabolic process | small molecule metabolic process | L-proline biosynthetic process |	mitochondrial inner membrane |	62912457	52	1418
702	lcl|47813	702	0		cDNA FLJ61605, highly similar to Homo sapiens DALR anticodon binding domain containing 3 (DALRD3), transcript variant 1, mRNA	cDNA FLJ61605, highly similar to Homo sapiens DALR anticodon binding domain containing 3 (DALRD3), transcript variant 1, mRNA				B7Z727	4	698
703	lcl|96944	288	0	TCF19	PREDICTED: transcription factor 19 isoform X4	PREDICTED: transcription factor 19 isoform X4 TCF19	sequence-specific DNA binding transcription factor activity | zinc ion binding |	transcription, DNA-templated | regulation of transcription from RNA polymerase II promoter | cell proliferation |	nucleus |	578840870	2	286
704	lcl|79611	430	0	MBIP	PREDICTED: MAP3K12-binding inhibitory protein 1 isoform X2	PREDICTED: MAP3K12-binding inhibitory protein 1 isoform X2 MBIP	protein kinase inhibitor activity | protein binding | identical protein binding |	inactivation of MAPK activity involved in osmosensory signaling pathway | chromatin organization | histone H3 acetylation |	Ada2/Gcn5/Ada3 transcription activator complex |	530403974	10	420
705	lcl|62955	200	0	CASC2	Protein CASC2, isoforms 1/2	Protein CASC2, isoforms 1/2 CASC2				Q8IU53	18	182
706	lcl|36022	411	0	FHAD1	Forkhead-associated domain-containing protein 1	Forkhead-associated domain-containing protein 1 FHAD1				Q5JYW1	2	409
707	lcl|92065	763	0		cDNA FLJ51391, highly similar to Homeodomain-interacting protein kinase 4 (EC 2.7.11.1)	cDNA FLJ51391, highly similar to Homeodomain-interacting protein kinase 4 (EC 2.7.11.1)				B4DY79	11	752
708	lcl|44427	2813	0	COL25A1	Collagen alpha-1(XXV) chain	Collagen alpha-1(XXV) chain COL25A1	beta-amyloid binding | heparin binding |	extracellular matrix disassembly | extracellular matrix organization | collagen catabolic process |	extracellular region | extracellular region | collagen | extracellular space | endoplasmic reticulum lumen | plasma membrane | integral component of plasma membrane | integral component of membrane |	Q9BXS0 38570075	202	2611
821	lcl|109534	3	0	coxIII	Cytochrome c oxidase subunit 3	Cytochrome c oxidase subunit 3 coxIII				T2HQ00	0	3
822	lcl|122420	1850	0	MLLT4	PREDICTED: afadin isoform X16	PREDICTED: afadin isoform X16 MLLT4	protein binding | protein C-terminus binding | cell adhesion molecule binding |	cell adhesion | signal transduction | cell-cell signaling | cell junction assembly | adherens junction organization | cell-cell junction organization |	cytosol | cell-cell junction | cell-cell adherens junction | apical part of cell |	578812781	64	1786
823	lcl|29432	135	0	SUMO4	Small ubiquitin-related modifier 4	Small ubiquitin-related modifier 4 SUMO4		protein sumoylation |	nucleus |	Q6EEV6	0	135
824	lcl|69818	70	0		Calcium-sensing receptor (Fragment)	Calcium-sensing receptor (Fragment)				A0MJX6	0	70
825	lcl|126153	505	0	FAM118A	PREDICTED: protein FAM118A isoform X11	PREDICTED: protein FAM118A isoform X11 FAM118A			integral component of membrane |	578837290	6	499
826	lcl|145074	1131	0		cDNA, FLJ96812, highly similar to Homo sapiens threonyl-tRNA synthetase (TARS), mRNA	cDNA, FLJ96812, highly similar to Homo sapiens threonyl-tRNA synthetase (TARS), mRNA				B2RDX5	10	1121
827	lcl|12539	492	0	TRIM27	Zinc finger protein RFP	Zinc finger protein RFP TRIM27	nucleic acid binding | DNA binding | transmembrane receptor protein tyrosine kinase activity | ubiquitin-protein ligase activity | protein binding | zinc ion binding | metal ion binding |	negative regulation of transcription from RNA polymerase II promoter | negative regulation of adaptive immune response | transcription, DNA-templated | negative regulation of protein kinase activity | spermatogenesis | cell proliferation | protein ubiquitination | peptidyl-tyrosine phosphorylation | negative regulation of tumor necrosis factor production | negative regulation of viral transcripti…	nucleus | nucleoplasm | cytoplasm | integral component of plasma membrane | membrane | PML body | nuclear membrane |	P14373 5730009	6	486
828	lcl|120135	410	0		HSPC056	HSPC056				Q9NZY0	6	404
829	lcl|4146	305	0	TEF	Thyrotrophic embryonic factor (Fragment)	Thyrotrophic embryonic factor (Fragment) TEF	double-stranded DNA binding | sequence-specific DNA binding transcription factor activity | protein homodimerization activity | sequence-specific DNA binding | protein heterodimerization activity |	transcription, DNA-templated | regulation of transcription from RNA polymerase II promoter | positive regulation of transcription from RNA polymerase II promoter | rhythmic process |	nucleus |	E0ZS57	28	277
830	lcl|24943	608	0	RPH3A	Rabphilin-3A (Fragment)	Rabphilin-3A (Fragment) RPH3A	transporter activity | calcium ion binding | protein binding | calcium-dependent phospholipid binding | Rab GTPase binding |	intracellular protein transport |	synaptic vesicle | membrane | cell junction |	F8VZS2	2	606
1179	lcl|136650	500	0	SERPINF2	alpha-2-antiplasmin isoform b precursor	alpha-2-antiplasmin isoform b precursor SERPINF2	protease binding | endopeptidase inhibitor activity | serine-type endopeptidase inhibitor activity | serine-type endopeptidase inhibitor activity | serine-type endopeptidase inhibitor activity | protein binding | protein homodimerization activity |	regulation of blood vessel size by renin-angiotensin | platelet degranulation | acute-phase response | blood coagulation | response to organic substance | negative regulation of plasminogen activation | negative regulation of endopeptidase activity | regulation of proteolysis | platelet activation | collagen fibril organization | positive regulation of collagen biosynthetic process | fibrinolysis…	extracellular region | extracellular region | fibrinogen complex | extracellular space | extracellular space | cell surface | platelet alpha granule lumen | blood microparticle |	260064050	16	484
1180	lcl|42404	230	0	HLA-A	MHC class I antigen (Fragment)	MHC class I antigen (Fragment) HLA-A	receptor binding | receptor binding | protein binding | peptide antigen binding | peptide antigen binding | peptide antigen binding | poly(A) RNA binding | TAP binding |	positive regulation of T cell mediated cytotoxicity | positive regulation of T cell mediated cytotoxicity | antigen processing and presentation of peptide antigen via MHC class I | antigen processing and presentation of exogenous peptide antigen via MHC class I, TAP-dependent | antigen processing and presentation of exogenous peptide antigen via MHC class I, TAP-independent | antigen processing a…	Golgi membrane | plasma membrane | integral component of plasma membrane | cell surface | ER to Golgi transport vesicle membrane | phagocytic vesicle membrane | early endosome membrane | MHC class I protein complex | MHC class I protein complex | extracellular vesicular exosome | integral component of lumenal side of endoplasmic reticulum membrane |	F6IR57	4	226
1181	lcl|140128	86	0	HLA-B	MHC class I antigen (Fragment)	MHC class I antigen (Fragment) HLA-B	receptor binding | receptor binding | peptide antigen binding | peptide antigen binding | peptide antigen binding | TAP binding | TAP binding |	positive regulation of T cell mediated cytotoxicity | positive regulation of T cell mediated cytotoxicity | antigen processing and presentation of peptide antigen via MHC class I | antigen processing and presentation of peptide antigen via MHC class I | antigen processing and presentation of exogenous peptide antigen via MHC class I, TAP-dependent | antigen processing and presentation of exogenou…	Golgi membrane | plasma membrane | integral component of plasma membrane | cell surface | cell surface | ER to Golgi transport vesicle membrane | membrane | integral component of membrane | phagocytic vesicle membrane | early endosome membrane | MHC class I protein complex | MHC class I protein complex | extracellular vesicular exosome | integral component of lumenal side of endoplasmic reticulum…	R9RUW0	4	82
1182	lcl|69749	117	0	HLA-C	MHC class I antigen (Fragment)	MHC class I antigen (Fragment) HLA-C	receptor binding | peptide antigen binding | peptide antigen binding | peptide antigen binding | TAP binding |	positive regulation of T cell mediated cytotoxicity | antigen processing and presentation of peptide antigen via MHC class I | antigen processing and presentation of exogenous peptide antigen via MHC class I, TAP-dependent | antigen processing and presentation of exogenous peptide antigen via MHC class I, TAP-independent | antigen processing and presentation of endogenous peptide antigen via MHC …	Golgi membrane | extracellular region | plasma membrane | integral component of plasma membrane | cell surface | cell surface | ER to Golgi transport vesicle membrane | phagocytic vesicle membrane | early endosome membrane | MHC class I protein complex | MHC class I protein complex | extracellular vesicular exosome | integral component of lumenal side of endoplasmic reticulum membrane |	D1MDP2	0	117
1183	lcl|147688	378	0	SIRPB1	Signal-regulatory protein beta-1	Signal-regulatory protein beta-1 SIRPB1	protein binding |	signal transduction | cell surface receptor signaling pathway | innate immune response |	plasma membrane | integral component of plasma membrane | integral component of membrane |	O00241 144953876	16	362
1184	lcl|101334	191	0	C4BPA	C4b-binding protein alpha chain (Fragment)	C4b-binding protein alpha chain (Fragment) C4BPA	protein binding | poly(A) RNA binding |	complement activation, classical pathway | regulation of complement activation | innate immune response |	extracellular region | plasma membrane | blood microparticle |	A6PVY5	27	164
1185	lcl|134876	336	0	RCHY1	RING finger and CHY zinc finger domain-containing protein 1 isoform 4	RING finger and CHY zinc finger domain-containing protein 1 isoform 4 RCHY1	p53 binding | ubiquitin-protein ligase activity | receptor binding | protein binding | zinc ion binding | protein homodimerization activity |	protein ubiquitination | positive regulation of protein ubiquitination | positive regulation of proteasomal ubiquitin-dependent protein catabolic process | protein ubiquitination involved in ubiquitin-dependent protein catabolic process | protein autoubiquitination |	ubiquitin ligase complex | nucleus | cytoplasm | nuclear speck |	512749774	2	334
1186	lcl|122696	233	0	JAZF1	Juxtaposed with another zinc finger protein 1 (Fragment)	Juxtaposed with another zinc finger protein 1 (Fragment) JAZF1	nucleic acid binding | transcription corepressor activity | metal ion binding |	negative regulation of transcription from RNA polymerase II promoter | transcription, DNA-templated |	transcriptional repressor complex |	C9JKQ6	10	223
1187	lcl|126202	46	0	HLA-DRB1	MHC class II antigen (Fragment)	MHC class II antigen (Fragment) HLA-DRB1	MHC class II protein complex binding | MHC class II receptor activity | MHC class II receptor activity | peptide antigen binding |	immunoglobulin production involved in immunoglobulin mediated immune response | immunoglobulin production involved in immunoglobulin mediated immune response | inflammatory response to antigenic stimulus | humoral immune response mediated by circulating immunoglobulin | humoral immune response mediated by circulating immunoglobulin | immune response | immune response | detection of bacterium | cy…	Golgi membrane | lysosomal membrane | lysosomal membrane | plasma membrane | integral component of plasma membrane | external side of plasma membrane | ER to Golgi transport vesicle membrane | membrane | transport vesicle membrane | endocytic vesicle membrane | clathrin-coated endocytic vesicle membrane | late endosome membrane | trans-Golgi network membrane | MHC class II protein complex | extra…	G1EMY8 G9HWB7	0	46
1188	lcl|97629	901	0		GPS, PLAT and transmembrane domain-containing protein FLJ00285	GPS, PLAT and transmembrane domain-containing protein FLJ00285				Q6ZNL0	10	891
1987	lcl|5883	31	0		ATP synthase protein 8 (Fragment)	ATP synthase protein 8 (Fragment)				D3WZ01	0	31
1988	lcl|148684	541	0	DVL2	Segment polarity protein dishevelled homolog DVL-2 (Fragment)	Segment polarity protein dishevelled homolog DVL-2 (Fragment) DVL2	signal transducer activity | frizzled binding | protein binding | protein domain specific binding | identical protein binding | protein self-association |	neural tube closure | positive regulation of protein phosphorylation | heart morphogenesis | outflow tract morphogenesis | transcription from RNA polymerase II promoter | segment specification | heart development | Wnt signaling pathway | cell migration in hindbrain | convergent extension involved in neural plate elongation | cellular protein localization | hippo signaling | non-canonical Wnt sig…	nucleus | cytoplasm | cytosol | plasma membrane | cell cortex | clathrin-coated vesicle | cytoplasmic vesicle | apical part of cell | clathrin-coated endocytic vesicle |	I3L2W9	61	480
1989	lcl|53986	1288	0	ZNF718	Zinc finger protein 718	Zinc finger protein 718 ZNF718	DNA binding | metal ion binding |	transcription, DNA-templated | regulation of transcription, DNA-templated |	nucleus |	A8WFQ3 584277041	8	1280
1990	lcl|91519	1024	0		cDNA FLJ43599 fis, clone SMINT2017781, highly similar to PERIPHERIN	cDNA FLJ43599 fis, clone SMINT2017781, highly similar to PERIPHERIN				B3KWQ6	14	1010
1991	lcl|77069	722	0	TFAP2C	Transcription factor AP-2 gamma	Transcription factor AP-2 gamma TFAP2C	RNA polymerase II distal enhancer sequence-specific DNA binding | RNA polymerase II core promoter proximal region sequence-specific DNA binding transcription factor activity involved in positive regulation of transcription | RNA polymerase II core promoter proximal region sequence-specific DNA binding transcription factor activity involved in negative regulation of transcription | DNA binding | s…	negative regulation of transcription from RNA polymerase II promoter | trophectodermal cell differentiation | hair follicle development | keratinocyte development | regulation of transcription from RNA polymerase II promoter | cell-cell signaling | male gonad development | forebrain neuron fate commitment | cerebral cortex development | germ-line stem cell maintenance | somatic stem cell maintena…	nucleus |	Q92754 4507445	4	718
1992	lcl|36789	113	0	EME1	Crossover junction endonuclease EME1	Crossover junction endonuclease EME1 EME1	DNA binding | endonuclease activity | protein binding | metal ion binding |	DNA repair | DNA recombination |	nucleolus |	D6RIT8	0	113
1993	lcl|28050	384	0	RACGAP1	Rac GTPase-activating protein 1 (Fragment)	Rac GTPase-activating protein 1 (Fragment) RACGAP1	GTPase activator activity | GTPase activator activity | protein binding | phosphatidylinositol-3,4,5-trisphosphate binding | microtubule binding | protein kinase binding | alpha-tubulin binding | gamma-tubulin binding | metal ion binding | beta-tubulin binding |	mitotic cytokinesis | mitotic cytokinesis | actomyosin contractile ring assembly | microtubule-based movement | cytokinesis, initiation of separation | small GTPase mediated signal transduction | spermatogenesis | neuroblast proliferation | blood coagulation | sulfate transport | embryo development | antigen processing and presentation of exogenous peptide antigen via MHC class II | positive regu…	acrosomal vesicle | nucleus | cytosol | microtubule | midbody | extrinsic component of cytoplasmic side of plasma membrane | cleavage furrow | spindle midzone | extracellular vesicular exosome | mitotic spindle | mitotic spindle | centralspindlin complex |	F8W1T4	26	358
1994	lcl|115971	105	0	LOXL2	Lysyl oxidase homolog 2 (Fragment)	Lysyl oxidase homolog 2 (Fragment) LOXL2	chromatin binding | transcription corepressor activity | protein-lysine 6-oxidase activity | scavenger receptor activity | copper ion binding | protein binding | electron carrier activity | methylated histone residue binding | oligosaccharide binding |	response to hypoxia | epithelial to mesenchymal transition | endothelial cell proliferation | sprouting angiogenesis | transcription, DNA-templated | cellular protein modification process | cell adhesion | aging | histone modification | protein deamination | collagen fibril organization | positive regulation of chondrocyte differentiation | endothelial cell migration | negative regulation of tran…	basement membrane | extracellular space | nucleus | nucleus | chromosome | membrane |	H0YAP6	0	105
1995	lcl|3688	703	0	ASL	argininosuccinate lyase isoform 2	argininosuccinate lyase isoform 2 ASL	argininosuccinate lyase activity |	urea cycle | urea cycle | internal protein amino acid acetylation | arginine catabolic process | cellular nitrogen compound metabolic process | arginine biosynthetic process via ornithine | small molecule metabolic process |	cytoplasm | cytosol | extracellular vesicular exosome |	68303547	20	683
1996	lcl|76176	588	0	INPP5F	phosphatidylinositide phosphatase SAC2 isoform 2	phosphatidylinositide phosphatase SAC2 isoform 2 INPP5F	phosphoric ester hydrolase activity |	cardiac muscle hypertrophy in response to stress | phosphatidylinositol catabolic process | phosphatidylinositol-mediated signaling | regulation of protein kinase B signaling |		342307080	16	572
1997	lcl|67137	289	0		cDNA FLJ61088, highly similar to Homocysteine-responsive endoplasmic reticulum-resident ubiquitin-like domain member 1 protein	cDNA FLJ61088, highly similar to Homocysteine-responsive endoplasmic reticulum-resident ubiquitin-like domain member 1 protein				B4E3N8	4	285
2038	lcl|32720	466	0		cDNA FLJ50097	cDNA FLJ50097				B4E0G9	4	462
2039	lcl|76858	102	0	HLA-B	MHC class I antigen (Fragment)	MHC class I antigen (Fragment) HLA-B	receptor binding | receptor binding | peptide antigen binding | peptide antigen binding | peptide antigen binding | TAP binding | TAP binding |	positive regulation of T cell mediated cytotoxicity | positive regulation of T cell mediated cytotoxicity | antigen processing and presentation of peptide antigen via MHC class I | antigen processing and presentation of peptide antigen via MHC class I | antigen processing and presentation of exogenous peptide antigen via MHC class I, TAP-dependent | antigen processing and presentation of exogenou…	Golgi membrane | plasma membrane | integral component of plasma membrane | cell surface | cell surface | ER to Golgi transport vesicle membrane | membrane | integral component of membrane | phagocytic vesicle membrane | early endosome membrane | MHC class I protein complex | MHC class I protein complex | extracellular vesicular exosome | integral component of lumenal side of endoplasmic reticulum…	F2X673	0	102
2040	lcl|104770	545	0	FGFBP1	Fibroblast growth factor-binding protein 1	Fibroblast growth factor-binding protein 1 FGFBP1	protein binding | heparin binding | fibroblast growth factor binding |	signal transduction | cell-cell signaling | positive regulation of cell proliferation | negative regulation of cell proliferation | positive regulation of fibroblast growth factor receptor signaling pathway |	extracellular space | plasma membrane | cell surface |	Q14512 4826754	4	541
2041	lcl|97123	1020	0	CRNKL1	crooked neck-like protein 1 isoform c	crooked neck-like protein 1 isoform c CRNKL1	RNA binding | protein binding | poly(A) RNA binding |	spliceosomal complex assembly | mRNA splicing, via spliceosome |	spliceosomal complex | cytoplasm | nuclear speck | catalytic step 2 spliceosome |	520975430 520975425	8	1012
2042	lcl|87717	341	0	DHX34	Probable ATP-dependent RNA helicase DHX34 (Fragment)	Probable ATP-dependent RNA helicase DHX34 (Fragment) DHX34	ATP binding | ATP-dependent helicase activity | poly(A) RNA binding |	nuclear-transcribed mRNA catabolic process | negative regulation of nuclear-transcribed mRNA catabolic process, nonsense-mediated decay |	cellular_component |	H7C504	6	335
2043	lcl|65741	132	0	HLA-B	MHC class I antigen (Fragment)	MHC class I antigen (Fragment) HLA-B	receptor binding | receptor binding | peptide antigen binding | peptide antigen binding | peptide antigen binding | TAP binding | TAP binding |	positive regulation of T cell mediated cytotoxicity | positive regulation of T cell mediated cytotoxicity | antigen processing and presentation of peptide antigen via MHC class I | antigen processing and presentation of peptide antigen via MHC class I | antigen processing and presentation of exogenous peptide antigen via MHC class I, TAP-dependent | antigen processing and presentation of exogenou…	Golgi membrane | plasma membrane | integral component of plasma membrane | cell surface | cell surface | ER to Golgi transport vesicle membrane | membrane | integral component of membrane | phagocytic vesicle membrane | early endosome membrane | MHC class I protein complex | MHC class I protein complex | extracellular vesicular exosome | integral component of lumenal side of endoplasmic reticulum…	B2CYA0	0	132
2044	lcl|156884	97	0	LOC101926966	Protein LOC101926966 (Fragment)	Protein LOC101926966 (Fragment) LOC101926966				H7C198	0	97
2045	lcl|154122	1206	0		cDNA FLJ55968, highly similar to Adenylate cyclase type 5 (EC 4.6.1.1)	cDNA FLJ55968, highly similar to Adenylate cyclase type 5 (EC 4.6.1.1)				B7Z2C7	16	1190
2046	lcl|135281	215	0	YIPF1	Protein YIPF1 (Fragment)	Protein YIPF1 (Fragment) YIPF1			integral component of membrane | transport vesicle |	C9JFB2	0	215
2047	lcl|119581	127	0	ARL13B	ADP-ribosylation factor-like protein 13B	ADP-ribosylation factor-like protein 13B ARL13B	protein binding | GTP binding |	smoothened signaling pathway | small GTPase mediated signal transduction | determination of left/right symmetry | dorsal/ventral pattern formation | neural tube patterning | interneuron migration from the subpallium to the cortex | formation of radial glial scaffolds | nonmotile primary cilium assembly | cilium assembly |	intracellular | cilium | ciliary membrane | primary cilium |	F8WAY0	0	127
2048	lcl|1395	346	0		cDNA FLJ51753, highly similar to Transmembrane protease, serine 4 (EC 3.4.21.-)	cDNA FLJ51753, highly similar to Transmembrane protease, serine 4 (EC 3.4.21.-)				B7Z8X1	12	334
2142	lcl|75458	187	0	NUP85	Nuclear pore complex protein Nup85 (Fragment)	Nuclear pore complex protein Nup85 (Fragment) NUP85	protein binding |	mitotic cell cycle | carbohydrate metabolic process | mitotic nuclear envelope disassembly | hexose transport | regulation of glucose transport | protein transport | glucose transport | viral process | cytokine-mediated signaling pathway | lamellipodium assembly | small molecule metabolic process | macrophage chemotaxis | mRNA transport | transmembrane transport |	kinetochore | condensed chromosome kinetochore | nuclear envelope | spindle | cytosol | nuclear pore outer ring | nuclear pore outer ring | nuclear membrane |	J3QLV0	6	181
2143	lcl|86653	431	0	TCF19	Transcription factor 19	Transcription factor 19 TCF19	sequence-specific DNA binding transcription factor activity | zinc ion binding |	transcription, DNA-templated | regulation of transcription from RNA polymerase II promoter | cell proliferation |	nucleus |	Q9Y242 530382466 117414152 117414156	6	425
2144	lcl|27207	175	0	HLA-A	MHC class I antigen (Fragment)	MHC class I antigen (Fragment) HLA-A	receptor binding | receptor binding | protein binding | peptide antigen binding | peptide antigen binding | peptide antigen binding | poly(A) RNA binding | TAP binding |	positive regulation of T cell mediated cytotoxicity | positive regulation of T cell mediated cytotoxicity | antigen processing and presentation of peptide antigen via MHC class I | antigen processing and presentation of exogenous peptide antigen via MHC class I, TAP-dependent | antigen processing and presentation of exogenous peptide antigen via MHC class I, TAP-independent | antigen processing a…	Golgi membrane | plasma membrane | integral component of plasma membrane | cell surface | ER to Golgi transport vesicle membrane | phagocytic vesicle membrane | early endosome membrane | MHC class I protein complex | MHC class I protein complex | extracellular vesicular exosome | integral component of lumenal side of endoplasmic reticulum membrane |	F2XI36	0	175
2145	lcl|129592	583	0	CPEB4	PREDICTED: cytoplasmic polyadenylation element-binding protein 4 isoform X1	PREDICTED: cytoplasmic polyadenylation element-binding protein 4 isoform X1 CPEB4	nucleotide binding | protein binding | poly(A) RNA binding |	response to ischemia | ionotropic glutamate receptor signaling pathway | cellular response to decreased oxygen levels | cellular response to glucose starvation | negative regulation of neuron apoptotic process | cellular response to amino acid stimulus |	nucleus | nucleus | cytoplasm | cytoplasm | endoplasmic reticulum | postsynaptic density | dendrite |	530381217	10	573
2146	lcl|79408	592	0		cDNA FLJ77979	cDNA FLJ77979				A8K3D4	0	592
2147	lcl|41352	140	0	C1orf222	Uncharacterized protein C1orf222 (Fragment)	Uncharacterized protein C1orf222 (Fragment) C1orf222				H7C4J0	8	132
2148	lcl|94733	445	0		CD81 antigen variant (Fragment)	CD81 antigen variant (Fragment)				Q59FS9	0	445
2149	lcl|37652	10	0	TP53BP1	Tumor suppressor p53-binding protein 1 (Fragment)	Tumor suppressor p53-binding protein 1 (Fragment) TP53BP1	RNA polymerase II activating transcription factor binding | RNA polymerase II transcription cofactor activity | p53 binding | damaged DNA binding | protein binding | methylated histone residue binding | telomeric DNA binding |	double-strand break repair via homologous recombination | DNA repair | double-strand break repair | transcription from RNA polymerase II promoter | cellular response to DNA damage stimulus | positive regulation of transcription, DNA-templated | positive regulation of transcription from RNA polymerase II promoter | positive regulation of sequence-specific DNA binding transcription factor activity |	condensed chromosome kinetochore | chromosome, telomeric region | nucleoplasm | replication fork | cytoplasm |	Q3YL84	0	10
2150	lcl|57044	1516	0	APBB1	PREDICTED: amyloid beta A4 precursor protein-binding family B member 1 isoform X8	PREDICTED: amyloid beta A4 precursor protein-binding family B member 1 isoform X8 APBB1	beta-amyloid binding | beta-amyloid binding | chromatin binding | protein binding | transcription factor binding | histone binding | proline-rich region binding |	neuron migration | double-strand break repair | transcription, DNA-templated | regulation of transcription, DNA-templated | apoptotic process | cellular response to DNA damage stimulus | cell cycle arrest | signal transduction | axonogenesis | axon guidance | visual learning | extracellular matrix organization | negative regulation of cell growth | positive regulation of apoptotic process | histo…	nucleus | nucleus | cytoplasm | plasma membrane | nuclear speck | lamellipodium | growth cone | synapse |	578820496	42	1474
2151	lcl|97214	175	0	NUMA1	Nuclear mitotic apparatus protein 1 (Fragment)	Nuclear mitotic apparatus protein 1 (Fragment) NUMA1	structural molecule activity | protein binding | microtubule binding |	G2/M transition of mitotic cell cycle | mitotic anaphase | establishment of mitotic spindle orientation | mitotic cell cycle | nucleus organization | mitosis | meiotic cell cycle | lung epithelial cell differentiation |	spindle pole | nucleoplasm | chromosome | spindle | cytosol | spindle microtubule | nuclear matrix | dendrite | neuronal cell body | apical part of cell |	F5H763	0	175
2152	lcl|148930	1921	0	FN1	PREDICTED: fibronectin isoform X1	PREDICTED: fibronectin isoform X1 FN1	protease binding | integrin binding | protein binding | collagen binding | heparin binding | peptidase activator activity |	angiogenesis | platelet degranulation | acute-phase response | cell-substrate junction assembly | cell adhesion | calcium-independent cell-matrix adhesion | blood coagulation | regulation of cell shape | response to wounding | peptide cross-linking | extracellular matrix disassembly | platelet activation | extracellular matrix organization | substrate adhesion-dependent cell spreading | leukocyte…	extracellular region | extracellular region | fibrinogen complex | basement membrane | extracellular space | endoplasmic reticulum-Golgi intermediate compartment | apical plasma membrane | extracellular matrix | extracellular matrix | extracellular matrix | platelet alpha granule lumen | extracellular vesicular exosome | blood microparticle |	530370025	18	1903
2195	lcl|58952	150	0	HLA-C	MHC class I antigen (Fragment)	MHC class I antigen (Fragment) HLA-C	receptor binding | peptide antigen binding | peptide antigen binding | peptide antigen binding | TAP binding |	positive regulation of T cell mediated cytotoxicity | antigen processing and presentation of peptide antigen via MHC class I | antigen processing and presentation of exogenous peptide antigen via MHC class I, TAP-dependent | antigen processing and presentation of exogenous peptide antigen via MHC class I, TAP-independent | antigen processing and presentation of endogenous peptide antigen via MHC …	Golgi membrane | extracellular region | plasma membrane | integral component of plasma membrane | cell surface | cell surface | ER to Golgi transport vesicle membrane | phagocytic vesicle membrane | early endosome membrane | MHC class I protein complex | MHC class I protein complex | extracellular vesicular exosome | integral component of lumenal side of endoplasmic reticulum membrane |	D2DKH0 F8SY68 G0Z8D9	0	150
2196	lcl|17243	436	0	TM2D3	TM2 domain-containing protein 3 isoform b precursor	TM2 domain-containing protein 3 isoform b precursor TM2D3			integral component of membrane |	91807119	6	430
2197	lcl|4853	188	0	AOF1	AOF1 protein	AOF1 protein AOF1				Q08EI0	4	184
2198	lcl|143074	8	0	PIH4	Pregnancy-induced hypertension syndrome-related protein 4 (Fragment)	Pregnancy-induced hypertension syndrome-related protein 4 (Fragment) PIH4				Q96KE2	0	8
2199	lcl|25809	659	0	SNAP91	PREDICTED: clathrin coat assembly protein AP180 isoform X6	PREDICTED: clathrin coat assembly protein AP180 isoform X6 SNAP91	protein binding | 1-phosphatidylinositol binding | clathrin binding |	protein transport | clathrin coat assembly |	plasma membrane | coated pit | clathrin coat |	578813117	16	643
2200	lcl|108448	434	0	DRD4	D(4) dopamine receptor	D(4) dopamine receptor DRD4	dopamine neurotransmitter receptor activity, coupled via Gi/Go | dopamine neurotransmitter receptor activity, coupled via Gi/Go | dopamine neurotransmitter receptor activity | protein binding | drug binding | potassium channel regulator activity | SH3 domain binding | dopamine binding | identical protein binding |	activation of MAPK activity | behavioral fear response | synaptic transmission, dopaminergic | response to amphetamine | cellular calcium ion homeostasis | negative regulation of adenylate cyclase activity | adenylate cyclase-inhibiting dopamine receptor signaling pathway | dopamine receptor signaling pathway | short-term memory | circadian rhythm | adult locomotory behavior | olfactory learning …	plasma membrane | integral component of plasma membrane | cell cortex | vesicle membrane | membrane | neuronal cell body | terminal bouton | dendritic spine |	P21917	52	382
2201	lcl|85384	391	0		cDNA FLJ58970, highly similar to Homo sapiens SYF2 homolog, RNA splicing factor (SYF2), transcript variant 1, mRNA	cDNA FLJ58970, highly similar to Homo sapiens SYF2 homolog, RNA splicing factor (SYF2), transcript variant 1, mRNA				B4E0Y8	16	375
2202	lcl|82585	47	0	DKFZp686B15117	Putative uncharacterized protein DKFZp686B15117	Putative uncharacterized protein DKFZp686B15117 DKFZp686B15117				Q6MZI1	0	47
2203	lcl|123237	389	0	LOC101930405	PREDICTED: uncharacterized protein LOC101930405	PREDICTED: uncharacterized protein LOC101930405 LOC101930405				530356052	4	385
2204	lcl|49041	239	0	LOC102724031	PREDICTED: ribosome biogenesis protein BMS1 homolog	PREDICTED: ribosome biogenesis protein BMS1 homolog LOC102724031				578839162	8	231
2205	lcl|48374	671	0	NACAD	PREDICTED: NAC-alpha domain-containing protein 1 isoform X1	PREDICTED: NAC-alpha domain-containing protein 1 isoform X1 NACAD		protein transport |	nucleus | cytoplasm |	578813371	20	651
2514	lcl|59229	1953	0	DLG1	disks large homolog 1 isoform 4	disks large homolog 1 isoform 4 DLG1	guanylate kinase activity | phosphoprotein phosphatase activity | protein binding | protein C-terminus binding | cytoskeletal protein binding | potassium channel regulator activity | potassium channel regulator activity | protein kinase binding | phosphatase binding | mitogen-activated protein kinase kinase binding | protein complex scaffold | ion channel binding | L27 domain binding |	branching involved in ureteric bud morphogenesis | immunological synapse formation | endothelial cell proliferation | lens development in camera-type eye | T cell cytokine production | actin filament organization | mitotic cell cycle checkpoint | establishment or maintenance of cell polarity | synaptic transmission | axon guidance | positive regulation of cell proliferation | viral process | deph…	immunological synapse | nucleus | cytoplasm | endoplasmic reticulum | endoplasmic reticulum membrane | Golgi apparatus | cytosol | microtubule | plasma membrane | cell-cell junction | tight junction | cytoplasmic side of plasma membrane | postsynaptic density | intercalated disc | basolateral plasma membrane | lateral plasma membrane | cell junction | cell projection membrane | neuromuscular junc…	324120934	8	1945
2515	lcl|7436	1304	0	RUFY2	PREDICTED: RUN and FYVE domain-containing protein 2 isoform X3	PREDICTED: RUN and FYVE domain-containing protein 2 isoform X3 RUFY2	metal ion binding |		nucleus |	530393943	2	1302
2516	lcl|53716	1158	0	HEPH	hephaestin isoform a	hephaestin isoform a HEPH	ferroxidase activity | copper ion binding | ferrous iron binding |	copper ion transport | iron ion transport | cellular iron ion homeostasis | transmembrane transport |	intracellular | plasma membrane | integral component of membrane | basolateral plasma membrane | perinuclear region of cytoplasm |	281485618	16	1142
2517	lcl|70987	31	0	SLC37A3	Sugar phosphate exchanger 3 (Fragment)	Sugar phosphate exchanger 3 (Fragment) SLC37A3	transporter activity |	carbohydrate transport | transmembrane transport |	integral component of membrane |	H7C594	0	31
2518	lcl|64734	1412	0	DKFZp781A0353	Putative uncharacterized protein DKFZp781A0353 (Fragment)	Putative uncharacterized protein DKFZp781A0353 (Fragment) DKFZp781A0353				Q68DE6	22	1390
2519	lcl|149308	915	0	HEPH	PREDICTED: hephaestin isoform X1	PREDICTED: hephaestin isoform X1 HEPH	ferroxidase activity | copper ion binding | ferrous iron binding |	copper ion transport | iron ion transport | cellular iron ion homeostasis | transmembrane transport |	intracellular | plasma membrane | integral component of membrane | basolateral plasma membrane | perinuclear region of cytoplasm |	578838553	16	899
2520	lcl|43376	338	0		cDNA, FLJ96160, highly similar to Homo sapiens EGF-containing fibulin-like extracellular matrix protein 2 (EFEMP2), mRNA	cDNA, FLJ96160, highly similar to Homo sapiens EGF-containing fibulin-like extracellular matrix protein 2 (EFEMP2), mRNA				B2RCM5	2	336
2521	lcl|101435	274	0	TBRG1	Transforming growth factor beta regulator 1 (Fragment)	Transforming growth factor beta regulator 1 (Fragment) TBRG1	protein binding |	DNA replication | cell cycle arrest | negative regulation of cell proliferation | nucleolus to nucleoplasm transport | protein stabilization |	nucleus |	E9PK87	20	254
2522	lcl|126731	84	0	CD59	CD59 glycoprotein	CD59 glycoprotein CD59	complement binding | protein binding |	cell activation | negative regulation of activation of membrane attack complex | cell surface receptor signaling pathway | blood coagulation | regulation of complement activation | positive regulation of T cell proliferation | negative regulation of apoptotic process | innate immune response |	extracellular region | extracellular space | plasma membrane | cell surface | membrane | anchored component of external side of plasma membrane | sarcolemma | compact myelin | extracellular vesicular exosome |	E9PNW4	0	84
2523	lcl|9136	30	0	CYTB	Cytochrome b	Cytochrome b CYTB				F5GSU4	4	26
709	lcl|85290	307	0	KIAA1257	PREDICTED: uncharacterized protein KIAA1257 isoform X4	PREDICTED: uncharacterized protein KIAA1257 isoform X4 KIAA1257				530375061	16	291
710	lcl|157980	440	0	MBNL1	PREDICTED: muscleblind-like protein 1 isoform X5	PREDICTED: muscleblind-like protein 1 isoform X5 MBNL1	RNA binding | double-stranded RNA binding | protein binding | poly(A) RNA binding | metal ion binding |	alternative mRNA splicing, via spliceosome | regulation of alternative mRNA splicing, via spliceosome | in utero embryonic development | mRNA splice site selection | nervous system development | skeletal muscle tissue development | RNA splicing | embryonic limb morphogenesis | regulation of RNA splicing | myoblast differentiation |	nucleus | cytoplasm | cytoplasmic stress granule |	530374632	0	440
711	lcl|135035	399	0	NR1H2	Oxysterols receptor LXR-beta (Fragment)	Oxysterols receptor LXR-beta (Fragment) NR1H2	sequence-specific transcription regulatory region DNA binding RNA polymerase II transcription factor recruiting transcription factor activity | DNA binding | steroid hormone receptor activity | ligand-activated sequence-specific DNA binding RNA polymerase II transcription factor activity | protein binding | zinc ion binding | sequence-specific DNA binding | retinoid X receptor binding |	negative regulation of transcription from RNA polymerase II promoter | transcription initiation from RNA polymerase II promoter | gene expression | negative regulation of macrophage derived foam cell differentiation | positive regulation of triglyceride biosynthetic process | positive regulation of cholesterol efflux | positive regulation of lipid storage | negative regulation of cholesterol stor…	nucleus | nucleoplasm | cytoplasm |	M0QYE6	8	391
712	lcl|134101	427	0	BATF2	Basic leucine zipper transcriptional factor ATF-like 2	Basic leucine zipper transcriptional factor ATF-like 2 BATF2	sequence-specific DNA binding transcription factor activity | protein binding | sequence-specific DNA binding |	transcription, DNA-templated | defense response to protozoan | myeloid dendritic cell differentiation |	nucleus |	B4DV37	4	423
713	lcl|126636	961	0	BBS7	Bardet-Biedl syndrome 7 protein isoform b	Bardet-Biedl syndrome 7 protein isoform b BBS7	RNA polymerase II repressing transcription factor binding | protein binding |	eye development | heart looping | regulation of transcription from RNA polymerase II promoter | smoothened signaling pathway | determination of left/right symmetry | brain development | visual perception | protein transport | melanosome transport | positive regulation of proteasomal ubiquitin-dependent protein catabolic process | nonmotile primary cilium assembly | fat cell differentiation | dige…	cytoplasm | centrosome | BBSome | ciliary membrane |	29029555	15	946
714	lcl|80796	375	0		Matrix metalloproteinase 1 preproprotein variant (Fragment)	Matrix metalloproteinase 1 preproprotein variant (Fragment)				Q53G97	0	375
715	lcl|73802	141	0	HLA-C	MHC class I antigen (Fragment)	MHC class I antigen (Fragment) HLA-C	receptor binding | peptide antigen binding | peptide antigen binding | peptide antigen binding | TAP binding |	positive regulation of T cell mediated cytotoxicity | antigen processing and presentation of peptide antigen via MHC class I | antigen processing and presentation of exogenous peptide antigen via MHC class I, TAP-dependent | antigen processing and presentation of exogenous peptide antigen via MHC class I, TAP-independent | antigen processing and presentation of endogenous peptide antigen via MHC …	Golgi membrane | extracellular region | plasma membrane | integral component of plasma membrane | cell surface | cell surface | ER to Golgi transport vesicle membrane | phagocytic vesicle membrane | early endosome membrane | MHC class I protein complex | MHC class I protein complex | extracellular vesicular exosome | integral component of lumenal side of endoplasmic reticulum membrane |	R4QGH9	0	141
716	lcl|111306	1569	0	EPHA5	ephrin type-A receptor 5 isoform b	ephrin type-A receptor 5 isoform b EPHA5	ephrin receptor activity | GPI-linked ephrin receptor activity | transmembrane-ephrin receptor activity | ATP binding |	axon guidance | cAMP-mediated signaling | hippocampus development | regulation of Rac GTPase activity | positive regulation of CREB transcription factor activity | regulation of actin cytoskeleton organization | ephrin receptor signaling pathway | neuron development | negative regulation of synapse assembly | regulation of insulin secretion involved in cellular response to glucose stimulus |	rough endoplasmic reticulum | plasma membrane | integral component of plasma membrane | external side of plasma membrane | axon | dendrite | neuronal cell body | perinuclear region of cytoplasm |	221625422	18	1551
717	lcl|19139	1208	0	ROBO4	Roundabout homolog 4	Roundabout homolog 4 ROBO4	receptor activity |	angiogenesis | cell differentiation | regulation of cell migration | negative regulation of cell migration |	external side of plasma membrane | integral component of membrane |	Q8WZ75 17511435	56	1152
718	lcl|93859	905	0	AASDH	Acyl-CoA synthetase family member 4	Acyl-CoA synthetase family member 4 AASDH	ATP binding | acid-thiol ligase activity |	fatty acid metabolic process |		R4GNB1 530376754	26	879
719	lcl|100135	508	0	MBTD1	Alternative protein MBTD1	Alternative protein MBTD1 MBTD1	zinc ion binding |	transcription, DNA-templated | regulation of transcription, DNA-templated | chromatin modification | embryonic skeletal system development |	nucleus |	L8E9Z6	2	506
720	lcl|29113	456	0	ASB7	Ankyrin repeat and SOCS box protein 7	Ankyrin repeat and SOCS box protein 7 ASB7		protein ubiquitination | intracellular signal transduction |		Q9H672 38176283	8	448
721	lcl|59298	383	0	KIR3DL2	KIR3DL2 (Fragment)	KIR3DL2 (Fragment) KIR3DL2		cellular defense response | regulation of immune response |	plasma membrane | integral component of plasma membrane |	E4W3V0	2	381
722	lcl|60332	321	0		cDNA FLJ12559 fis, clone NT2RM4000795, highly similar to Neuroligin-4, X-linked	cDNA FLJ12559 fis, clone NT2RM4000795, highly similar to Neuroligin-4, X-linked				B3KMT6	8	313
723	lcl|112572	425	0	PDP2	[Pyruvate dehydrogenase [acetyl-transferring]]-phosphatase 2, mitochondrial	[Pyruvate dehydrogenase [acetyl-transferring]]-phosphatase 2, mitochondrial PDP2	magnesium-dependent protein serine/threonine phosphatase activity | [pyruvate dehydrogenase (lipoamide)] phosphatase activity | metal ion binding |	pyruvate metabolic process | regulation of acetyl-CoA biosynthetic process from pyruvate | peptidyl-threonine dephosphorylation | cellular metabolic process | small molecule metabolic process |	mitochondrial matrix |	Q9P2J9 530424144 530424146 530424150 530424148 530424152 41349497	0	425
724	lcl|131149	1180	0	NR3C1	Glucocorticoid receptor	Glucocorticoid receptor NR3C1	sequence-specific DNA binding transcription factor activity | glucocorticoid receptor activity | steroid binding | protein binding | zinc ion binding | sequence-specific DNA binding | protein dimerization activity |	regulation of gluconeogenesis | transcription, DNA-templated | regulation of transcription, DNA-templated | transcription from RNA polymerase II promoter | transcription initiation from RNA polymerase II promoter | signal transduction | glucocorticoid metabolic process | gene expression | chromatin modification | adrenal gland development | regulation of glucocorticoid biosynthetic process | posi…	nucleoplasm | mitochondrial matrix | cytosol | membrane |	E5KQF5 66528642	4	1176
725	lcl|127797	54	0	KCNE4	Cardiac voltage-gated potassium channel accessory subunit 4 (Fragment)	Cardiac voltage-gated potassium channel accessory subunit 4 (Fragment) KCNE4	voltage-gated potassium channel activity |		integral component of membrane | apical plasma membrane |	Q2N1I0	8	46
726	lcl|87088	417	0	PDIA4	Protein disulfide-isomerase A4 (Fragment)	Protein disulfide-isomerase A4 (Fragment) PDIA4	protein disulfide isomerase activity | protein disulfide isomerase activity | protein binding | protein disulfide oxidoreductase activity | poly(A) RNA binding |	protein folding | glycerol ether metabolic process | protein secretion | response to endoplasmic reticulum stress | cell redox homeostasis | chaperone-mediated protein folding |	endoplasmic reticulum | endoplasmic reticulum lumen | cell surface | melanosome |	C9JMN9	0	417
727	lcl|24519	681	0	SGOL1	shugoshin-like 1 isoform B2	shugoshin-like 1 isoform B2 SGOL1	protein binding | kinase binding |	mitotic cell cycle | chromosome segregation | mitosis | attachment of spindle microtubules to kinetochore | centriole-centriole cohesion | centriole-centriole cohesion | meiotic chromosome segregation |	chromosome, centromeric region | kinetochore | kinetochore | condensed chromosome kinetochore | condensed chromosome, centromeric region | condensed nuclear chromosome, centromeric region | spindle pole | centrosome | cytosol | mitotic cohesin complex |	312922339 60302873	16	665
728	lcl|94142	213	0	p16ink4a	p16-ACT fusion protein	p16-ACT fusion protein p16ink4a				R9S252	8	205
729	lcl|153783	32	0	DPM2	Dolichol phosphate-mannose biosynthesis regulatory protein	Dolichol phosphate-mannose biosynthesis regulatory protein DPM2	dolichyl-phosphate beta-D-mannosyltransferase activity | protein binding | enzyme regulator activity |	dolichol-linked oligosaccharide biosynthetic process | C-terminal protein lipidation | GPI anchor biosynthetic process | preassembly of GPI anchor in ER membrane | protein N-linked glycosylation via asparagine | dolichol metabolic process | regulation of protein stability | protein O-linked mannosylation | post-translational protein modification | cellular protein metabolic process |	glycosylphosphatidylinositol-N-acetylglucosaminyltransferase (GPI-GnT) complex | glycosylphosphatidylinositol-N-acetylglucosaminyltransferase (GPI-GnT) complex | endoplasmic reticulum membrane | integral component of endoplasmic reticulum membrane | dolichol-phosphate-mannose synthase complex | perinuclear region of cytoplasm |	O94777 4503365	0	32
730	lcl|89344	48	0	HLA-DR4I	MHC class II antigen (Fragment)	MHC class II antigen (Fragment) HLA-DR4I				G1EN22	0	48
731	lcl|28440	1214	0	IFT88	PREDICTED: intraflagellar transport protein 88 homolog isoform X3	PREDICTED: intraflagellar transport protein 88 homolog isoform X3 IFT88		eye development | in utero embryonic development | epithelial cell morphogenesis | smoothened signaling pathway | determination of left/right symmetry | protein localization | anterior/posterior pattern specification | protein processing | spinal cord dorsal/ventral patterning | telencephalon development | regulation of odontogenesis of dentin-containing tooth | embryonic digit morphogenesis | po…	centriole | cilium | axoneme | intraciliary transport particle B | motile primary cilium | motile cilium | photoreceptor connecting cilium | ciliary basal body | apical part of cell |	530402696	24	1190
732	lcl|136746	627	0	ATXN10	Ataxin-10	Ataxin-10 ATXN10	protein binding | identical protein binding |	nervous system development | cell death | neuron projection development |	extracellular space | cytoplasm | cytosol | dendrite | neuronal cell body | perinuclear region of cytoplasm |	Q9UBB4 7106299	6	621
733	lcl|43352	137	0	HSPG2	Endorepellin (Fragment)	Endorepellin (Fragment) HSPG2	protein binding | protein C-terminus binding | metal ion binding |	retinoid metabolic process | angiogenesis | endochondral ossification | chondrocyte differentiation | carbohydrate metabolic process | glycosaminoglycan biosynthetic process | glycosaminoglycan catabolic process | brain development | phototransduction, visible light | protein localization | extracellular matrix disassembly | extracellular matrix organization | glycosaminoglycan metabolic process …	extracellular region | basal lamina | extracellular space | Golgi lumen | plasma membrane | extracellular matrix | extracellular matrix | lysosomal lumen | extracellular vesicular exosome |	Q5SZJ2	8	129
734	lcl|58662	16	0	DONSON	Protein downstream neighbor of Son (Fragment)	Protein downstream neighbor of Son (Fragment) DONSON	molecular_function |	multicellular organismal development | biological_process |	cellular_component | nucleus |	V9GY84	0	16
735	lcl|11801	14	0	TAOK3	Serine/threonine-protein kinase TAO3 (Fragment)	Serine/threonine-protein kinase TAO3 (Fragment) TAOK3	protein serine/threonine kinase activity | MAP kinase kinase kinase activity | protein kinase inhibitor activity | protein binding | ATP binding | transferase activity |	MAPK cascade | activation of MAPKK activity | DNA repair | protein phosphorylation | protein phosphorylation | negative regulation of protein kinase activity | cellular response to DNA damage stimulus | G2 DNA damage checkpoint | positive regulation of stress-activated MAPK cascade | positive regulation of JUN kinase activity | negative regulation of JNK cascade | positive regulation of JNK casca…	cytoplasm | plasma membrane |	F5H1I2	0	14
736	lcl|21617	98	0	ZNF521	Zinc finger protein 521 (Fragment)	Zinc finger protein 521 (Fragment) ZNF521	DNA binding | protein domain specific binding | metal ion binding |	transcription, DNA-templated | regulation of transcription, DNA-templated | multicellular organismal development | cell differentiation |	nucleus |	J3KT07	0	98
737	lcl|2421	619	0	HEXDC	Hexosaminidase D	Hexosaminidase D HEXDC	beta-N-acetylhexosaminidase activity |	carbohydrate metabolic process |	nucleus | cytoplasm |	J3QKL0	8	611
738	lcl|41009	1147	0		cDNA FLJ54264, highly similar to Exocyst complex component 5	cDNA FLJ54264, highly similar to Exocyst complex component 5				B4E0U7	28	1119
739	lcl|14653	116	0	NOVA1	RNA-binding protein Nova-1 (Fragment)	RNA-binding protein Nova-1 (Fragment) NOVA1	RNA binding | mRNA binding | poly(A) RNA binding |	mRNA splicing, via spliceosome | RNA processing | synaptic transmission | locomotory behavior | RNA splicing |		F8VW64	0	116
740	lcl|137585	87	0	HLA-A	MHC class I antigen (Fragment)	MHC class I antigen (Fragment) HLA-A	receptor binding | receptor binding | protein binding | peptide antigen binding | peptide antigen binding | peptide antigen binding | poly(A) RNA binding | TAP binding |	positive regulation of T cell mediated cytotoxicity | positive regulation of T cell mediated cytotoxicity | antigen processing and presentation of peptide antigen via MHC class I | antigen processing and presentation of exogenous peptide antigen via MHC class I, TAP-dependent | antigen processing and presentation of exogenous peptide antigen via MHC class I, TAP-independent | antigen processing a…	Golgi membrane | plasma membrane | integral component of plasma membrane | cell surface | ER to Golgi transport vesicle membrane | phagocytic vesicle membrane | early endosome membrane | MHC class I protein complex | MHC class I protein complex | extracellular vesicular exosome | integral component of lumenal side of endoplasmic reticulum membrane |	Q6L625	0	87
741	lcl|152254	981	0		cDNA FLJ54644	cDNA FLJ54644				B4DZP6	112	869
742	lcl|15574	867	0	CNOT10	CCR4-NOT transcription complex subunit 10 isoform 2	CCR4-NOT transcription complex subunit 10 isoform 2 CNOT10	protein binding |	nuclear-transcribed mRNA catabolic process, deadenylation-dependent decay | nuclear-transcribed mRNA poly(A) tail shortening | transcription, DNA-templated | regulation of transcription, DNA-templated | regulation of translation | gene expression | RNA metabolic process | mRNA metabolic process | gene silencing by RNA |	nucleus | cytosol | CCR4-NOT complex |	376319247	8	859
743	lcl|55298	578	0	CTBP2	CTBP2 protein	CTBP2 protein CTBP2	transcription corepressor activity | protein binding | oxidoreductase activity, acting on the CH-OH group of donors, NAD or NADP as acceptor | NAD binding |	transcription, DNA-templated | negative regulation of cell proliferation | viral genome replication | negative regulation of transcription, DNA-templated | white fat cell differentiation |	nucleus | nucleus | transcriptional repressor complex | cell junction | synapse |	Q8IY44	6	572
744	lcl|83455	275	0	DNAJB14	DnaJ homolog subfamily B member 14	DnaJ homolog subfamily B member 14 DNAJB14			integral component of membrane |	F2Z2L8	0	275
745	lcl|60660	108	0		Lipoprotein lipase (Fragment)	Lipoprotein lipase (Fragment)				Q4JIZ7	0	108
746	lcl|129757	53	0	TUBB6	Tubulin beta-6 chain	Tubulin beta-6 chain TUBB6	molecular_function | GTPase activity | structural constituent of cytoskeleton | GTP binding |	protein folding | microtubule-based process | cellular protein metabolic process | 'de novo' posttranslational protein folding | protein polymerization |	nucleus | cytoplasm | microtubule | extracellular vesicular exosome |	K7EPE5	0	53
747	lcl|118578	348	0	PHEMX	Pan-hematopoietic expression protein	Pan-hematopoietic expression protein PHEMX				Q7Z5M9	0	348
748	lcl|37523	260	0	RNASET2	Ribonuclease T2	Ribonuclease T2 RNASET2	RNA binding | ribonuclease activity | ribonuclease T2 activity |	RNA catabolic process | RNA phosphodiester bond hydrolysis | RNA phosphodiester bond hydrolysis |	extracellular region | extracellular space | lysosome | endoplasmic reticulum lumen | lysosomal lumen |	D6REQ6 530384149	0	260
749	lcl|146061	70	0	COX2	Cytochrome c oxidase subunit 2	Cytochrome c oxidase subunit 2 COX2				H9M675	0	70
750	lcl|91990	152	0	PLAA	Phospholipase A-2-activating protein (Fragment)	Phospholipase A-2-activating protein (Fragment) PLAA	protein binding | phospholipase A2 activator activity |	phospholipid metabolic process | inflammatory response | signal transduction | positive regulation of catalytic activity |	extracellular vesicular exosome |	H0YC16	0	152
751	lcl|76758	495	0	PPM1F	Protein phosphatase 1F	Protein phosphatase 1F PPM1F	protein serine/threonine phosphatase activity | protein serine/threonine phosphatase activity | protein binding | phosphatase activity | calmodulin-dependent protein phosphatase activity | metal ion binding |	negative regulation of protein kinase activity | positive regulation of gene expression | positive regulation of epithelial cell migration | positive regulation of cell-substrate adhesion | histone dephosphorylation | negative regulation of peptidyl-serine phosphorylation | cellular response to drug | peptidyl-threonine dephosphorylation | positive regulation of cysteine-type endopeptidase activi…	cytosol | protein complex | perinuclear region of cytoplasm |	P49593 7661862	8	487
752	lcl|131411	963	0		Carnitine palmitoyltransferase 1B isoform a variant (Fragment)	Carnitine palmitoyltransferase 1B isoform a variant (Fragment)				Q53FV7	6	957
753	lcl|58976	487	0	SERPINB6	serpin B6 isoform c	serpin B6 isoform c SERPINB6	protease binding | serine-type endopeptidase inhibitor activity | serine-type endopeptidase inhibitor activity |	negative regulation of endopeptidase activity | negative regulation of endopeptidase activity | regulation of proteolysis |	extracellular space | cytoplasm | cytosol | protein complex | extracellular vesicular exosome |	425876766	20	467
754	lcl|143811	770	0	OSBPL11	Oxysterol-binding protein-related protein 11	Oxysterol-binding protein-related protein 11 OSBPL11	lipid binding |	lipid transport | positive regulation of sequestering of triglyceride | fat cell differentiation |	Golgi apparatus | late endosome membrane |	Q9BXB4 19923592	32	738
755	lcl|132932	68	0	HLA-A	MHC class I antigen (Fragment)	MHC class I antigen (Fragment) HLA-A	receptor binding | receptor binding | protein binding | peptide antigen binding | peptide antigen binding | peptide antigen binding | poly(A) RNA binding | TAP binding |	positive regulation of T cell mediated cytotoxicity | positive regulation of T cell mediated cytotoxicity | antigen processing and presentation of peptide antigen via MHC class I | antigen processing and presentation of exogenous peptide antigen via MHC class I, TAP-dependent | antigen processing and presentation of exogenous peptide antigen via MHC class I, TAP-independent | antigen processing a…	Golgi membrane | plasma membrane | integral component of plasma membrane | cell surface | ER to Golgi transport vesicle membrane | phagocytic vesicle membrane | early endosome membrane | MHC class I protein complex | MHC class I protein complex | extracellular vesicular exosome | integral component of lumenal side of endoplasmic reticulum membrane |	D5FHG1 D5FHP7	0	68
756	lcl|136025	239	0	UCMA	Unique cartilage matrix-associated protein	Unique cartilage matrix-associated protein UCMA		negative regulation of osteoblast differentiation |	proteinaceous extracellular matrix | extracellular space | aggresome | perinuclear region of cytoplasm |	Q8WVF2 50400088	4	235
757	lcl|15513	145	0	FUT9	Alternative protein FUT9	Alternative protein FUT9 FUT9	fucosyltransferase activity | alpha-(1->3)-fucosyltransferase activity |	carbohydrate metabolic process | protein glycosylation | protein glycosylation | nervous system development | fucosylation | L-fucose catabolic process |	Golgi apparatus | integral component of membrane | Golgi cisterna membrane |	B4DEW1	0	145
758	lcl|96497	10	0	ATP6	ATP synthase subunit a	ATP synthase subunit a ATP6				Q4EXG9	8	2
759	lcl|68627	905	0	PPM1A	protein phosphatase 1A isoform 3	protein phosphatase 1A isoform 3 PPM1A	magnesium ion binding | protein serine/threonine phosphatase activity | protein serine/threonine phosphatase activity | signal transducer activity | protein binding | protein C-terminus binding | manganese ion binding | calmodulin-dependent protein phosphatase activity | R-SMAD binding |	negative regulation of transcription from RNA polymerase II promoter | transcription, DNA-templated | transcription initiation from RNA polymerase II promoter | protein dephosphorylation | N-terminal protein myristoylation | cell cycle arrest | transforming growth factor beta receptor signaling pathway | insulin receptor signaling pathway | gene expression | negative regulation of SMAD protein co…	nucleus | nucleoplasm | cytosol | cytosol | voltage-gated calcium channel complex | membrane | neuron projection |	193211600	10	895
760	lcl|85078	616	0	ARHGAP8	Rho GTPase-activating protein 8	Rho GTPase-activating protein 8 ARHGAP8	Rho GTPase activator activity | protein binding |	small GTPase mediated signal transduction | positive regulation of Rho GTPase activity | regulation of small GTPase mediated signal transduction | positive regulation of ERK1 and ERK2 cascade |	cytosol |	P85298 66346662	4	612
761	lcl|2485	241	0	TM7SF2	Delta(14)-sterol reductase	Delta(14)-sterol reductase TM7SF2	delta14-sterol reductase activity |	cholesterol biosynthetic process | small molecule metabolic process |	endoplasmic reticulum | endoplasmic reticulum membrane | integral component of plasma membrane | receptor complex |	F5GYV3	8	233
762	lcl|22167	2	0	CD84	Leucocyte differentiation antigen CD84 (Fragment)	Leucocyte differentiation antigen CD84 (Fragment) CD84	receptor activity | protein binding |	defense response | homophilic cell adhesion | blood coagulation | leukocyte migration |	plasma membrane | integral component of plasma membrane |	Q96RX1	0	2
763	lcl|79266	701	0	LIMD1	LIM domain-containing protein 1	LIM domain-containing protein 1 LIMD1	transcription corepressor activity | protein binding | zinc ion binding |	response to hypoxia | osteoblast development | transcription, DNA-templated | regulation of transcription, DNA-templated | cytoskeleton organization | signal transduction | multicellular organismal development | regulation of cell shape | phosphorylation | cell migration | cytoplasmic mRNA processing body assembly | gene silencing by miRNA | negative regulation of hippo signaling | negative regul…	cytoplasmic mRNA processing body | nucleus | cytoplasm | adherens junction | focal adhesion | RISC complex |	C9JRJ5	8	693
764	lcl|36338	208	0	SEPT9	Septin-9 (Fragment)	Septin-9 (Fragment) SEPT9	GTPase activity | protein binding | GTP binding |	GTP catabolic process | cell cycle | protein heterooligomerization | cell division |	stress fiber | cytoplasm | microtubule | perinuclear region of cytoplasm |	K7EIR4	0	208
765	lcl|70561	603	0		General transcription factor IIH, polypeptide 4, 52kDa variant (Fragment)	General transcription factor IIH, polypeptide 4, 52kDa variant (Fragment)				Q53HH3	12	591
766	lcl|149150	491	0	PFKFB2	Fructose-2,6-bisphosphatase	Fructose-2,6-bisphosphatase PFKFB2	6-phosphofructo-2-kinase activity | fructose-2,6-bisphosphate 2-phosphatase activity | protein binding | ATP binding | protein kinase binding |	carbohydrate metabolic process | fructose metabolic process | fructose 2,6-bisphosphate metabolic process | glucose metabolic process | glucose catabolic process | lactate metabolic process | pyruvate metabolic process | glycolytic process | glycolytic process | response to glucose | positive regulation of insulin secretion | positive regulation of glucokinase activity | small molecule metabolic …	cytosol |	B4DI16	4	487
767	lcl|52014	87	0	ND2	NADH-ubiquinone oxidoreductase chain 2	NADH-ubiquinone oxidoreductase chain 2 ND2				U3L359	16	71
768	lcl|113925	2535	0	CSMD3	CUB and sushi domain-containing protein 3	CUB and sushi domain-containing protein 3 CSMD3			plasma membrane | integral component of membrane |	Q7Z407 38045888	24	2511
769	lcl|60851	240	0	LINC00483	Putative uncharacterized protein encoded by LINC00483	Putative uncharacterized protein encoded by LINC00483 LINC00483				Q53H64	0	240
770	lcl|143060	324	0	TCF25	Transcription factor 25 (Fragment)	Transcription factor 25 (Fragment) TCF25	DNA binding | sequence-specific DNA binding transcription factor activity | protein binding |	negative regulation of transcription from RNA polymerase II promoter | transcription, DNA-templated | heart development |	nucleus |	H3BS87	8	316
771	lcl|2607	1562	0	FAM65B	Protein FAM65B	Protein FAM65B FAM65B		muscle organ development | cell differentiation |	mitochondrion | cytoskeleton | filopodium |	F5GX51 556695488	16	1546
772	lcl|9400	336	0	SLC44A3	choline transporter-like protein 3 isoform 6	choline transporter-like protein 3 isoform 6 SLC44A3		phospholipid metabolic process | phosphatidylcholine biosynthetic process | small molecule metabolic process | glycerophospholipid biosynthetic process | transmembrane transport |	plasma membrane | integral component of membrane |	385275092	0	336
773	lcl|16586	116	0	ND5	NADH-ubiquinone oxidoreductase chain 5	NADH-ubiquinone oxidoreductase chain 5 ND5				T1PZR2	12	104
774	lcl|74056	75	0	ZNF641	PREDICTED: zinc finger protein 641 isoform X4	PREDICTED: zinc finger protein 641 isoform X4 ZNF641	sequence-specific DNA binding RNA polymerase II transcription factor activity | DNA binding | metal ion binding |	regulation of transcription from RNA polymerase II promoter | transcription from RNA polymerase II promoter |		530399748	0	75
775	lcl|114788	144	0	HLA-C	MHC class I antigen (Fragment)	MHC class I antigen (Fragment) HLA-C	receptor binding | peptide antigen binding | peptide antigen binding | peptide antigen binding | TAP binding |	positive regulation of T cell mediated cytotoxicity | antigen processing and presentation of peptide antigen via MHC class I | antigen processing and presentation of exogenous peptide antigen via MHC class I, TAP-dependent | antigen processing and presentation of exogenous peptide antigen via MHC class I, TAP-independent | antigen processing and presentation of endogenous peptide antigen via MHC …	Golgi membrane | extracellular region | plasma membrane | integral component of plasma membrane | cell surface | cell surface | ER to Golgi transport vesicle membrane | phagocytic vesicle membrane | early endosome membrane | MHC class I protein complex | MHC class I protein complex | extracellular vesicular exosome | integral component of lumenal side of endoplasmic reticulum membrane |	J7K468	0	144
776	lcl|37056	429	0	GC	Vitamin D-binding protein	Vitamin D-binding protein GC	actin binding | vitamin D binding | vitamin transporter activity | calcidiol binding |	steroid metabolic process | vitamin D metabolic process | small molecule metabolic process | vitamin transport |	extracellular region | extracellular region | cytosol | lysosomal lumen | blood microparticle |	D6RBJ7	0	429
777	lcl|78861	33	0	F8	Coagulation factor VIII (Fragment)	Coagulation factor VIII (Fragment) F8	serine-type endopeptidase activity | copper ion binding | protein binding | oxidoreductase activity |	platelet degranulation | acute-phase response | cell adhesion | blood coagulation | blood coagulation, intrinsic pathway | platelet activation |	extracellular region | extracellular region | extracellular space | plasma membrane | platelet alpha granule lumen |	A0A2G2	0	33
778	lcl|60236	1776	0	FLT4	Vascular endothelial growth factor receptor 3	Vascular endothelial growth factor receptor 3 FLT4	transmembrane receptor protein tyrosine kinase activity | vascular endothelial growth factor-activated receptor activity | vascular endothelial growth factor-activated receptor activity | protein binding | ATP binding | growth factor binding | protein phosphatase binding |	positive regulation of protein phosphorylation | positive regulation of endothelial cell proliferation | vasculature development | lymph vessel development | lymphangiogenesis | lymphangiogenesis | sprouting angiogenesis | transmembrane receptor protein tyrosine kinase signaling pathway | positive regulation of cell proliferation | positive regulation of cell proliferation | positive regulation v…	extracellular region | nucleus | cytoplasm | plasma membrane | plasma membrane | integral component of plasma membrane | receptor complex |	P35916 104294888	18	1758
779	lcl|45586	480	0	KDM3B	Lysine-specific demethylase 3B (Fragment)	Lysine-specific demethylase 3B (Fragment) KDM3B	metal ion binding | dioxygenase activity |	transcription, DNA-templated | regulation of transcription, DNA-templated | chromatin modification |	nucleus |	H0Y9V5	6	474
780	lcl|109433	693	0	JMJD4	jmjC domain-containing protein 4 isoform 2	jmjC domain-containing protein 4 isoform 2 JMJD4	protein binding |			239788849	14	679
781	lcl|149125	69	0	COX2	Cytochrome c oxidase subunit 2	Cytochrome c oxidase subunit 2 COX2				F2WI31	0	69
782	lcl|81007	12	0	MKRN3	Probable E3 ubiquitin-protein ligase makorin-3	Probable E3 ubiquitin-protein ligase makorin-3 MKRN3	protein binding | zinc ion binding | ligase activity |	protein ubiquitination |	ribonucleoprotein complex |	H3BUZ8	0	12
783	lcl|41226	808	0	C6orf223	Uncharacterized protein C6orf223	Uncharacterized protein C6orf223 C6orf223				Q8N319 55769539	22	786
784	lcl|96343	938	0	TMSB10	Thymosin, beta 10, isoform CRA_a (Fragment)	Thymosin, beta 10, isoform CRA_a (Fragment) TMSB10	actin binding |	actin cytoskeleton organization | sequestering of actin monomers |	cytoplasm | cytoskeleton |	D6W5K2	54	884
785	lcl|103598	980	0	LPIN2	Phosphatidate phosphatase LPIN2	Phosphatidate phosphatase LPIN2 LPIN2	transcription coactivator activity | phosphatidate phosphatase activity |	transcription, DNA-templated | lipid metabolic process | fatty acid metabolic process | phospholipid metabolic process | phosphatidylethanolamine biosynthetic process | phosphatidylcholine biosynthetic process | dephosphorylation | triglyceride biosynthetic process | cellular lipid metabolic process | small molecule metabolic process | positive regulation of transcription from RNA polymerase II p…	nucleus | endoplasmic reticulum membrane | cytosol |	Q92539 530425009 578832242 530425011 7662022	0	980
786	lcl|113227	108	0	TSLP	Thymic stromal lymphopoietin	Thymic stromal lymphopoietin TSLP	cytokine activity |		extracellular space |	G3XAM8 190886449	0	108
787	lcl|38889	91	0		Uncharacterized protein	Uncharacterized protein				F8VZL2	0	91
788	lcl|154739	1841	0	LOC102725146	PREDICTED: contactin-associated protein-like 3B-like isoform X6	PREDICTED: contactin-associated protein-like 3B-like isoform X6 LOC102725146				578844570	62	1779
789	lcl|140669	838	0		cDNA FLJ61025, highly similar to Homo sapiens thymidine kinase 2, mitochondrial (TK2), mRNA	cDNA FLJ61025, highly similar to Homo sapiens thymidine kinase 2, mitochondrial (TK2), mRNA				B4E0Z4	10	828
790	lcl|9139	3959	0	SLTM	PREDICTED: SAFB-like transcription modulator isoform X3	PREDICTED: SAFB-like transcription modulator isoform X3 SLTM	nucleotide binding | poly(A) RNA binding |	transcription, DNA-templated | regulation of transcription, DNA-templated | apoptotic process |		578827402	94	3865
791	lcl|77480	1130	0	MTMR1	PREDICTED: myotubularin-related protein 1 isoform X3	PREDICTED: myotubularin-related protein 1 isoform X3 MTMR1	phosphatidylinositol-3-phosphatase activity | protein tyrosine phosphatase activity |	phospholipid metabolic process | phosphatidylinositol biosynthetic process | small molecule metabolic process |	cytoplasm | cytosol | plasma membrane |	530422977	33	1097
792	lcl|81439	643	0	bK1048E9.4	BK1048E9.4 protein	BK1048E9.4 protein bK1048E9.4				Q6ICH6	10	633
793	lcl|47241	954	0		cDNA FLJ56405, highly similar to Epidermal growth factor receptor kinase substrate 8	cDNA FLJ56405, highly similar to Epidermal growth factor receptor kinase substrate 8				B4E3T6	8	946
794	lcl|128516	928	0		cDNA FLJ61617, highly similar to FERM, RhoGEF and pleckstrin domain-containing protein 2	cDNA FLJ61617, highly similar to FERM, RhoGEF and pleckstrin domain-containing protein 2				B7Z6J8	20	908
795	lcl|153679	46	0	MPP6	MAGUK p55 subfamily member 6	MAGUK p55 subfamily member 6 MPP6	protein binding | PDZ domain binding |	protein complex assembly |	plasma membrane | membrane | extracellular vesicular exosome |	F8WCD2	0	46
796	lcl|81457	104	0	CNOT6L	CCR4-NOT transcription complex subunit 6-like	CCR4-NOT transcription complex subunit 6-like CNOT6L	poly(A)-specific ribonuclease activity | protein binding | metal ion binding |	nuclear-transcribed mRNA catabolic process, deadenylation-dependent decay | nuclear-transcribed mRNA poly(A) tail shortening | transcription, DNA-templated | regulation of transcription, DNA-templated | regulation of translation | positive regulation of cell proliferation | gene expression | positive regulation of cytoplasmic mRNA processing body assembly | RNA metabolic process | mRNA metabolic …	nucleus | cytoplasm | cytosol | CCR4-NOT complex |	D6RIW9	2	102
797	lcl|140474	9	0	KRTAP4-7	Keratin-associated protein 4-7	Keratin-associated protein 4-7 KRTAP4-7				Q9BYR0	0	9
798	lcl|149928	1702	0	CNTNAP3B	PREDICTED: contactin-associated protein-like 3B isoform X4	PREDICTED: contactin-associated protein-like 3B isoform X4 CNTNAP3B		cell adhesion |	integral component of membrane |	578816695	54	1648
799	lcl|58425	906	0	ABLIM3	PREDICTED: actin-binding LIM protein 3 isoform X5	PREDICTED: actin-binding LIM protein 3 isoform X5 ABLIM3	actin binding | zinc ion binding |	cytoskeleton organization | axon guidance | positive regulation of transcription from RNA polymerase II promoter |	cytoplasm |	530380446	26	880
800	lcl|62449	2249	0	RASIP1	PREDICTED: ras-interacting protein 1 isoform X3	PREDICTED: ras-interacting protein 1 isoform X3 RASIP1		angiogenesis | vasculogenesis | signal transduction | negative regulation of autophagy | regulation of Rho GTPase activity | branching morphogenesis of an epithelial tube |	Golgi stack | perinuclear region of cytoplasm |	578834569	98	2151
801	lcl|122377	71	0	HLA-A	MHC class I antigen (Fragment)	MHC class I antigen (Fragment) HLA-A	receptor binding | receptor binding | protein binding | peptide antigen binding | peptide antigen binding | peptide antigen binding | poly(A) RNA binding | TAP binding |	positive regulation of T cell mediated cytotoxicity | positive regulation of T cell mediated cytotoxicity | antigen processing and presentation of peptide antigen via MHC class I | antigen processing and presentation of exogenous peptide antigen via MHC class I, TAP-dependent | antigen processing and presentation of exogenous peptide antigen via MHC class I, TAP-independent | antigen processing a…	Golgi membrane | plasma membrane | integral component of plasma membrane | cell surface | ER to Golgi transport vesicle membrane | phagocytic vesicle membrane | early endosome membrane | MHC class I protein complex | MHC class I protein complex | extracellular vesicular exosome | integral component of lumenal side of endoplasmic reticulum membrane |	D0EP74	0	71
802	lcl|18876	126	0	MICAL3	Protein-methionine sulfoxide oxidase MICAL3 (Fragment)	Protein-methionine sulfoxide oxidase MICAL3 (Fragment) MICAL3	actin binding | zinc ion binding | oxidoreductase activity, acting on paired donors, with incorporation or reduction of molecular oxygen, NAD(P)H as one donor, and incorporation of one atom of oxygen | FAD binding |	exocytosis | actin filament depolymerization | oxidation-reduction process |	cytoskeleton |	J3QLA3	0	126
803	lcl|38980	234	0	MGLL	Monoglyceride lipase	Monoglyceride lipase MGLL	lysophospholipase activity | lipid binding | protein homodimerization activity | acylglycerol lipase activity | acylglycerol lipase activity |	lipid metabolic process | fatty acid biosynthetic process | phospholipid metabolic process | inflammatory response | blood coagulation | regulation of signal transduction | arachidonic acid metabolic process | triglyceride catabolic process | triglyceride catabolic process | platelet activation | acylglycerol acyl-chain remodeling | small molecule metabolic process | acylglycerol catabolic proces…	endoplasmic reticulum membrane | plasma membrane | synapse |	Q99685 51242953	0	234
804	lcl|85503	129	0	RNF8	E3 ubiquitin-protein ligase RNF8	E3 ubiquitin-protein ligase RNF8 RNF8	chromatin binding | ubiquitin-protein ligase activity | protein binding | zinc ion binding | ubiquitin protein ligase binding | histone binding | protein homodimerization activity |	double-strand break repair | double-strand break repair via nonhomologous end joining | ubiquitin-dependent protein catabolic process | cellular response to DNA damage stimulus | mitosis | spermatid development | response to ionizing radiation | histone H2A ubiquitination | histone H2B ubiquitination | interstrand cross-link repair | histone exchange | isotype switching | positive regulation of D…	ubiquitin ligase complex | chromosome, telomeric region | nucleus | midbody | site of double-strand break |	F8WEW6	0	129
805	lcl|148390	30	0	ND1	NADH-ubiquinone oxidoreductase chain 1	NADH-ubiquinone oxidoreductase chain 1 ND1				H9MSR8	4	26
806	lcl|136508	687	0	TRIB3	Tribbles homolog 3	Tribbles homolog 3 TRIB3	transcription corepressor activity | protein kinase inhibitor activity | protein binding | ATP binding | kinase activity | protein kinase binding | protein kinase binding | ubiquitin protein ligase binding | ubiquitin-protein ligase regulator activity |	transcription, DNA-templated | protein phosphorylation | negative regulation of protein kinase activity | epidermal growth factor receptor signaling pathway | insulin receptor signaling pathway | fibroblast growth factor receptor signaling pathway | regulation of glucose transport | positive regulation of protein binding | cellular response to insulin stimulus | response to endoplasmic reticulum …	nucleus | cytosol | plasma membrane |	J3KR25	80	607
807	lcl|72484	644	0	SYF2	Pre-mRNA-splicing factor SYF2	Pre-mRNA-splicing factor SYF2 SYF2	poly(A) RNA binding |	mRNA splicing, via spliceosome | in utero embryonic development | gastrulation | embryonic organ development |	nucleus | nucleus | catalytic step 2 spliceosome |	O95926 7661636	16	628
808	lcl|25409	466	0	ABO	ABO glycotransferase (Fragment)	ABO glycotransferase (Fragment) ABO	glycoprotein-fucosylgalactoside alpha-N-acetylgalactosaminyltransferase activity | fucosylgalactoside 3-alpha-galactosyltransferase activity | metal ion binding |	protein glycosylation |	extracellular region | integral component of membrane | Golgi cisterna membrane |	E3TGS0	4	462
809	lcl|40999	497	0	ING3	Inhibitor of growth protein 3	Inhibitor of growth protein 3 ING3	histone acetyltransferase activity | zinc ion binding | methylated histone residue binding |	chromatin organization | transcription, DNA-templated | regulation of transcription, DNA-templated | regulation of growth | positive regulation of apoptotic process | histone H4 acetylation | histone H2A acetylation |	Swr1 complex | nucleoplasm | Piccolo NuA4 histone acetyltransferase complex | NuA4 histone acetyltransferase complex |	E7ET07	4	493
810	lcl|97302	124	0	UGT1A3	UDP-glucuronosyltransferase 1A3 (Fragment)	UDP-glucuronosyltransferase 1A3 (Fragment) UGT1A3	retinoic acid binding | UDP-glycosyltransferase activity | glucuronosyltransferase activity | enzyme binding | protein homodimerization activity | protein heterodimerization activity |	metabolic process | retinoic acid metabolic process | flavonoid glucuronidation | xenobiotic glucuronidation |	endoplasmic reticulum membrane | integral component of membrane |	A7E1U4	0	124
811	lcl|94231	313	0		cDNA FLJ51430, highly similar to Phosphatidylinositol-4,5-bisphosphate 3-kinase catalytic subunit delta isoform (EC 2.7.1.153)	cDNA FLJ51430, highly similar to Phosphatidylinositol-4,5-bisphosphate 3-kinase catalytic subunit delta isoform (EC 2.7.1.153)				B4E0L4	4	309
812	lcl|50964	241	0	DAP3	28S ribosomal protein S29, mitochondrial	28S ribosomal protein S29, mitochondrial DAP3	protein binding | poly(A) RNA binding |	apoptotic mitochondrial changes | apoptotic signaling pathway |	mitochondrion | mitochondrial ribosome | small ribosomal subunit |	V9GYL4	0	241
813	lcl|127835	196	0	OR2T33	Olfactory receptor 2T33	Olfactory receptor 2T33 OR2T33	G-protein coupled receptor activity | olfactory receptor activity |		plasma membrane | integral component of membrane |	Q8NG76 52317219	0	196
814	lcl|21660	330	0	ATP5A1	ATP synthase subunit alpha, mitochondrial	ATP synthase subunit alpha, mitochondrial ATP5A1	protein binding | ATP binding | ATPase activity | transmembrane transporter activity | MHC class I protein binding | poly(A) RNA binding | proton-transporting ATP synthase activity, rotational mechanism | proton-transporting ATPase activity, rotational mechanism |	negative regulation of endothelial cell proliferation | ATP catabolic process | lipid metabolic process | ATP biosynthetic process | ATP biosynthetic process | embryo development | ATP hydrolysis coupled proton transport | respiratory electron transport chain | mitochondrial ATP synthesis coupled proton transport | mitochondrial ATP synthesis coupled proton transport | cellular metabolic process …	mitochondrion | mitochondrion | mitochondrial inner membrane | mitochondrial proton-transporting ATP synthase complex | mitochondrial matrix | plasma membrane | COP9 signalosome | proton-transporting ATP synthase complex, catalytic core F(1) | extracellular vesicular exosome |	K7EM08	6	324
815	lcl|22340	238	0	RAPGEF3	Rap guanine nucleotide exchange factor 3 (Fragment)	Rap guanine nucleotide exchange factor 3 (Fragment) RAPGEF3	guanyl-nucleotide exchange factor activity | protein binding | cAMP-dependent protein kinase regulator activity | Rap guanyl-nucleotide exchange factor activity | cAMP binding |	angiogenesis | energy reserve metabolic process | signal transduction | blood coagulation | cell proliferation | cAMP-mediated signaling | platelet activation | positive regulation of cAMP catabolic process | Rap protein signal transduction | positive regulation of Rap GTPase activity | small molecule metabolic process | positive regulation of angiogenesis | regulation of insulin secretion | posi…	plasma membrane | cAMP-dependent protein kinase complex | endomembrane system | membrane | extracellular vesicular exosome |	H0YIP6	0	238
816	lcl|34200	108	0		cDNA FLJ59161, highly similar to Negative elongation factor C/D	cDNA FLJ59161, highly similar to Negative elongation factor C/D				B4E2K1	2	106
817	lcl|74670	1182	0	EPHA4	Ephrin type-A receptor 4	Ephrin type-A receptor 4 EPHA4	protein kinase activity | GPI-linked ephrin receptor activity | transmembrane-ephrin receptor activity | protein binding | ATP binding | PH domain binding | identical protein binding | ephrin receptor binding | DH domain binding |	cell adhesion | adult walking behavior | motor neuron axon guidance | glial cell migration | peptidyl-tyrosine phosphorylation | corticospinal tract morphogenesis | regulation of Rac GTPase activity | regulation of Rap GTPase activity | positive regulation of JUN kinase activity | protein autophosphorylation | negative regulation of axon regeneration | regulation of astrocyte differentiation | re…	cytoplasm | mitochondrial outer membrane | endoplasmic reticulum | Golgi apparatus | integral component of plasma membrane | cell surface | postsynaptic density | cell junction | filopodium | axon | dendrite | neuromuscular junction | early endosome membrane | dendritic spine | perikaryon | axon terminus | axonal growth cone | postsynaptic membrane |	E9PG71 530369978	14	1168
818	lcl|57983	252	0	RHD	Rhesus blood group, D antigen	Rhesus blood group, D antigen RHD	ammonium transmembrane transporter activity |		integral component of plasma membrane |	B4F4S0	8	244
819	lcl|96362	253	0	KLRC2	NKG2-C type II integral membrane protein (Fragment)	NKG2-C type II integral membrane protein (Fragment) KLRC2	transmembrane signaling receptor activity | protein binding | carbohydrate binding |	cellular defense response | signal transduction | innate immune response |	plasma membrane | integral component of plasma membrane |	H0YFK4	0	253
820	lcl|109670	15	0	ND6	NADH-ubiquinone oxidoreductase chain 6	NADH-ubiquinone oxidoreductase chain 6 ND6				A6Z1T4	0	15
831	lcl|85325	65	0	HLA-B	MHC class I antigen (Fragment)	MHC class I antigen (Fragment) HLA-B	receptor binding | receptor binding | peptide antigen binding | peptide antigen binding | peptide antigen binding | TAP binding | TAP binding |	positive regulation of T cell mediated cytotoxicity | positive regulation of T cell mediated cytotoxicity | antigen processing and presentation of peptide antigen via MHC class I | antigen processing and presentation of peptide antigen via MHC class I | antigen processing and presentation of exogenous peptide antigen via MHC class I, TAP-dependent | antigen processing and presentation of exogenou…	Golgi membrane | plasma membrane | integral component of plasma membrane | cell surface | cell surface | ER to Golgi transport vesicle membrane | membrane | integral component of membrane | phagocytic vesicle membrane | early endosome membrane | MHC class I protein complex | MHC class I protein complex | extracellular vesicular exosome | integral component of lumenal side of endoplasmic reticulum…	A1DZT9	0	65
832	lcl|59270	2267	0	PLCL2	Inactive phospholipase C-like protein 2	Inactive phospholipase C-like protein 2 PLCL2	phosphatidylinositol phospholipase C activity | signal transducer activity | calcium ion binding | GABA receptor binding |	lipid metabolic process | intracellular signal transduction |	cytoplasm |	Q9UPR0 221219000	59	2208
833	lcl|34420	522	0		cDNA, FLJ78993, highly similar to Cleft lip and palate transmembrane protein 1	cDNA, FLJ78993, highly similar to Cleft lip and palate transmembrane protein 1				B7Z9X9	2	520
834	lcl|59403	733	0	TIAL1	Nucleolysin TIAR	Nucleolysin TIAR TIAL1	nucleotide binding | RNA binding | AU-rich element binding | poly(A) RNA binding |	regulation of transcription from RNA polymerase II promoter | apoptotic process | defense response | germ cell development | positive regulation of cell proliferation | stem cell division |	nucleus | cytoplasm | lysosome | cytoplasmic stress granule |	Q01085 4507499	22	711
835	lcl|133507	525	0	LETMD1	PREDICTED: LETM1 domain-containing protein 1 isoform X3	PREDICTED: LETM1 domain-containing protein 1 isoform X3 LETMD1	protein binding |		mitochondrial outer membrane | integral component of membrane |	578823561	22	503
836	lcl|66226	1246	0	CIZ1	PREDICTED: cip1-interacting zinc finger protein isoform X6	PREDICTED: cip1-interacting zinc finger protein isoform X6 CIZ1	nucleic acid binding | protein binding | zinc ion binding | cyclin binding |	positive regulation of DNA-dependent DNA replication initiation | maintenance of protein location in nucleus |	nucleus |	530390915	72	1174
837	lcl|81305	771	0	TNNT3	PREDICTED: troponin T, fast skeletal muscle isoform X9	PREDICTED: troponin T, fast skeletal muscle isoform X9 TNNT3	actin binding | tropomyosin binding | tropomyosin binding | troponin C binding | calcium-dependent ATPase activity | troponin I binding | calcium-dependent protein binding |	skeletal muscle contraction | ATP catabolic process | regulation of striated muscle contraction | muscle filament sliding | regulation of ATPase activity |	cytosol | troponin complex |	578820734	2	769
838	lcl|78044	343	0	BNC2	Basonuclin 2 (Fragment)	Basonuclin 2 (Fragment) BNC2	DNA binding | metal ion binding |	endochondral bone growth | transcription, DNA-templated | regulation of transcription, DNA-templated | tongue development | palate development | mesenchyme development |		Q06HB5	0	343
839	lcl|31909	202	0	ABHD14A	Alpha/beta hydrolase domain-containing protein 14A	Alpha/beta hydrolase domain-containing protein 14A ABHD14A	hydrolase activity |		cytoplasm | integral component of membrane |	Q9BUJ0 226437571	4	198
840	lcl|155276	58	0		Myosin (Fragment)	Myosin (Fragment)				Q14782	0	58
841	lcl|5482	924	0		cDNA FLJ57240, highly similar to Mitochondrial proteins import receptor	cDNA FLJ57240, highly similar to Mitochondrial proteins import receptor				B4DZ87	8	916
842	lcl|34349	1761	0	WDFY4	PREDICTED: WD repeat- and FYVE domain-containing protein 4 isoform X4	PREDICTED: WD repeat- and FYVE domain-containing protein 4 isoform X4 WDFY4			integral component of membrane |	530394055	28	1733
843	lcl|47765	426	0	REST	RE1-silencing transcription factor variant E1a/E2/E3/N3a/E4i	RE1-silencing transcription factor variant E1a/E2/E3/N3a/E4i REST	core promoter sequence-specific DNA binding | core promoter binding | RNA polymerase II core promoter proximal region sequence-specific DNA binding transcription factor activity involved in negative regulation of transcription | chromatin binding | sequence-specific DNA binding transcription factor activity | protein binding | transcription factor binding | outward rectifier potassium channel act…	negative regulation of transcription from RNA polymerase II promoter | negative regulation of transcription from RNA polymerase II promoter | regulation of transcription, DNA-templated | negative regulation of cell proliferation | negative regulation of gene expression | negative regulation of aldosterone biosynthetic process | cellular response to drug | positive regulation of apoptotic process …	nucleus | nucleus | cytosol | transcriptional repressor complex |	L0B3Z2	8	418
844	lcl|8731	211	0	LCN8	Epididymal-specific lipocalin-8	Epididymal-specific lipocalin-8 LCN8		transport | response to hormone |	extracellular region |	Q6JVE9	0	211
845	lcl|75234	501	0	SYT8	Synaptotagmin-8	Synaptotagmin-8 SYT8	transporter activity | calcium-dependent protein binding |	acrosome reaction |	acrosomal vesicle | plasma membrane | synaptic vesicle | integral component of membrane |	Q8NBV8	0	501
846	lcl|70938	71	0		HSPC217	HSPC217				Q9P0Q9	0	71
847	lcl|95726	213	0	MAD2L1	Mitotic spindle assembly checkpoint protein MAD2A	Mitotic spindle assembly checkpoint protein MAD2A MAD2L1	protein binding | identical protein binding | protein homodimerization activity |	mitotic sister chromatid segregation | mitotic cell cycle | mitotic cell cycle checkpoint | mitotic spindle assembly checkpoint | anaphase-promoting complex-dependent proteasomal ubiquitin-dependent protein catabolic process | negative regulation of protein catabolic process | negative regulation of apoptotic process | negative regulation of ubiquitin-protein ligase activity involved in mitotic c…	kinetochore | kinetochore | condensed chromosome kinetochore | spindle pole | nucleus | nuclear pore | cytosol | cytosol | perinuclear region of cytoplasm | mitotic spindle |	Q13257 4505067	0	213
848	lcl|132750	456	0	IL3RA	PREDICTED: interleukin-3 receptor subunit alpha isoform X2	PREDICTED: interleukin-3 receptor subunit alpha isoform X2 IL3RA	interleukin-3 receptor activity |	cellular response to interleukin-3 | interleukin-3-mediated signaling pathway |	plasma membrane | integral component of membrane |	530420931 530423009	0	456
849	lcl|21086	468	0	SCRN3	SCRN3 protein	SCRN3 protein SCRN3	dipeptidase activity |			Q0VDG5	2	466
850	lcl|152722	160	0	HLA-DQB1	MHC class II antigen (Fragment)	MHC class II antigen (Fragment) HLA-DQB1	MHC class II receptor activity |	immunoglobulin production involved in immunoglobulin mediated immune response | humoral immune response mediated by circulating immunoglobulin | immune response | cytokine-mediated signaling pathway | antigen processing and presentation of exogenous peptide antigen via MHC class II | T cell costimulation | T cell receptor signaling pathway | interferon-gamma-mediated signaling pathway |	Golgi membrane | lysosomal membrane | plasma membrane | endosome membrane | ER to Golgi transport vesicle membrane | membrane | transport vesicle membrane | endocytic vesicle membrane | clathrin-coated endocytic vesicle membrane | trans-Golgi network membrane | MHC class II protein complex | integral component of lumenal side of endoplasmic reticulum membrane |	F8LFU7 J9Z5V2	0	160
851	lcl|31510	67	0	F2	Prothrombin (Fragment)	Prothrombin (Fragment) F2	serine-type endopeptidase activity | receptor binding | receptor binding | calcium ion binding | protein binding | growth factor activity | thrombospondin receptor activity |	positive regulation of protein phosphorylation | proteolysis | acute-phase response | cell surface receptor signaling pathway | multicellular organismal development | blood coagulation | blood coagulation, intrinsic pathway | positive regulation of cell proliferation | regulation of cell shape | response to wounding | negative regulation of platelet activation | positive regulation of phosphatidy…	extracellular region | extracellular space | endoplasmic reticulum lumen | Golgi lumen | plasma membrane | blood microparticle |	Q8TD58	0	67
852	lcl|152690	166	0	SLC4A3	Anion exchange protein 3 (Fragment)	Anion exchange protein 3 (Fragment) SLC4A3	inorganic anion exchanger activity |	transport | ion transport | bicarbonate transport | regulation of intracellular pH | transmembrane transport |	plasma membrane | integral component of plasma membrane | membrane |	H7C1Z2	0	166
853	lcl|46537	1076	0	CCDC180	Coiled-coil domain-containing protein 180	Coiled-coil domain-containing protein 180 CCDC180			integral component of membrane | extracellular vesicular exosome |	C9JGX5	14	1062
854	lcl|156057	770	0		Delta isoform of regulatory subunit B56, protein phosphatase 2A isoform 1 variant (Fragment)	Delta isoform of regulatory subunit B56, protein phosphatase 2A isoform 1 variant (Fragment)				Q59EF0	4	766
855	lcl|70518	655	0		cDNA FLJ58776, highly similar to Nidogen-2	cDNA FLJ58776, highly similar to Nidogen-2				B4DPX8	8	647
856	lcl|45406	1521	0	DMXL1	Dmx-like 1, isoform CRA_a	Dmx-like 1, isoform CRA_a DMXL1				D3DT08	32	1489
857	lcl|145505	355	0	STK33	Serine/threonine-protein kinase 33 (Fragment)	Serine/threonine-protein kinase 33 (Fragment) STK33	protein serine/threonine kinase activity | ATP binding |	protein autophosphorylation |	perinuclear region of cytoplasm |	C9J6X7	4	351
858	lcl|147577	1389	0	ARHGEF16	Rho guanine nucleotide exchange factor 16	Rho guanine nucleotide exchange factor 16 ARHGEF16	Rho guanyl-nucleotide exchange factor activity | protein binding | Rho GTPase binding | PDZ domain binding | receptor tyrosine kinase binding |	small GTPase mediated signal transduction | activation of Rac GTPase activity | activation of Cdc42 GTPase activity | positive regulation of apoptotic process | neurotrophin TRK receptor signaling pathway | regulation of small GTPase mediated signal transduction | cell chemotaxis | positive regulation of establishment of protein localization to plasma membrane | apoptotic signaling pathway |	cytosol |	Q5VV41 578798946 163792208	28	1361
859	lcl|109122	83	0	BNIP3L	BCL2/adenovirus E1B 19 kDa protein-interacting protein 3-like	BCL2/adenovirus E1B 19 kDa protein-interacting protein 3-like BNIP3L	protein binding | lamin binding | lamin binding | identical protein binding | protein homodimerization activity | protein heterodimerization activity |	viral process | mitochondrial protein catabolic process | positive regulation of apoptotic process | negative regulation of apoptotic process | defense response to virus | mitochondrial outer membrane permeabilization |	nuclear envelope | mitochondrion | mitochondrial outer membrane | endoplasmic reticulum | integral component of membrane | intrinsic component of membrane |	E5RFE9	0	83
860	lcl|112905	226	0	GTSCR1	Gilles de la Tourette syndrome chromosomal region candidate gene 1 protein	Gilles de la Tourette syndrome chromosomal region candidate gene 1 protein GTSCR1			integral component of membrane |	J3KSW9 512125226	4	222
861	lcl|21393	594	0	LRRTM4	LRRTM4 protein	LRRTM4 protein LRRTM4			cell junction | alpha-amino-3-hydroxy-5-methyl-4-isoxazolepropionic acid selective glutamate receptor complex | postsynaptic membrane |	Q4KMX1 544709756	6	588
[truncated: 471,509+ more rows]
