# Supplementary material for: The plasma peptidome
Source: Clin Proteomics. 2018 Dec 1;15:39. doi: 10.1186/s12014-018-9211-3 (PMC6271647; doi:10.1186/s12014-018-9211-3)
Supplement: Supplementary file 2 — Additional file 2. Supplemental Table II. The interleukins, growth factors, cytokines, chemokines and necrosis factors of human EDTA plasma. [file 12014_2018_9211_MOESM2_ESM.xlsx]

## Sheet: Sheet1
TotalProteinIdentificationCount	GeneSymbol	DescriptionDatabase	TANDEM	PD_MSF
111	C1QTNF5	Complement C1q tumor necrosis factor-related protein 5	50	61
87	C1QTNF6	complement C1q tumor necrosis factor-related protein 6	15	72
139	C1QTNF7	complement C1q tumor necrosis factor-related protein 7 isoform a precursor	8	131
132	C1QTNF8	Complement C1q tumor necrosis factor-related protein 8	8	124
167	C1QTNF9	Complement C1q and tumor necrosis factor-related protein 9A	14	153
194	C1QTNF9B	Complement C1q and tumor necrosis factor-related protein 9B	10	184
150	CCDC28A	Coiled-coil domain containing 28A/interleukin-22 receptor subunit alpha-2 fusion variant 2 (Fragment)	6	144
92	CCL21	C-C motif chemokine 21	10	82
42	CCL23	C-C motif chemokine 23	4	38
10	CCL4	Chemokine C-C motif ligand 4	4	6
20	CCL7	C-C motif chemokine 7	4	16
114	CCR10	C-C chemokine receptor type 10	8	106
77	CCR7	C-C chemokine receptor type 7	4	73
49	CD40	PREDICTED: tumor necrosis factor receptor superfamily member 5 isoform X4	6	43
17	CKLF	chemokine-like factor isoform d	4	13
53	CLCF1	Cardiotrophin-like cytokine factor 1	6	47
190	CLEC11A	Stem cell growth factor; lymphocyte secreted C-type lectin	14	176
186	CRLF1	Cytokine receptor-like factor 1	24	162
137	CRLF1	PREDICTED: cytokine receptor-like factor 1 isoform X1	20	117
156	CSF1R	Macrophage colony-stimulating factor 1 receptor	12	144
83	CSF1R	Macrophage colony-stimulating factor 1 receptor	6	77
128	CSF2RA	granulocyte-macrophage colony-stimulating factor receptor subunit alpha isoform b precursor	6	122
159	CSF2RB	PREDICTED: cytokine receptor common subunit beta isoform X1	15	144
30	CSF3	Colony stimulating factor 3 nirs variant 1	6	24
87	CSF3R	PREDICTED: granulocyte colony-stimulating factor receptor isoform X1	6	81
173	CTGF	Connective tissue growth factor	14	159
49	CX3CR1	CX3C chemokine receptor 1 isoform a	4	45
46	CXCL11	C-X-C motif chemokine 11	4	42
47	CXCL16	C-X-C motif chemokine 16 precursor	10	37
58	CXCL17	VEGF coregulated chemokine 1	4	54
158	CXCL2	C-X-C motif chemokine 2	20	138
83	CXCL3	C-X-C motif chemokine 3	6	77
59	CXCL5	C-X-C motif chemokine 5	4	55
130	CXCR3	C-X-C chemokine receptor type 3 isoform 2	4	126
250	DNER	Delta and Notch-like epidermal growth factor-related receptor	6	244
94	EBI3	PREDICTED: interleukin-27 subunit beta isoform X1	4	90
16	EDA2R	PREDICTED: tumor necrosis factor receptor superfamily member 27 isoform X10	4	12
264	EGF	PREDICTED: pro-epidermal growth factor isoform X9	16	248
240	EGFL6	Epidermal growth factor-like protein 6	50	190
99	EGFL7	PREDICTED: epidermal growth factor-like protein 7 isoform X1	16	83
344	EGFR	Epidermal growth factor receptor variant A	10	334
215	EPS15	Epidermal growth factor receptor substrate 15	20	195
217	EPS15L1	Epidermal growth factor receptor substrate 15-like 1	23	194
257	EPS8	PREDICTED: epidermal growth factor receptor kinase substrate 8 isoform X1	8	249
216	EPS8L1	Epidermal growth factor receptor kinase substrate 8-like protein 1	12	204
196	EPS8L2	Epidermal growth factor receptor kinase substrate 8-like protein 2	10	186
182	EPS8L3	PREDICTED: epidermal growth factor receptor kinase substrate 8-like protein 3 isoform X1	6	176
95	FASLG	Tumor necrosis factor ligand superfamily member 6	4	91
66	FGF10	Fibroblast growth factor 10	4	62
66	FGF10	Fibroblast growth factor (Fragment)	4	62
67	FGF10	Fibroblast growth factor (Fragment)	4	63
68	FGF11	Fibroblast growth factor 11	8	60
59	FGF12	Fibroblast growth factor	6	53
105	FGF12	Fibroblast growth factor 12	6	99
95	FGF13	Fibroblast growth factor 13	18	77
117	FGF14	Fibroblast growth factor 14	14	103
90	FGF17	PREDICTED: fibroblast growth factor 17 isoform X2	4	86
251	FGF2	Fibroblast growth factor 2	10	241
25	FGF20	Fibroblast growth factor 20 (Fragment)	4	21
98	FGF22	Fibroblast growth factor	4	94
39	FGF23	Fibroblast growth factor 23	4	35
86	FGF4	Fibroblast growth factor 4	6	80
89	FGF5	Fibroblast growth factor 5	10	79
65	FGF6	Fibroblast growth factor 6	4	61
99	FGF8	Fibroblast growth factor 8	4	95
50	FGFBP2	Fibroblast growth factor-binding protein 2	4	46
194	FGFBP3	Fibroblast growth factor-binding protein 3	6	188
182	FGFR1	PREDICTED: fibroblast growth factor receptor 1 isoform X6	10	172
215	FGFR2	Fibroblast growth factor receptor	7	208
413	FGFR3	Fibroblast growth factor receptor	12	401
203	FGFR4	PREDICTED: fibroblast growth factor receptor 4 isoform X1	28	175
198	FGFRL1	Fibroblast growth factor receptor-like 1	8	190
89	FIBP	PREDICTED: acidic fibroblast growth factor intracellular-binding protein isoform X2	4	85
361	FLT1	Vascular endothelial growth factor receptor 1	10	351
323	FLT4	Vascular endothelial growth factor receptor 3	10	313
119	FRS2	Fibroblast growth factor receptor substrate 2	4	115
119	FRS3	Fibroblast growth factor receptor substrate 3	10	109
142	GFI1	"Growth factor independent 1, isoform CRA_a"	10	132
122	GRB10	PREDICTED: growth factor receptor-bound protein 10 isoform X10	8	114
181	GRB14	Growth factor receptor-bound protein 14	12	169
65	GRB2	Growth factor receptor-bound protein 2	4	61
164	GRB7	growth factor receptor-bound protein 7 isoform b	4	160
85	HBEGF	Proheparin-binding EGF-like growth factor	4	81
258	HDGF	hepatoma-derived growth factor isoform b	4	254
65	HDGFL1	Hepatoma-derived growth factor-like protein 1	6	59
118	HDGFRP2	Hepatoma-derived growth factor-related protein 2 (Fragment)	44	74
313	HDGFRP2	Hepatoma-derived growth factor-related protein 2	14	299
227	HGF	Hepatocyte growth factor	6	221
131	HGFAC	Hepatocyte growth factor activator	4	127
158	HGS	Hepatocyte growth factor-regulated tyrosine kinase substrate	4	154
89	HGS	Hepatocyte growth factor-regulated tyrosine kinase substrate (Fragment)	4	85
49	HSIL5R2	Interleukin-5 receptor type 2 (Precursor)	0	49
14	HSIL5R3	Interleukin-5 receptor type 3 (Fragment)	0	14
353	IGF1R	PREDICTED: insulin-like growth factor 1 receptor isoform X3	20	333
79	IGF2	insulin-like growth factor II isoform 2	6	73
586	IGF2-AS	Putative insulin-like growth factor 2 antisense gene protein	36	550
746	IGF2BP1	Insulin-like growth factor 2 mRNA-binding protein 1	45	701
225	IGF2BP2	insulin-like growth factor 2 mRNA-binding protein 2 isoform b	17	208
186	IGF2BP3	PREDICTED: insulin-like growth factor 2 mRNA-binding protein 3 isoform X1	6	180
13	IGF2R	Insulin-like growth factor type 2 receptor (Fragment)	6	7
178	IGFALS	Insulin-like growth factor-binding protein complex acid labile subunit	17	161
51	IGFBP1	Insulin-like growth factor binding protein 1	8	43
69	IGFBP2	Insulin-like growth factor-binding protein 2 (Fragment)	26	43
118	IGFBP3	insulin-like growth factor-binding protein 3 isoform a precursor	8	110
91	IGFBP4	Insulin-like growth factor-binding protein 4	26	65
86	IGFBP6	Insulin-like growth factor-binding protein 6	4	82
122	IGFBP7	Insulin-like growth factor-binding protein 7	11	111
35	IL10	Interleukin-10	0	35
53	IL10RA	Interleukin 10 alpha receptor	2	51
59	IL10RA	Interleukin-10 receptor subunit alpha	2	57
32	IL10RB	Interleukin-10 receptor subunit beta	0	32
58	IL11	Interleukin-11	8	50
53	IL11RA	Interleukin-11 receptor subunit alpha (Fragment)	10	43
66	IL12A	Interleukin-12 subunit alpha	4	62
62	IL12B	Interleukin-12 subunit beta	0	62
148	IL12RB1	interleukin-12 receptor subunit beta-1 isoform 4	2	146
188	IL12RB2	Interleukin-12 receptor subunit beta-2	10	178
41	IL13	Interleukin 13	2	39
82	IL13RA1	Interleukin-13 receptor subunit alpha-1	24	58
70	IL13RA2	Interleukin-13 receptor subunit alpha-2	2	68
8	IL15	Interleukin	2	6
117	IL15RA	interleukin-15 receptor subunit alpha isoform 4	10	107
125	IL16	Pro-interleukin-16	6	119
519	IL16	PREDICTED: pro-interleukin-16 isoform X1	42	477
491	IL16	Pro-interleukin-16	42	449
52	IL17A	Interleukin-17A	2	50
54	IL17B	Interleukin-17B	0	54
52	IL17C	Interleukin-17C	2	50
157	IL17D	Interleukin-17D	16	141
49	IL17F	Interleukin-17F	2	47
174	IL17RA	Interleukin-17 receptor A	4	170
70	IL17RB	PREDICTED: interleukin-17 receptor B isoform X6	2	68
223	IL17RC	PREDICTED: interleukin-17 receptor C isoform X2	32	191
210	IL17RD	PREDICTED: interleukin-17 receptor D isoform X2	4	206
149	IL17RE	PREDICTED: interleukin-17 receptor E isoform X3	10	139
84	IL17REL	Putative interleukin-17 receptor E-like	4	80
75	IL18	Interleukin-18	4	71
26	IL18BP	interleukin-18-binding protein isoform d precursor	0	26
143	IL18R1	PREDICTED: interleukin-18 receptor 1 isoform X2	6	137
154	IL18R1	interleukin-18 receptor 1 isoform 2	4	150
176	IL18RAP	Interleukin-18 receptor accessory protein	6	170
53	IL19	interleukin-19 isoform 1	4	49
48	IL1A	Interleukin-1 alpha	0	48
71	IL1B	Interleukin-1 beta	0	71
29	IL1F10	Interleukin-1 family member 10	0	29
159	IL1R1	"Interleukin 1 receptor, type I"	8	151
72	IL1R2	Interleukin-1 receptor type 2	2	70
3	IL-1ra3	Type II interleukin-1 receptor antagonist (Fragment)	2	1
186	IL1RAP	PREDICTED: interleukin-1 receptor accessory protein isoform X1	2	184
148	IL1RAPL1	Interleukin-1 receptor accessory protein-like 1	2	146
148	IL1RAPL2	X-linked interleukin-1 receptor accessory protein-like 2	10	138
170	IL1RL1	Interleukin-1 receptor-like 1	2	168
148	IL1RL2	PREDICTED: interleukin-1 receptor-like 2 isoform X4	0	148
31	IL1RN	interleukin-1 receptor antagonist protein isoform 2	2	29
43	IL2	Interleukin 2	2	41
70	IL20	PREDICTED: interleukin-20 isoform X1	2	68
91	IL20RA	PREDICTED: interleukin-20 receptor subunit alpha isoform X1	2	89
44	IL20RB	Interleukin-20 receptor subunit beta	6	38
89	IL21	interleukin-21 isoform 1 precursor	4	85
59	IL21R	interleukin-21 receptor isoform 2 precursor	2	57
46	IL22	Interleukin 22	2	44
70	IL22RA1	Interleukin-22 receptor subunit alpha-1	2	68
30	IL22RA2	interleukin-22 receptor subunit alpha-2 isoform 2 precursor	2	28
31	IL23R	Interleukin 23 receptor (Fragment)	6	25
47	IL24	PREDICTED: interleukin-24 isoform X1	2	45
51	IL25	interleukin-25 isoform 2 precursor	2	49
57	IL27	Interleukin-27 subunit alpha	0	57
76	IL27RA	Interleukin-27 receptor subunit alpha	0	76
46	IL28RA	Interleukin 28 alpha receptor	0	46
30	IL2RA	Interleukin-2 receptor subunit alpha (Fragment)	4	26
51	IL2RB	Interleukin-2 receptor subunit beta (Fragment)	8	43
45	IL3	Interleukin-3	0	45
60	IL31	Interleukin-31	0	60
174	IL31RA	interleukin-31 receptor subunit alpha isoform 2 precursor	2	172
68	IL32	interleukin-32 isoform D	10	58
102	IL33	Interleukin-33	0	102
30	IL34	Interleukin-34	2	28
38	IL36A	Interleukin-36 alpha	2	36
44	IL36B	Interleukin-36 beta	0	44
65	IL36G	interleukin-36 gamma isoform 2	18	47
25	IL36RN	Interleukin-36 receptor antagonist protein (Fragment)	0	25
108	IL37	interleukin-37 isoform 2	4	104
82	IL3RA	PREDICTED: interleukin-3 receptor subunit alpha isoform X2	0	82
107	IL4	Interleukin 4 delta 2 (Fragment)	2	105
181	IL4I1	Interleukin 4 induced 1	4	177
190	IL4R	PREDICTED: interleukin-4 receptor subunit alpha isoform X1	8	182
50	IL5	PREDICTED: interleukin-5 isoform X2	12	38
54	IL5RA	interleukin-5 receptor subunit alpha isoform 4 precursor	0	54
64	IL6	Interleukin-6	10	54
78	IL6R	Interleukin-6 receptor subunit alpha (Fragment)	2	76
131	IL6ST	"Interleukin 6 signal transducer (Gp130, oncostatin M receptor)"	12	119
138	IL7	interleukin-7 isoform 2 precursor	2	136
53	IL7R	Interleukin-7 receptor subunit alpha	0	53
43	IL8	Interleukin-8	2	41
10	IL9	Interleukin 9	0	10
36	IL9R	interleukin-9 receptor isoform 2	0	36
73	ILF2	Interleukin enhancer-binding factor 2	4	69
330	ILF3	interleukin enhancer-binding factor 3 isoform c	20	310
93	IRAK1	Interleukin-1 receptor-associated kinase 1 (Fragment)	17	76
47	IRAK1BP1	PREDICTED: interleukin-1 receptor-associated kinase 1-binding protein 1 isoform X3	4	43
174	IRAK2	Interleukin-1 receptor-associated kinase-like 2	6	168
119	IRAK3	Interleukin-1 receptor-associated kinase 3	6	113
72	IRAK4	PREDICTED: interleukin-1 receptor-associated kinase 4 isoform X10	4	68
356	KDR	Vascular endothelial growth factor receptor 2	18	338
400	KIT	mast/stem cell growth factor receptor Kit isoform 2 precursor	10	390
33	LITAF	Lipopolysaccharide-induced tumor necrosis factor-alpha factor (Fragment)	20	13
21	LOC102725469	PREDICTED: interleukin-9 receptor-like	2	19
443	LTBP1	PREDICTED: latent-transforming growth factor beta-binding protein 1 isoform X4	20	423
554	LTBP2	Latent-transforming growth factor beta-binding protein 2	25	529
590	LTBP3	Latent-transforming growth factor beta-binding protein 3	71	519
525	LTBP4	Latent-transforming growth factor beta-binding protein 4	458	67
42	LTBR	PREDICTED: tumor necrosis factor receptor superfamily member 3 isoform X2	6	36
141	MEGF11	PREDICTED: multiple epidermal growth factor-like domains protein 11 isoform X1	10	131
342	MEGF6	Multiple epidermal growth factor-like domains protein 6	6	336
645	MEGF8	Multiple epidermal growth factor-like domains protein 8	102	543
331	MET	Hepatocyte growth factor receptor	10	321
199	MST1	PREDICTED: hepatocyte growth factor-like protein isoform X1	12	187
132	NFIL3	Nuclear factor interleukin 3 regulated protein	6	126
133	NGF	Beta-nerve growth factor	6	127
85	NGFR	Tumor necrosis factor receptor superfamily member 16	6	79
180	NTRK1	high affinity nerve growth factor receptor isoform 3	18	162
295	OGFR	Opioid growth factor receptor	6	289
127	OGFRL1	Opioid growth factor receptor-like protein 1	8	119
115	PDGFB	platelet-derived growth factor subunit B isoform 2 preproprotein	4	111
91	PDGFC	PREDICTED: platelet-derived growth factor C isoform X1	6	85
255	PDGFRA	PREDICTED: platelet-derived growth factor receptor alpha isoform X3	8	247
156	PDGFRB	Platelet-derived growth factor receptor beta	8	148
36	PGF	Placenta growth factor	4	32
223	QSCN6	Bone-derived growth factor (Fragment)	8	215
197	RELT	Tumor necrosis factor receptor superfamily member 19L	28	169
64	SOCS2	Suppressor of cytokine signaling-2	8	56
50	SOCS3	Suppressor of cytokine signaling 3	6	44
100	SOCS4	Suppressor of cytokine signaling 4	8	92
289	SOCS5	Suppressor of cytokine signaling 5	6	283
142	SOCS6	Suppressor of cytokine signaling 6	16	126
201	SOCS7	PREDICTED: suppressor of cytokine signaling 7 isoform X2	65	136
93	TBRG1	Transforming growth factor beta regulator 1	18	75
173	TBRG4	"cDNA FLJ56153, highly similar to Homo sapiens transforming growth factor beta regulator 4 (TBRG4), transcript variant 1, mRNA"	14	159
59	TDGF1	Teratocarcinoma-derived growth factor 1	4	55
107	TGFB1	transforming growth factor beta-1 precursor	8	99
151	TGFB1I1	transforming growth factor beta-1-induced transcript 1 protein isoform 2	4	147
96	TGFB3	Transforming growth factor beta-3	6	90
171	TGFBI	Transforming growth factor-beta-induced protein ig-h3	14	157
142	TGFBR3	transforming growth factor beta receptor type 3 isoform b precursor	8	134
73	TGFBR3L	Transforming growth factor-beta receptor type 3-like protein	20	53
251	TGFBRAP1	Transforming growth factor-beta receptor-associated protein 1	10	241
113	TIRAP	PREDICTED: toll/interleukin-1 receptor domain-containing adapter protein isoform X1	12	101
34	TMEM219	Insulin-like growth factor-binding protein 3 receptor	4	30
117	TNFAIP2	Tumor necrosis factor alpha-induced protein 2 (Fragment)	12	105
336	TNFAIP3	Truncated tumor necrosis factor alpha-induced protein 3	18	318
106	TNFAIP8L1	Tumor necrosis factor alpha-induced protein 8-like protein 1	4	102
94	TNFAIP8L3	Tumor necrosis factor alpha-induced protein 8-like protein 3	4	90
148	TNFRSF10A	Tumor necrosis factor receptor superfamily member 10A	12	136
180	TNFRSF10B	tumor necrosis factor receptor superfamily member 10B isoform 2 precursor	40	140
179	TNFRSF10D	Tumor necrosis factor receptor superfamily member 10D	16	163
191	TNFRSF11A	tumor necrosis factor receptor superfamily member 11A isoform 3 precursor	14	177
61	TNFRSF13C	"Tumor necrosis factor receptor superfamily, member 13C"	8	53
167	TNFRSF18	tumor necrosis factor receptor superfamily member 18 isoform 2 precursor	12	155
25	TNFRSF19	tumor necrosis factor receptor superfamily member 19 isoform 3	4	21
59	TNFRSF1A	"Tumor necrosis factor receptor superfamily member 1A, membrane form"	4	55
153	TNFRSF1B	"Similar to tumor necrosis factor receptor superfamily, member 1B (Fragment)"	16	137
173	TNFRSF21	Tumor necrosis factor receptor superfamily member 21	12	161
103	TNFRSF25	tumor necrosis factor receptor superfamily member 25 isoform 1 precursor	4	99
97	TNFRSF4	PREDICTED: tumor necrosis factor receptor superfamily member 4 isoform X1	45	52
131	TNFRSF6B	Tumor necrosis factor receptor superfamily member 6B	14	117
91	TNFSF13	tumor necrosis factor ligand superfamily member 13 isoform gamma proprotein	10	81
183	TNFSF13B	Tumor necrosis factor ligand superfamily member 13B	8	175
62	TNFSF9	Tumor necrosis factor ligand superfamily member 9	26	36
143	TRADD	Tumor necrosis factor receptor type 1-associated DEATH domain protein	6	137
177	VEGFA	vascular endothelial growth factor A isoform a	18	159
